# Supplementary material for: Tris(8-methoxy-2-quinolylmethyl)amine (8-MeOTQA) as a highly fluorescent Zn2+probe prepared by convenient C3-symmetric tripodal amine synthesis
Source: Royal Society of Chemistry journal article supplement (doi:10.1039/c5dt00514k), 2015-01-01
Supplement: c5dt00514k1.pdf [file c5dt00514k1.pdf]

Supplementary Information for

**Tris(8-methoxy-2-quinolylmethyl)amine (8-MeOTQA) as a highly fluorescent Zn<sup>2+</sup>  
probe prepared by convenient C<sub>3</sub>-symmetric tripodal amine synthesis**

Yuji Mikata,<sup>a,b,\*</sup> Yuki Nodomi,<sup>b</sup> Risa Ohnishi,<sup>b</sup> Asako Kizu<sup>b</sup> and Hideo Konno<sup>c</sup>

<sup>a</sup>*KYOUSEI Science Center and <sup>b</sup>Department of Chemistry, Faculty of Science, Nara Women's University, Nara 630-8506, Japan and <sup>c</sup>National Institute of Advanced Industrial Science and Technology (AIST), 1-1-1 Higashi, Tsukuba, Ibaraki 305-8565, Japan*

**Table S1** Crystallographic Data for Tris(2,4,6-trimethylbenzyl)amine (**2**) and 8-MeOTQA·0.5CH<sub>2</sub>Cl<sub>2</sub> (**4**·0.5CH<sub>2</sub>Cl<sub>2</sub>)

|                                                                     | <b>2</b>                           | 8-MeOTQA·0.5CH <sub>2</sub> Cl <sub>2</sub><br>( <b>4</b> ·0.5CH <sub>2</sub> Cl <sub>2</sub> ) |
|---------------------------------------------------------------------|------------------------------------|-------------------------------------------------------------------------------------------------|
| Formula                                                             | C <sub>30</sub> H <sub>39</sub> N  | C <sub>33.5</sub> H <sub>31</sub> ClN <sub>4</sub> O <sub>3</sub>                               |
| FW                                                                  | 413.64                             | 573.09                                                                                          |
| Crystal system                                                      | monoclinic                         | triclinic                                                                                       |
| Space group                                                         | <i>P</i> 2 <sub>1</sub> / <i>c</i> | <i>P</i> -1                                                                                     |
| <i>a</i> , Å                                                        | 10.2132(4)                         | 13.6378(18)                                                                                     |
| <i>b</i> , Å                                                        | 30.9988(11)                        | 14.5501(17)                                                                                     |
| <i>c</i> , Å                                                        | 16.2427(6)                         | 15.854(2)                                                                                       |
| $\alpha$ , deg                                                      | 90                                 | 76.043(6)                                                                                       |
| $\beta$ , deg                                                       | 95.006(3)                          | 82.248(6)                                                                                       |
| $\gamma$ , deg                                                      | 90                                 | 69.739(6)                                                                                       |
| <i>V</i> , Å <sup>3</sup>                                           | 5122.8(4)                          | 2859.5(7)                                                                                       |
| <i>Z</i>                                                            | 8                                  | 4                                                                                               |
| <i>D</i> <sub>calc</sub> , g cm <sup>-3</sup>                       | 1.073                              | 1.331                                                                                           |
| $\mu$ , mm <sup>-1</sup>                                            | 0.0607                             | 0.1758                                                                                          |
| 2 $\theta$ <sub>max</sub> , deg                                     | 55.0                               | 55.0                                                                                            |
| temp, K                                                             | 153                                | 153                                                                                             |
| no. reflns collected                                                | 50925                              | 23430                                                                                           |
| no. reflns used                                                     | 11658                              | 12543                                                                                           |
| no. of params                                                       | 793                                | 748                                                                                             |
| <i>R</i> <sub>int</sub>                                             | 0.0450                             | 0.0294                                                                                          |
| Final <i>R</i> 1 ( <i>I</i> > 2 $\sigma$ ( <i>I</i> )) <sup>a</sup> | 0.0685                             | 0.0757                                                                                          |
| <i>wR</i> 2 (all data) <sup>b</sup>                                 | 0.1693                             | 0.2382                                                                                          |
| GOF                                                                 | 1.096                              | 1.065                                                                                           |

$$^a R1 = \frac{\sum ||F_o| - |F_c||}{\sum |F_o|}, \quad ^b wR2 = \left[ \frac{\sum w[(F_o^2 - F_c^2)^2]}{\sum [w(F_o^2)^2]} \right]^{1/2}.$$

**Table S2** Crystallographic Data for [Zn(8-MeOTQA)](ClO<sub>4</sub>)<sub>2</sub> and [Cd(8-MeOTQA)](ClO<sub>4</sub>)<sub>2</sub>

|                                                            | [Zn(8-MeOTQA)](ClO <sub>4</sub> ) <sub>2</sub>                                    | [Cd(8-MeOTQA)](ClO <sub>4</sub> ) <sub>2</sub>                                   |
|------------------------------------------------------------|-----------------------------------------------------------------------------------|----------------------------------------------------------------------------------|
| Formula                                                    | C <sub>33</sub> H <sub>30</sub> Cl <sub>2</sub> N <sub>4</sub> O <sub>11</sub> Zn | C <sub>33</sub> H <sub>30</sub> CdCl <sub>2</sub> N <sub>4</sub> O <sub>11</sub> |
| FW                                                         | 794.91                                                                            | 841.94                                                                           |
| Crystal system                                             | monoclinic                                                                        | monoclinic                                                                       |
| Space group                                                | <i>P2<sub>1</sub>/c</i>                                                           | <i>P2<sub>1</sub>/c</i>                                                          |
| <i>a</i> , Å                                               | 18.484(2)                                                                         | 18.248(5)                                                                        |
| <i>b</i> , Å                                               | 11.4954(13)                                                                       | 11.367(3)                                                                        |
| <i>c</i> , Å                                               | 15.595(2)                                                                         | 15.943(5)                                                                        |
| β, deg                                                     | 105.6890(16)                                                                      | 95.105(3)                                                                        |
| <i>V</i> , Å <sup>3</sup>                                  | 3190.3(7)                                                                         | 3293.7(15)                                                                       |
| <i>Z</i>                                                   | 4                                                                                 | 4                                                                                |
| <i>D</i> <sub>calc</sub> , g cm <sup>-3</sup>              | 1.655                                                                             | 1.698                                                                            |
| μ, mm <sup>-1</sup>                                        | 1.0092                                                                            | 0.8957                                                                           |
| 2θ <sub>max</sub> , deg                                    | 55.0                                                                              | 55.0                                                                             |
| temp, K                                                    | 153                                                                               | 153                                                                              |
| no. reflns collected                                       | 23966                                                                             | 32773                                                                            |
| no. reflns used                                            | 7162                                                                              | 7560                                                                             |
| no. of params                                              | 580                                                                               | 460                                                                              |
| <i>R</i> <sub>int</sub>                                    | 0.0210                                                                            | 0.0409                                                                           |
| Final <i>R</i> 1 ( <i>I</i> > 2σ( <i>I</i> )) <sup>a</sup> | 0.0334                                                                            | 0.0453                                                                           |
| <i>wR</i> 2 (all data) <sup>b</sup>                        | 0.0891                                                                            | 0.1185                                                                           |
| GOF                                                        | 1.061                                                                             | 1.078                                                                            |

<sup>a</sup>*R*1 = Σ ||*F*<sub>o</sub>| - |*F*<sub>c</sub>|| / Σ |*F*<sub>o</sub>|.    <sup>b</sup>*wR*2 = [Σ*w*[(*F*<sub>o</sub><sup>2</sup> - *F*<sub>c</sub><sup>2</sup>)<sup>2</sup>] / Σ [*w*(*F*<sub>o</sub><sup>2</sup>)<sup>2</sup>]]<sup>1/2</sup>.

**Table S3** Crystallographic Data for [Zn(6-MeOTQA)(DMF)(ClO<sub>4</sub>)]ClO<sub>4</sub>·0.5H<sub>2</sub>O and [Zn(8-MeOBQPA)(CH<sub>3</sub>OH)](ClO<sub>4</sub>)<sub>2</sub>·0.5H<sub>2</sub>O

|                                                                     | [Zn(6-MeOTQA)(DMF)-<br>(ClO <sub>4</sub> )]ClO <sub>4</sub> ·0.5H <sub>2</sub> O    | [Zn(8-MeOBQPA)-<br>(CH <sub>3</sub> OH)](ClO <sub>4</sub> ) <sub>2</sub> ·0.5H <sub>2</sub> O |
|---------------------------------------------------------------------|-------------------------------------------------------------------------------------|-----------------------------------------------------------------------------------------------|
| Formula                                                             | C <sub>36</sub> H <sub>38</sub> Cl <sub>2</sub> N <sub>5</sub> O <sub>12.5</sub> Zn | C <sub>29</sub> H <sub>31</sub> Cl <sub>2</sub> N <sub>4</sub> O <sub>11.5</sub> Zn           |
| FW                                                                  | 877.01                                                                              | 755.87                                                                                        |
| Crystal system                                                      | monoclinic                                                                          | triclinic                                                                                     |
| Space group                                                         | <i>Cc</i>                                                                           | <i>P</i> -1                                                                                   |
| <i>a</i> , Å                                                        | 19.446(5)                                                                           | 12.5269(17)                                                                                   |
| <i>b</i> , Å                                                        | 14.257(3)                                                                           | 14.684(2)                                                                                     |
| <i>c</i> , Å                                                        | 15.252(4)                                                                           | 20.826(3)                                                                                     |
| $\alpha$ , deg                                                      | 90                                                                                  | 72.888(7)                                                                                     |
| $\beta$ , deg                                                       | 116.370(2)                                                                          | 69.124(7)                                                                                     |
| $\gamma$ , deg                                                      | 90                                                                                  | 64.913(6)                                                                                     |
| <i>V</i> , Å <sup>3</sup>                                           | 3788.2(17)                                                                          | 3195.0(8)                                                                                     |
| <i>Z</i>                                                            | 4                                                                                   | 4                                                                                             |
| <i>D</i> <sub>calc</sub> , g cm <sup>-3</sup>                       | 1.538                                                                               | 1.571                                                                                         |
| $\mu$ , mm <sup>-1</sup>                                            | 0.8613                                                                              | 1.0041                                                                                        |
| 2 $\theta$ <sub>max</sub> , deg                                     | 55.0                                                                                | 55.0                                                                                          |
| temp, K                                                             | 153                                                                                 | 153                                                                                           |
| no. reflns collected                                                | 14423                                                                               | 25181                                                                                         |
| no. reflns used                                                     | 6352                                                                                | 13957                                                                                         |
| no. of params                                                       | 532                                                                                 | 904                                                                                           |
| <i>R</i> <sub>int</sub>                                             | 0.0236                                                                              | 0.0257                                                                                        |
| Final <i>R</i> 1 ( <i>I</i> > 2 $\sigma$ ( <i>I</i> )) <sup>a</sup> | 0.0396                                                                              | 0.0501                                                                                        |
| <i>wR</i> 2 (all data) <sup>b</sup>                                 | 0.1017                                                                              | 0.1321                                                                                        |
| GOF                                                                 | 1.082                                                                               | 1.081                                                                                         |

$$^a R1 = \sum ||F_o| - |F_c|| / \sum |F_o|. \quad ^b wR2 = [\sum w[(F_o^2 - F_c^2)^2] / \sum [w(F_o^2)^2]]^{1/2}.$$

**Table S4** Crystallographic Data for [Cd(8-MeOBQPA)(CH<sub>3</sub>OH)](ClO<sub>4</sub>)<sub>2</sub>·CH<sub>3</sub>OH

| [Cd(8-MeOBQPA)(CH <sub>3</sub> OH)](ClO <sub>4</sub> ) <sub>2</sub> ·CH <sub>3</sub> OH |                                                                                  |
|-----------------------------------------------------------------------------------------|----------------------------------------------------------------------------------|
| Formula                                                                                 | C <sub>30</sub> H <sub>34</sub> CdCl <sub>2</sub> N <sub>4</sub> O <sub>12</sub> |
| FW                                                                                      | 825.93                                                                           |
| Crystal system                                                                          | monoclinic                                                                       |
| Space group                                                                             | <i>P</i> 2 <sub>1</sub> / <i>c</i>                                               |
| <i>a</i> , Å                                                                            | 17.838(3)                                                                        |
| <i>b</i> , Å                                                                            | 11.9318(16)                                                                      |
| <i>c</i> , Å                                                                            | 15.668(2)                                                                        |
| β, deg                                                                                  | 97.0190(17)                                                                      |
| <i>V</i> , Å <sup>3</sup>                                                               | 3309.8(8)                                                                        |
| <i>Z</i>                                                                                | 4                                                                                |
| <i>D</i> <sub>calc</sub> , g cm <sup>-3</sup>                                           | 1.657                                                                            |
| μ, mm <sup>-1</sup>                                                                     | 0.8914                                                                           |
| 2θ <sub>max</sub> , deg                                                                 | 55.0                                                                             |
| temp, K                                                                                 | 153                                                                              |
| no. reflns collected                                                                    | 25209                                                                            |
| no. reflns used                                                                         | 7549                                                                             |
| no. of params                                                                           | 446                                                                              |
| <i>R</i> <sub>int</sub>                                                                 | 0.0207                                                                           |
| Final <i>R</i> 1 ( <i>I</i> > 2σ( <i>I</i> )) <sup>a</sup>                              | 0.0440                                                                           |
| <i>wR</i> 2 (all data) <sup>b</sup>                                                     | 0.1201                                                                           |
| GOF                                                                                     | 1.066                                                                            |

<sup>a</sup>*R*1 = Σ||*F*<sub>o</sub>| - |*F*<sub>c</sub>||/Σ|*F*<sub>o</sub>|. <sup>b</sup>*wR*2 = [Σ*w*[(*F*<sub>o</sub><sup>2</sup> - *F*<sub>c</sub><sup>2</sup>)<sup>2</sup>]/Σ[*w*(*F*<sub>o</sub><sup>2</sup>)<sup>2</sup>]]<sup>1/2</sup>.

**Table S5** Comparison of Fluorescence Sensing Properties of 8-Hydroxy- or 8-Alkoxy-2-aminomethylquinoline Derivatives

| Compound <sup>a</sup> | $I_{Zn}/I_0$ | $I_{Ca}/I_{Zn}(\%)$ | $\phi_{Zn}$ | Solvent                        | Reference |
|-----------------------|--------------|---------------------|-------------|--------------------------------|-----------|
| 8-MeOTQA(4)           | 16           | 16                  | 0.51        | DMF-H <sub>2</sub> O (1:1)     | -         |
| <b>A</b>              | -            | 75                  | -           | MeOH (0.01 M NaOAc)            | b         |
| <b>B</b>              | -            | 15                  | -           | MeOH (0.01 M NaOAc)            | b         |
| <b>C</b>              | -            | ~50                 | -           | MeOH (0.01 M NaOAc)            | c         |
| <b>D</b>              | 7            | 44                  | -           | CH <sub>3</sub> CN-HEPES (4:1) | d         |
| <b>E</b>              | 17           | ~250                | -           | 10 mM HEPES buffer             | e         |
| <b>F</b>              | 0.5          | ~120                | -           | 10 mM HEPES buffer             | e         |
|                       | 13           | -                   | 0.03        | 50 mM HEPES-DMSO (99:1)        | h         |
| <b>G</b>              | ~10          | ~130                | 0.24        | 50 mM HEPES buffer             | f         |
|                       | 11           | -                   | 0.24        | 50 mM HEPES-DMSO (99:1)        | j         |
| <b>H</b>              | ~6           | ~100                | 0.43        | 25 mM HEPES buffer             | g         |
| <b>I</b>              | ~4           | ~200                | 0.24        | 25 mM HEPES-DMSO (95:5)        | h         |
| <b>J</b>              | ~5           | ~120                | 0.49        | 25 mM HEPES-DMSO (95:5)        | h         |
| <b>K</b>              | ~6           | ~200                | 0.65        | 25 mM HEPES-DMSO (95:5)        | h         |
| <b>L</b>              | ~9           | ~13                 | -           | MeOH-H <sub>2</sub> O (1:1)    | i         |
| <b>M</b>              | 3.6          | -                   | 0.03        | 50 mM HEPES-DMSO (99:1)        | j         |

<sup>a</sup> See Chart S1.

<sup>b</sup> *J. Org. Chem.*, 2001, **66**, 4752.

<sup>c</sup> *Anal. Sci.*, 2003, **19**, 1353.

<sup>d</sup> *Dalton Trans.*, 2004, 2771.

<sup>e</sup> *Chem. Eur. J.*, 2006, **12**, 9066.

<sup>f</sup> *J. Am. Chem. Soc.*, 2006, **128**, 3854.

<sup>g</sup> *Org. Lett.*, 2007, **9**, 4995.

<sup>h</sup> *Inorg. Chem.*, 2008, **47**, 4310.

<sup>i</sup> *Dalton Trans.*, 2013, **42**, 14516.

<sup>j</sup> *Polyhedron*, 2013, **58**, 85.

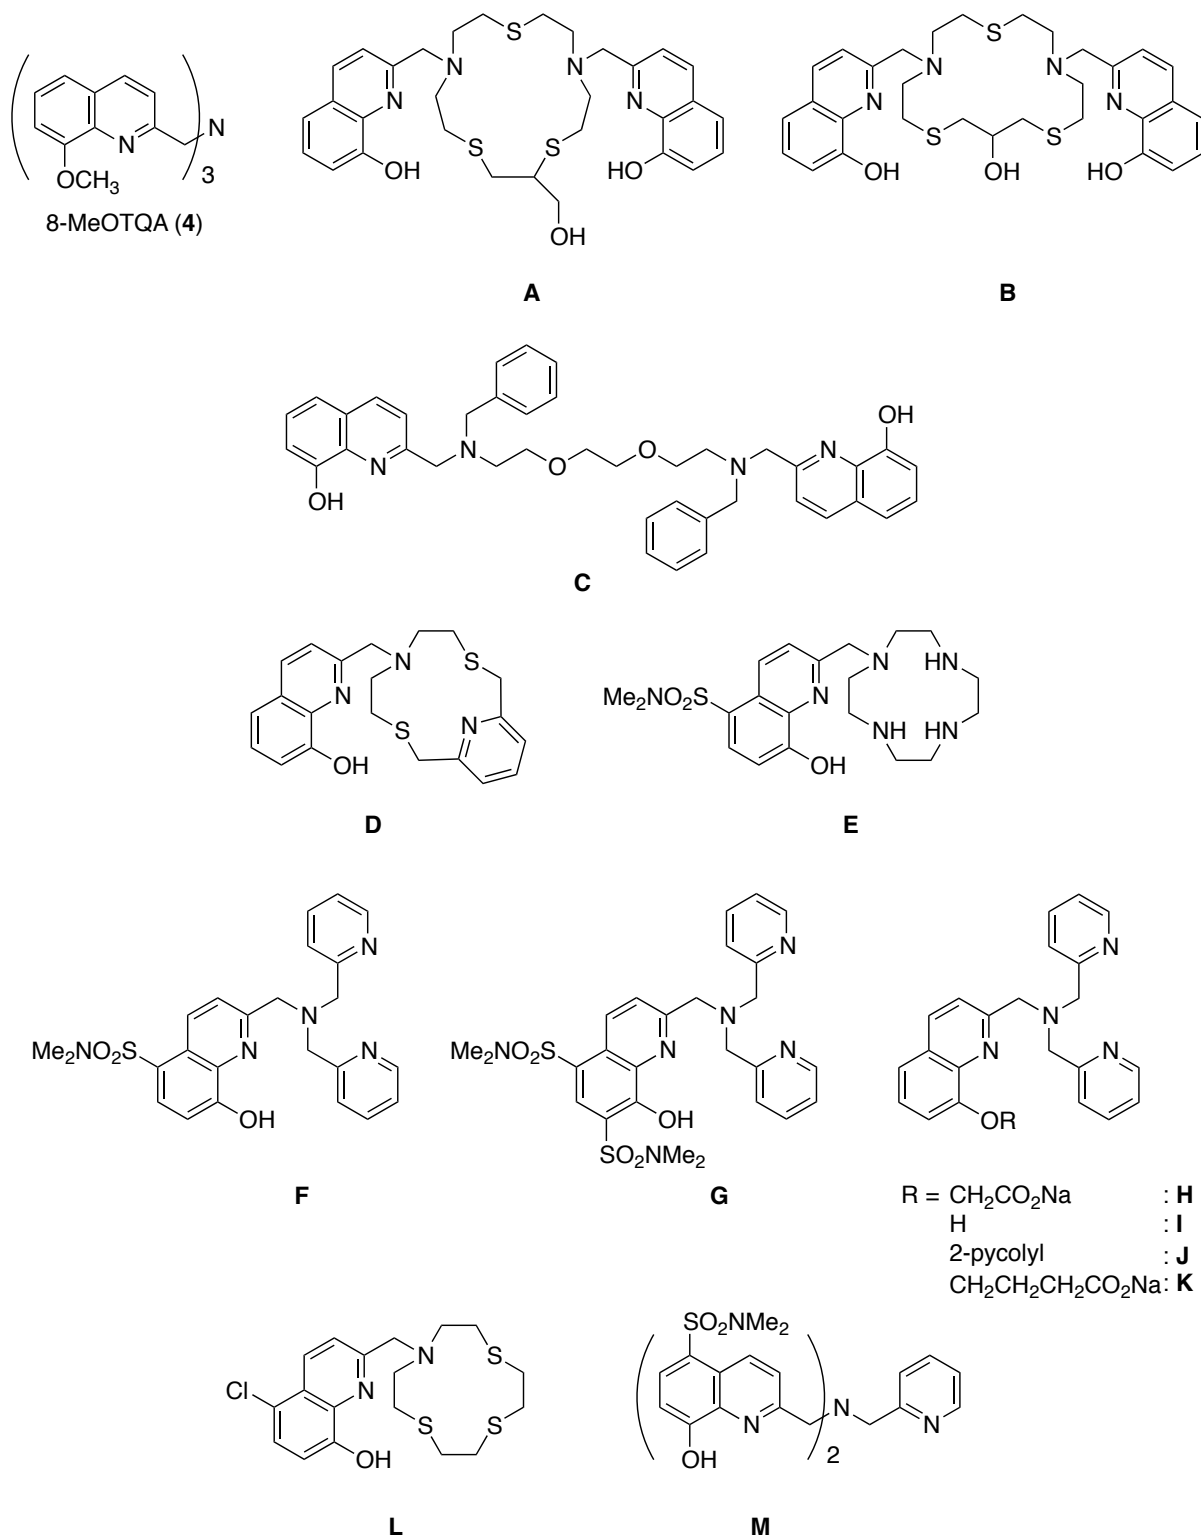

Chart S1

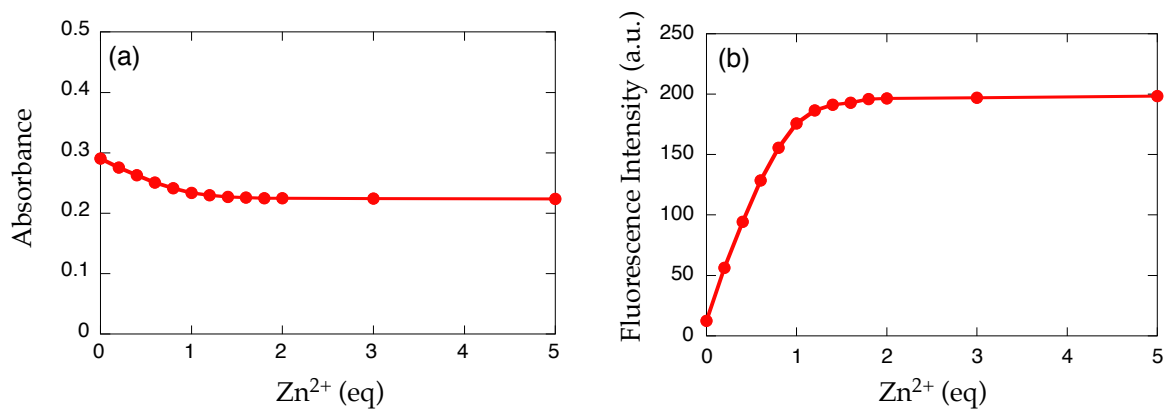

**Fig. S1** (a) Absorbance (at 304 nm) and (b) fluorescence (at 442 nm) spectral changes for 34  $\mu\text{M}$  8-MeOTQA (4) in the presence of increasing amount of  $\text{Zn}^{2+}$  in DMF-H<sub>2</sub>O (1:1) ( $\lambda_{\text{ex}} = 335 \text{ nm}$ , 25 °C).



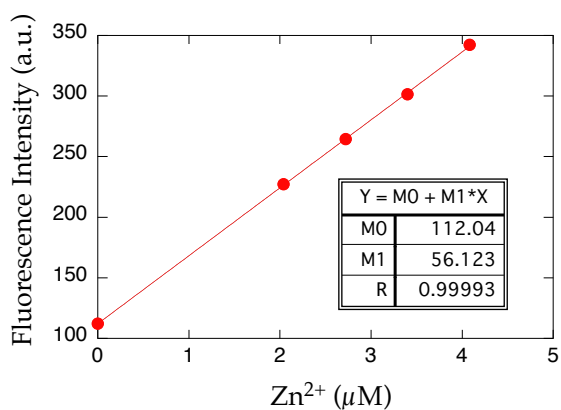

**Fig. S2** Estimation of LOD (limit of detection) for  $\text{Zn}^{2+}$  with 8-MeOTQA in DMF- $\text{H}_2\text{O}$  (1:1). The  $3\sigma$  value ( $\sigma$  corresponds to standard deviation from 5 measurements) of blank solution (34  $\mu\text{M}$  8-MeOTQA) is 0.191 in fluorescence intensity unit, which corresponds to 3.4 nM from the slope of the linear dynamic fluorescence intensity plot ( $k$ ) shown above ( $\text{LOD} = 3\sigma/k$ ).

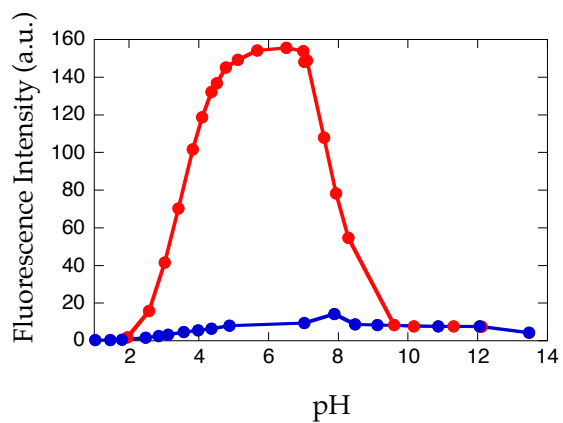

**Fig. S3** Effect of pH on fluorescence intensity of 34  $\mu\text{M}$  8-MeOTQA (**4**) at 442 nm in the absence (blue) and presence (red) of 1 equiv. of  $\text{Zn}^{2+}$  in DMF- $\text{H}_2\text{O}$  (1:1) at 25  $^\circ\text{C}$  ( $\lambda_{\text{ex}} = 335 \text{ nm}$ ).

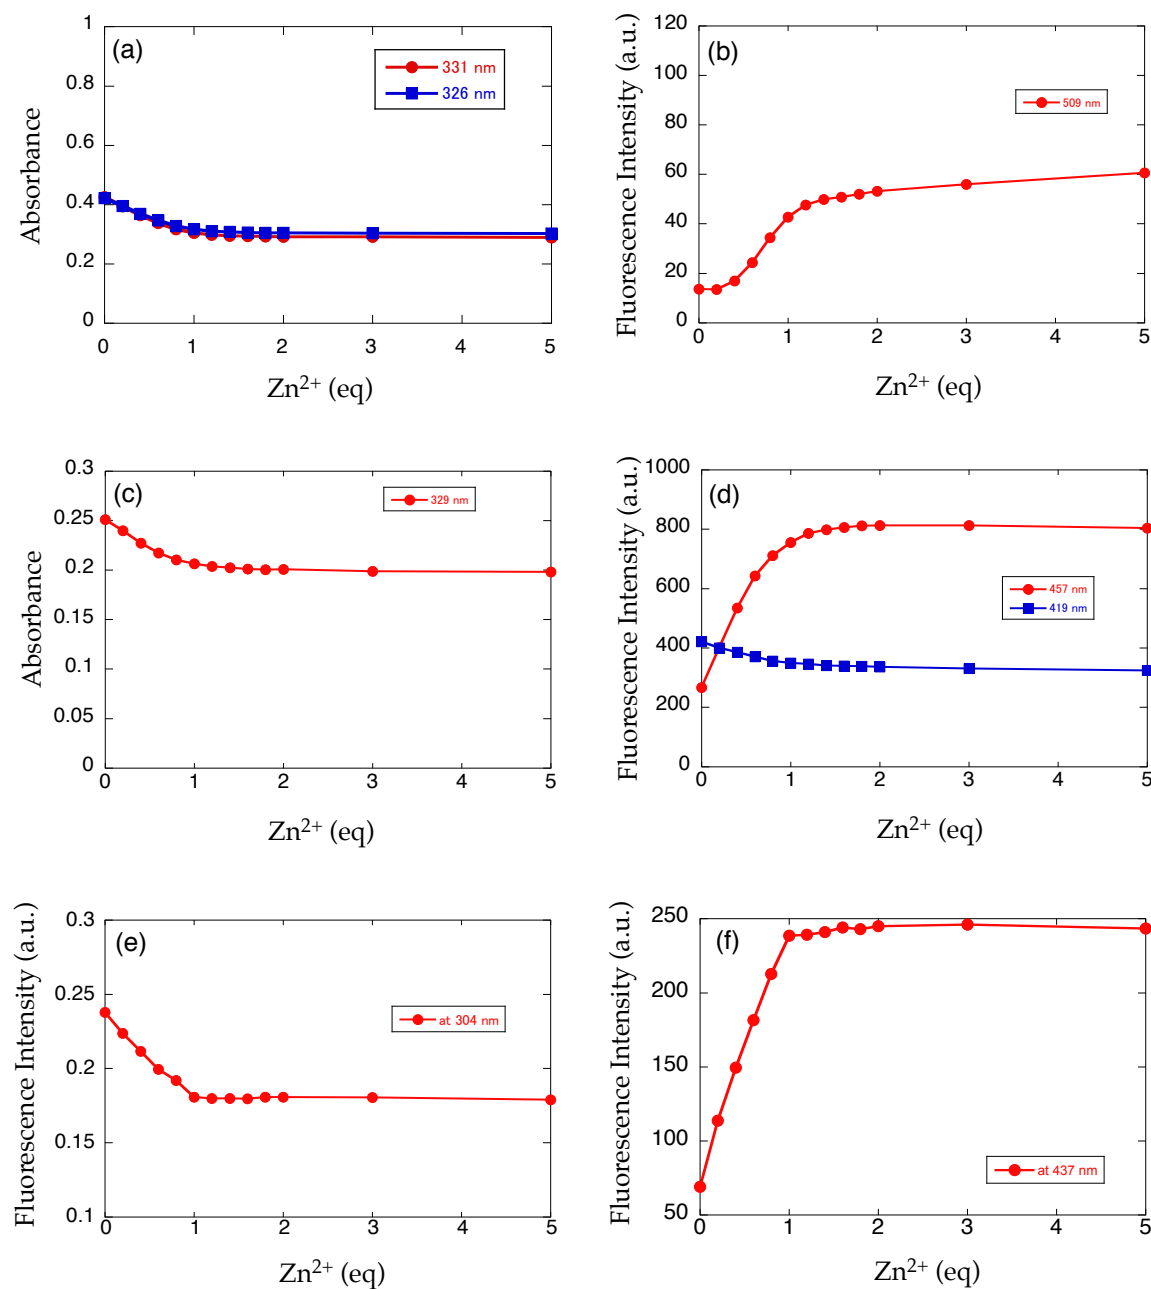

**Fig. S4** (a, c, e) Absorbance and (b, d, f) fluorescence spectral changes for 34  $\mu\text{M}$  (a, b) 6-MeOTQA (**3**), (c, d) 6,8-DiMeOTQA (**5**) and (e, f) 8-MeOBQPA (**8**) in the presence of increasing amount of Zn<sup>2+</sup> in DMF-H<sub>2</sub>O (1:1) at 25 °C ( $\lambda_{\text{ex}}$  = 332 nm for 6-MeOTQA; 347 nm for 6,8-DiMeOTQA; 335 nm for 8-MeOBQPA).

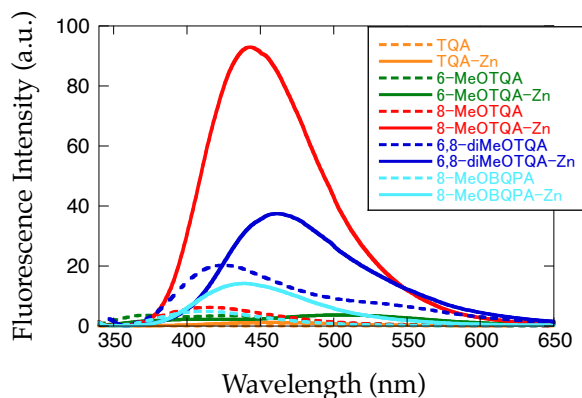

**Fig. S5** Comparison of fluorescence spectra of 34  $\mu\text{M}$  TQA (orange), 6-MeOTQA (**3**) (green), and 8-MeOTQA (**4**) (red), 6,8-DiMeOTQA (**5**) (blue) and 8-MeOBQPA (**8**) (light blue) in the presence (solid lines) and absence (broken lines) of 1 equiv. of  $\text{Zn}^{2+}$  in DMF- $\text{H}_2\text{O}$  (1:1) at 25  $^\circ\text{C}$  ( $\lambda_{\text{ex}}$  = 317 nm for TQA; 332 nm for 6-MeOTQA; 335 nm for 8-MeOTQA and 8-MeOBQPA; 347 nm for 6,8-DiMeOTQA).

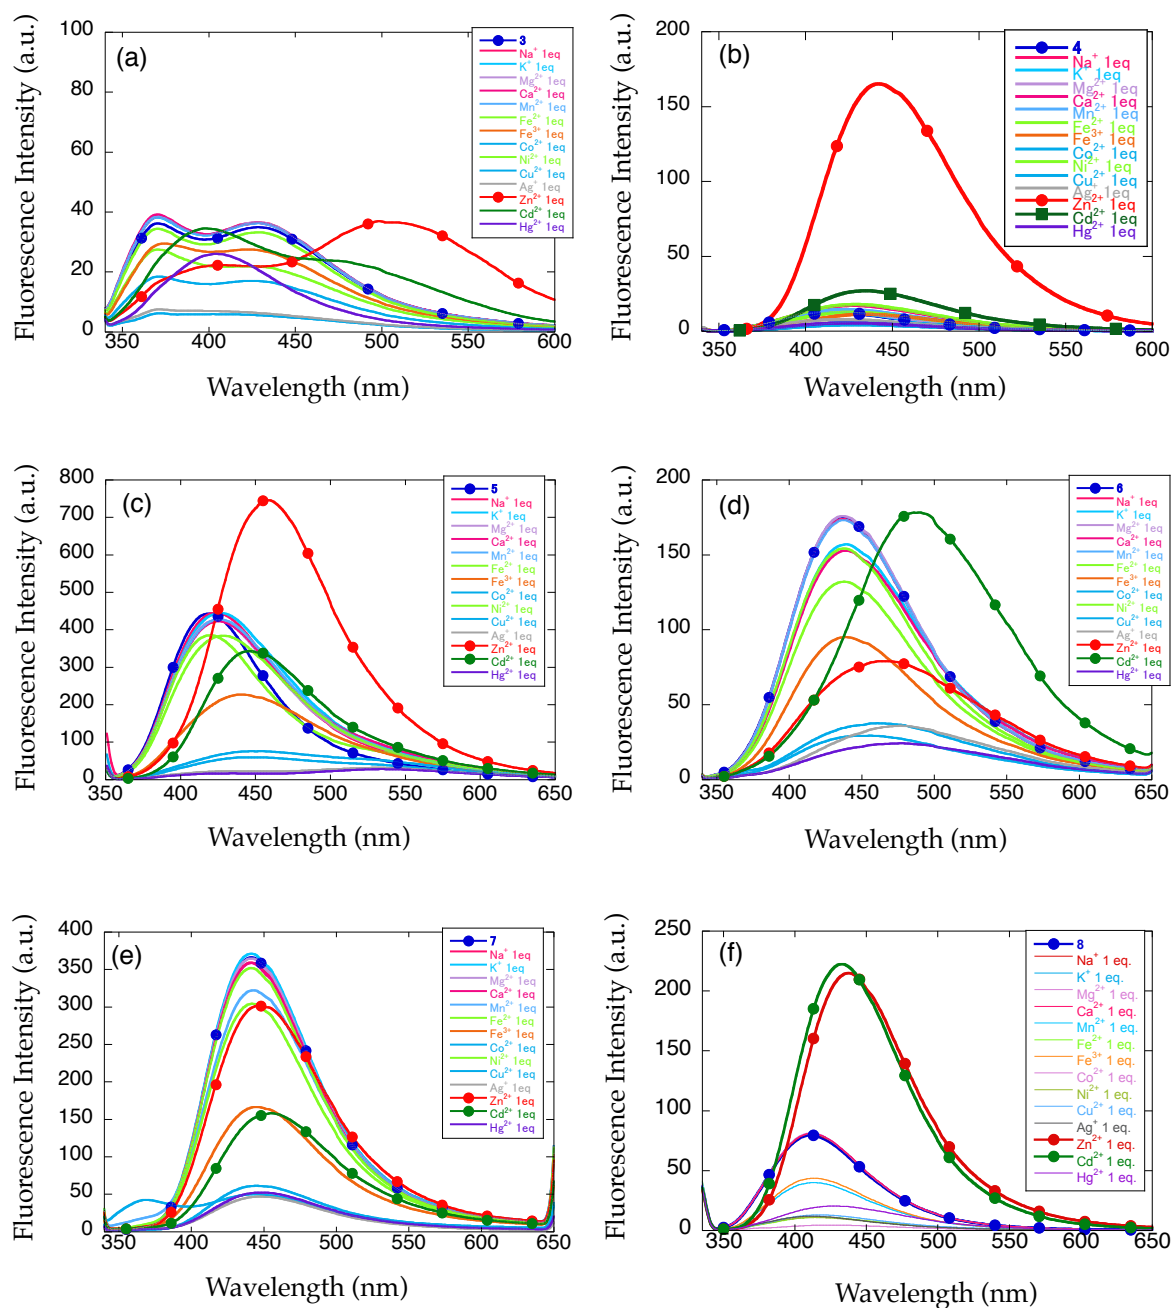

**Fig. S6** Comparison of fluorescence spectra of 34  $\mu\text{M}$  (a) 6-MeOTQA (3), (b) 8-MeOTQA (4), (c) 6,8-DeiMeOTQA (5), (d) 5,6,7-TriMeOTQA (6), (e) 8-MeSTQA (7) and (f) 8-MeOBQPA (8) in the presence of 1 equiv. of various metal ions in DMF-H<sub>2</sub>O (1:1) at 25 °C.

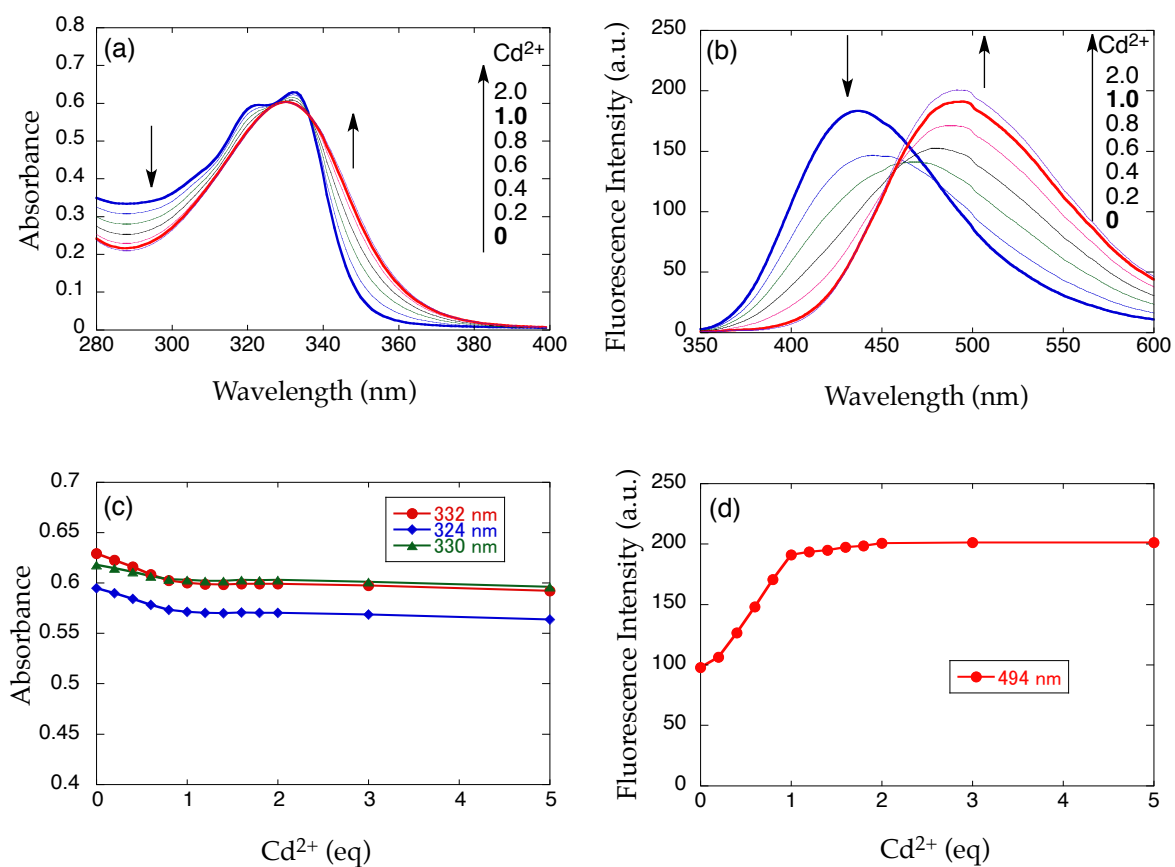

**Fig. S7** Absorption and fluorescence spectral changes of 34  $\mu\text{M}$  5,6,7-TriMeOTQA (6) in DMF-H<sub>2</sub>O (1:1) in the presence of Cd<sup>2+</sup> ( $\lambda_{\text{ex}} = 332 \text{ nm}$ , 25 °C). (a, c) Absorbance changes upon addition of Cd<sup>2+</sup>. (b, d) Fluorescence changes upon addition of Cd<sup>2+</sup>.

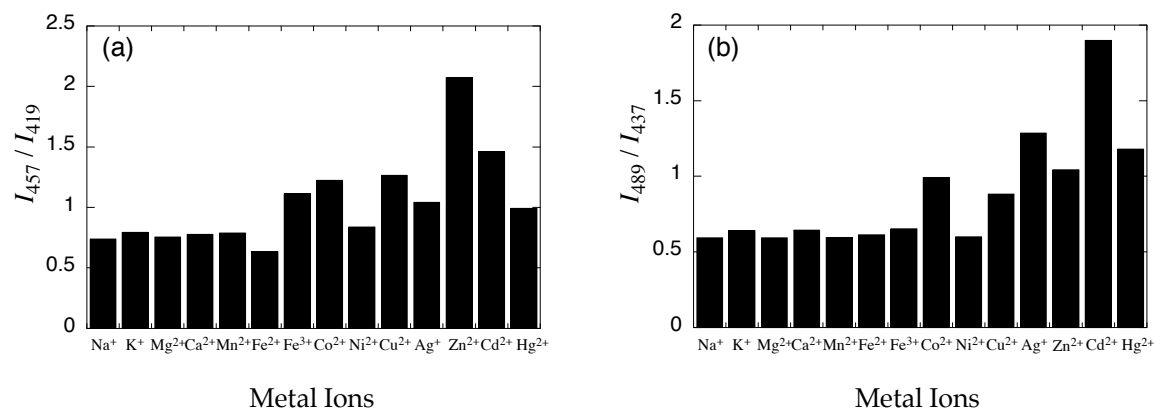

**Fig. S8** The relative fluorescence intensity of (a) 6,8-DiMeOTQA (5) and (b) 5,6,7-TriMeOTQA (6) in the presence of 1 equiv. of metal ions in DMF-H<sub>2</sub>O (1:1) at 25 °C.

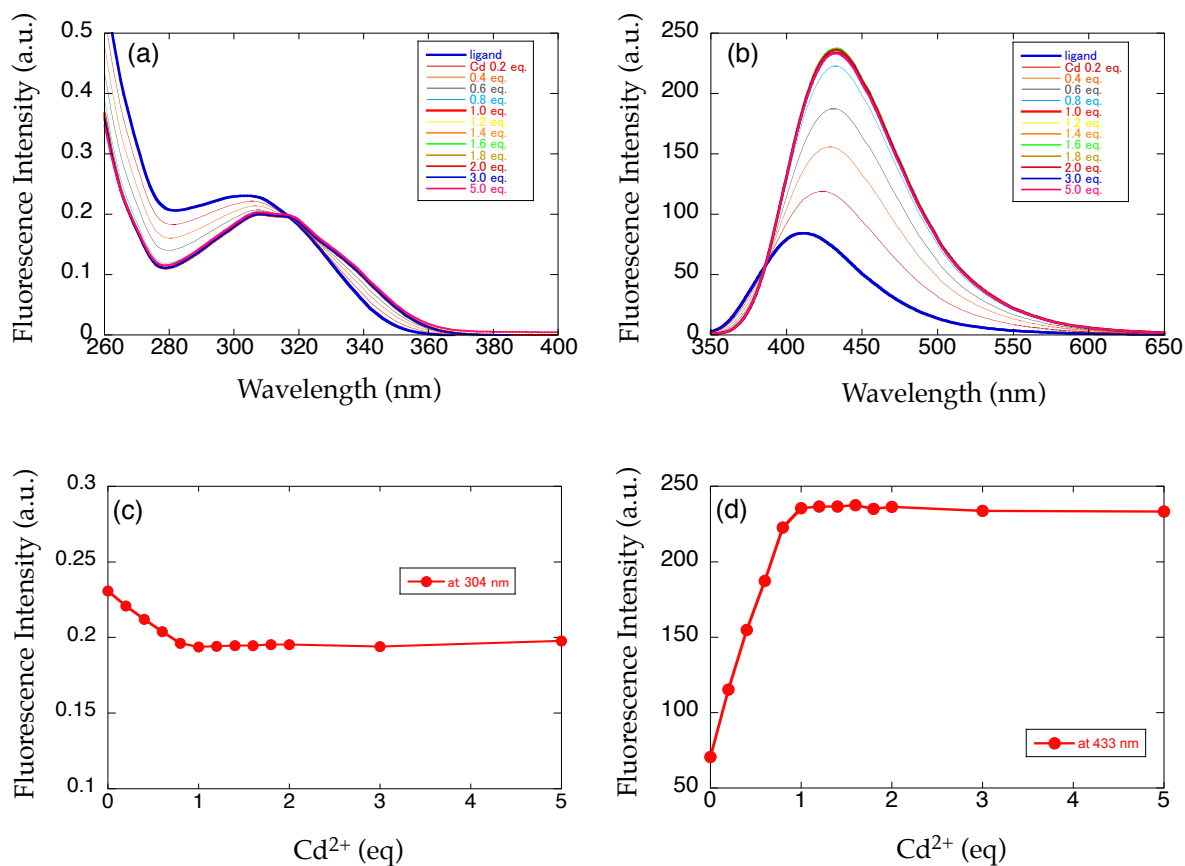

**Fig. S9** Absorption and fluorescence spectral changes of 34  $\mu\text{M}$  8-MeOBQPA (8) in the presence of  $\text{Cd}^{2+}$  in DMF-H<sub>2</sub>O (1:1) ( $\lambda_{\text{ex}} = 335 \text{ nm}$ , 25 °C). (a, c) Absorbance changes upon addition of  $\text{Cd}^{2+}$ . (b, d) Fluorescence changes upon addition of  $\text{Cd}^{2+}$ .



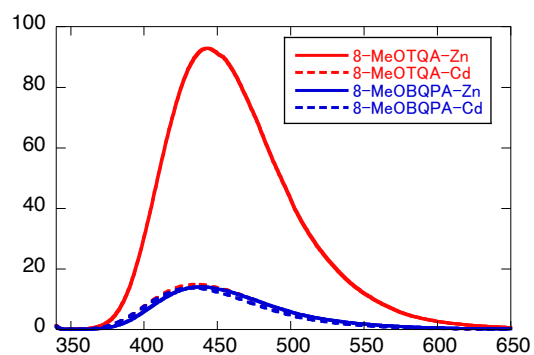

**Fig. S10** Comparison of fluorescence spectra for 34  $\mu\text{M}$  8-MeOTQA (**4**) (red) and 8-MeOBQPA (**8**) (blue) in DMF-H<sub>2</sub>O (1:1) in the presence of 1 equiv. of Zn<sup>2+</sup> (solid lines) or Cd<sup>2+</sup> (broken lines) ( $\lambda_{\text{ex}} = 335 \text{ nm}$ , 25 °C).

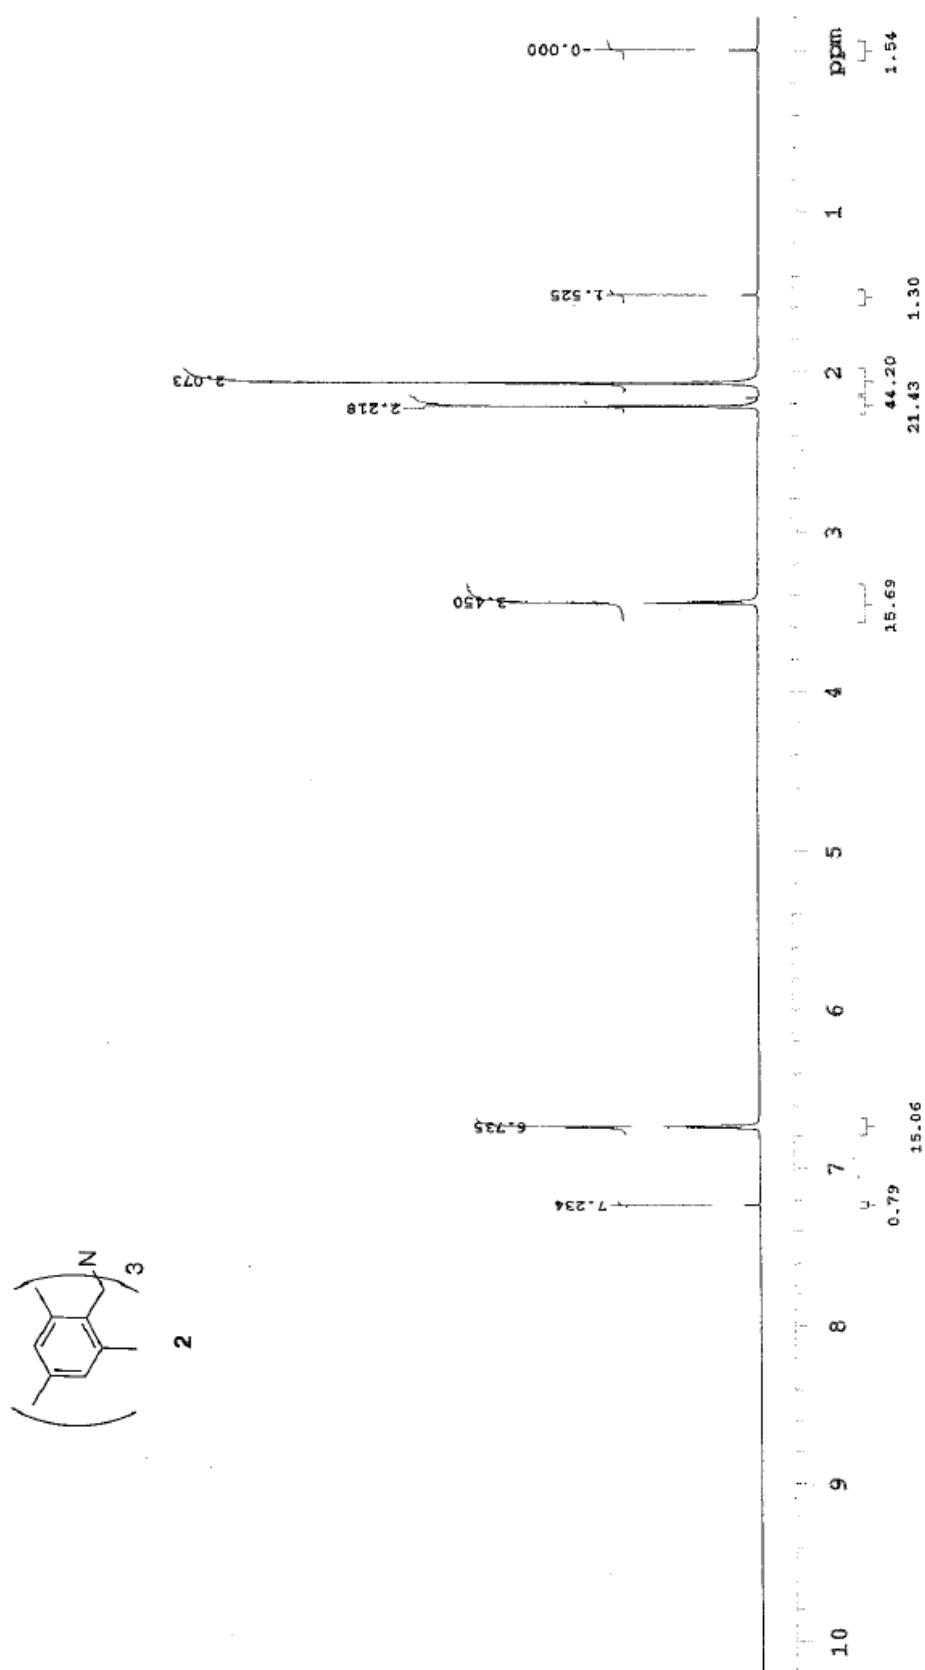

Fig. S11 <sup>1</sup>H NMR spectrum of **2** in CDCl<sub>3</sub>.

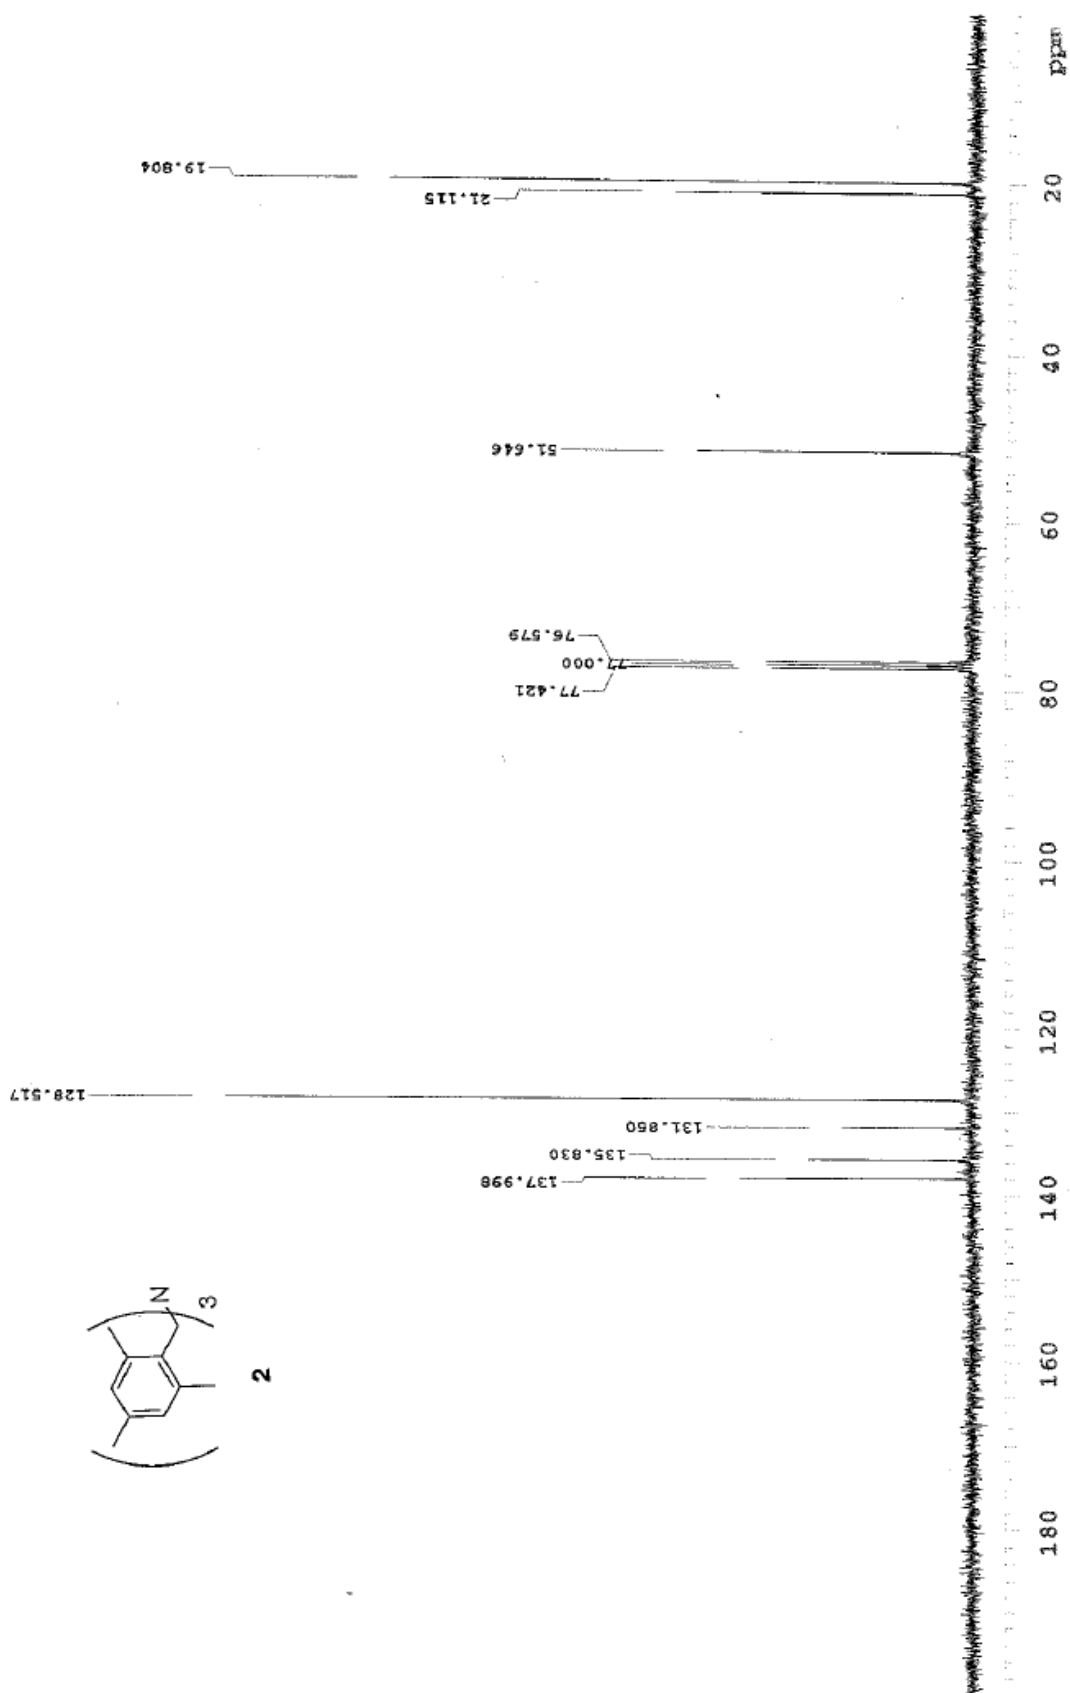

Fig. S12  $^{13}\text{C}$  NMR spectrum of **2** in  $\text{CDCl}_3$ .

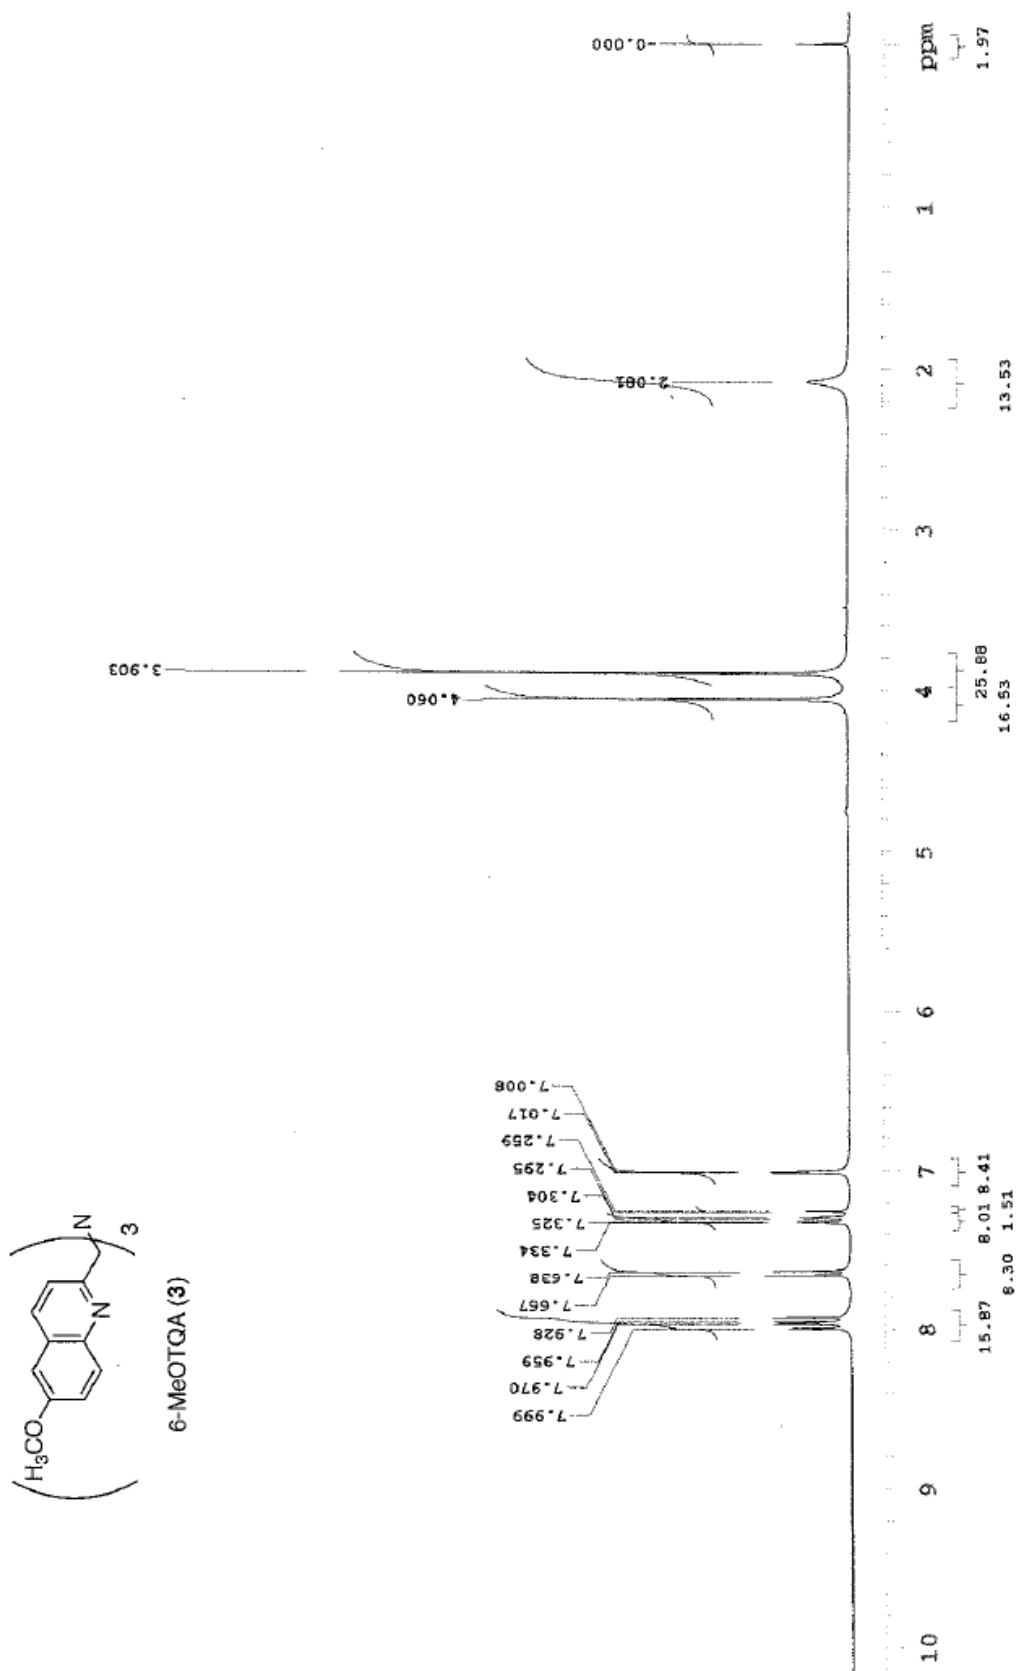

Fig. S13 <sup>1</sup>H NMR spectrum of 6-MeOTQA (3) in CDCl<sub>3</sub>.

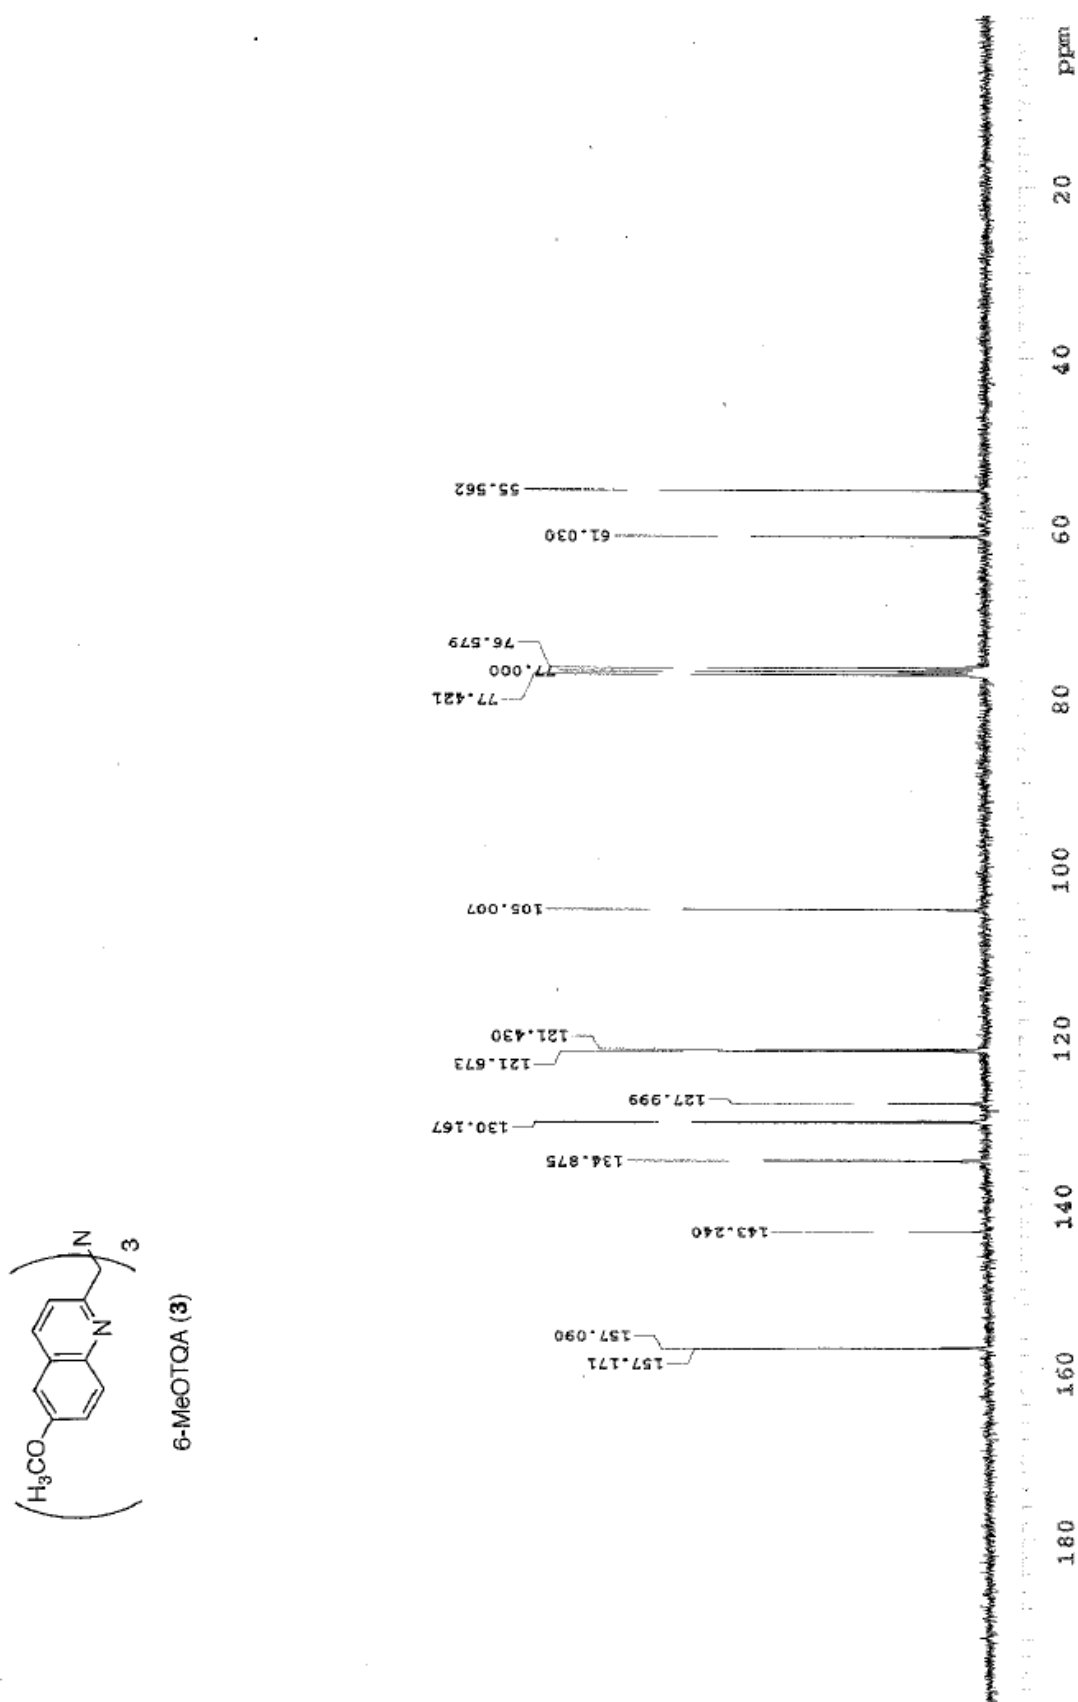

Fig. S14 <sup>13</sup>C NMR spectrum of 6-MeOTQA (3) in CDCl<sub>3</sub>.

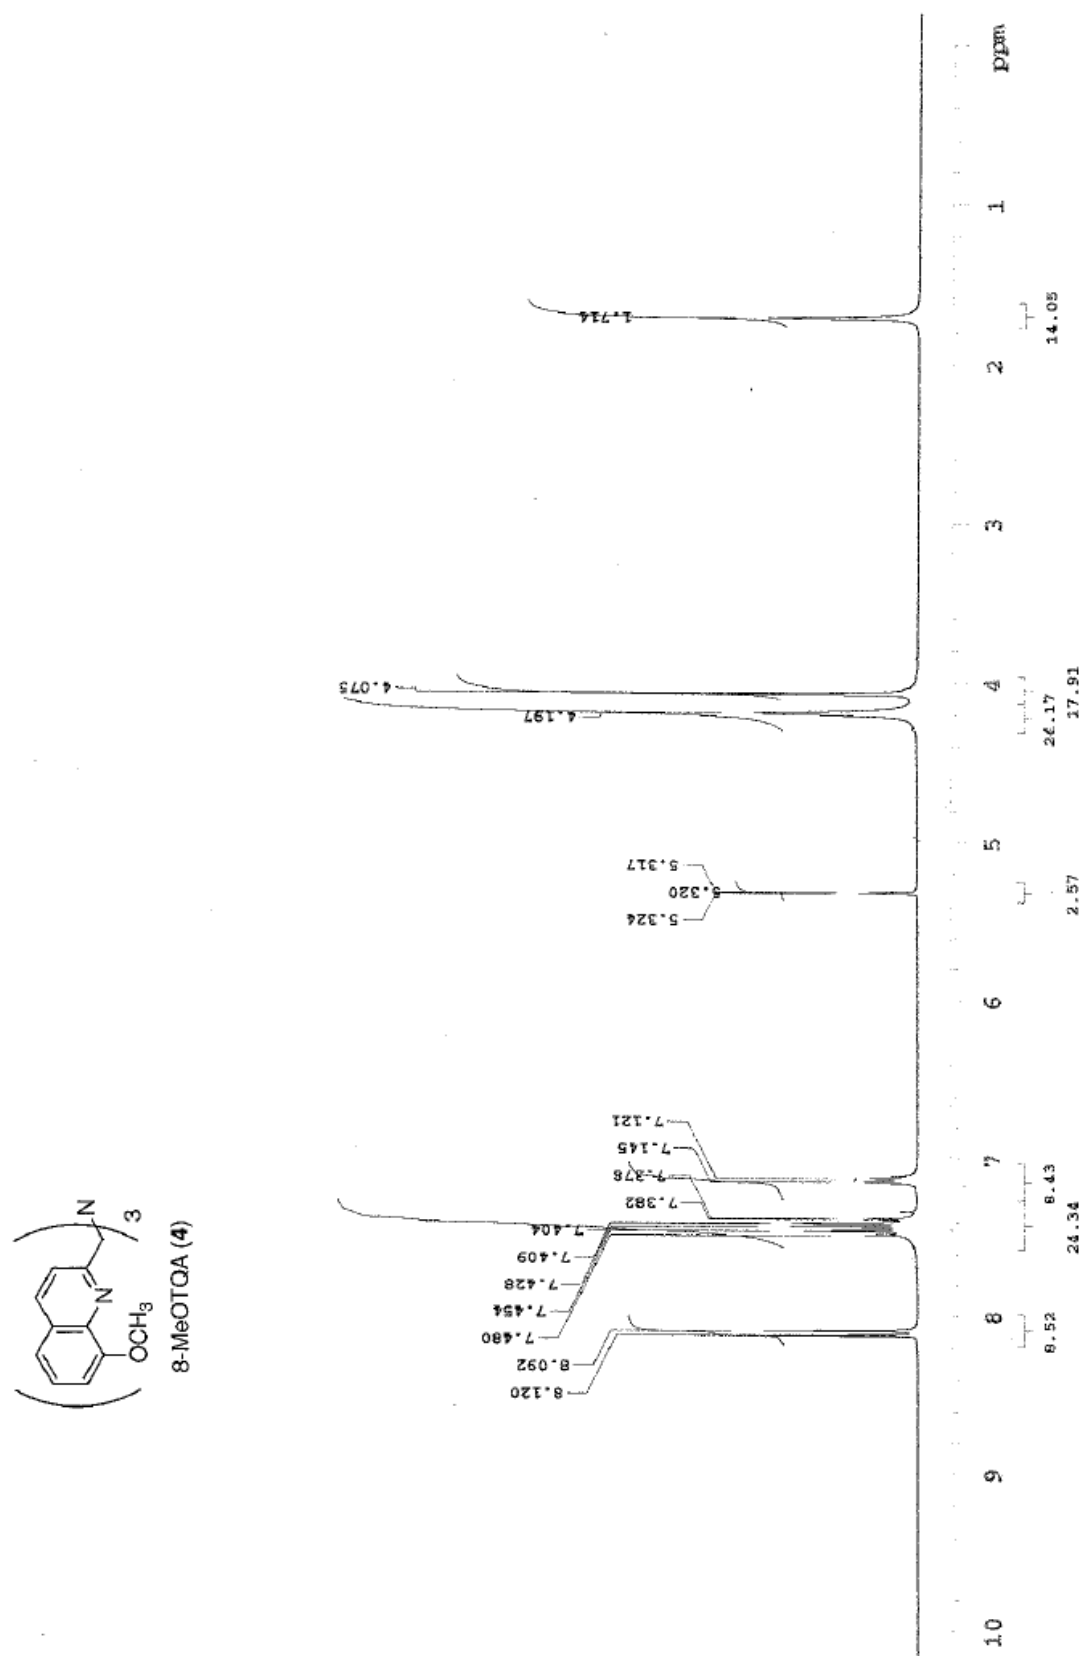

Fig. S15 <sup>1</sup>H NMR spectrum of 8-MeOTQA (4) in CD<sub>2</sub>Cl<sub>2</sub>.

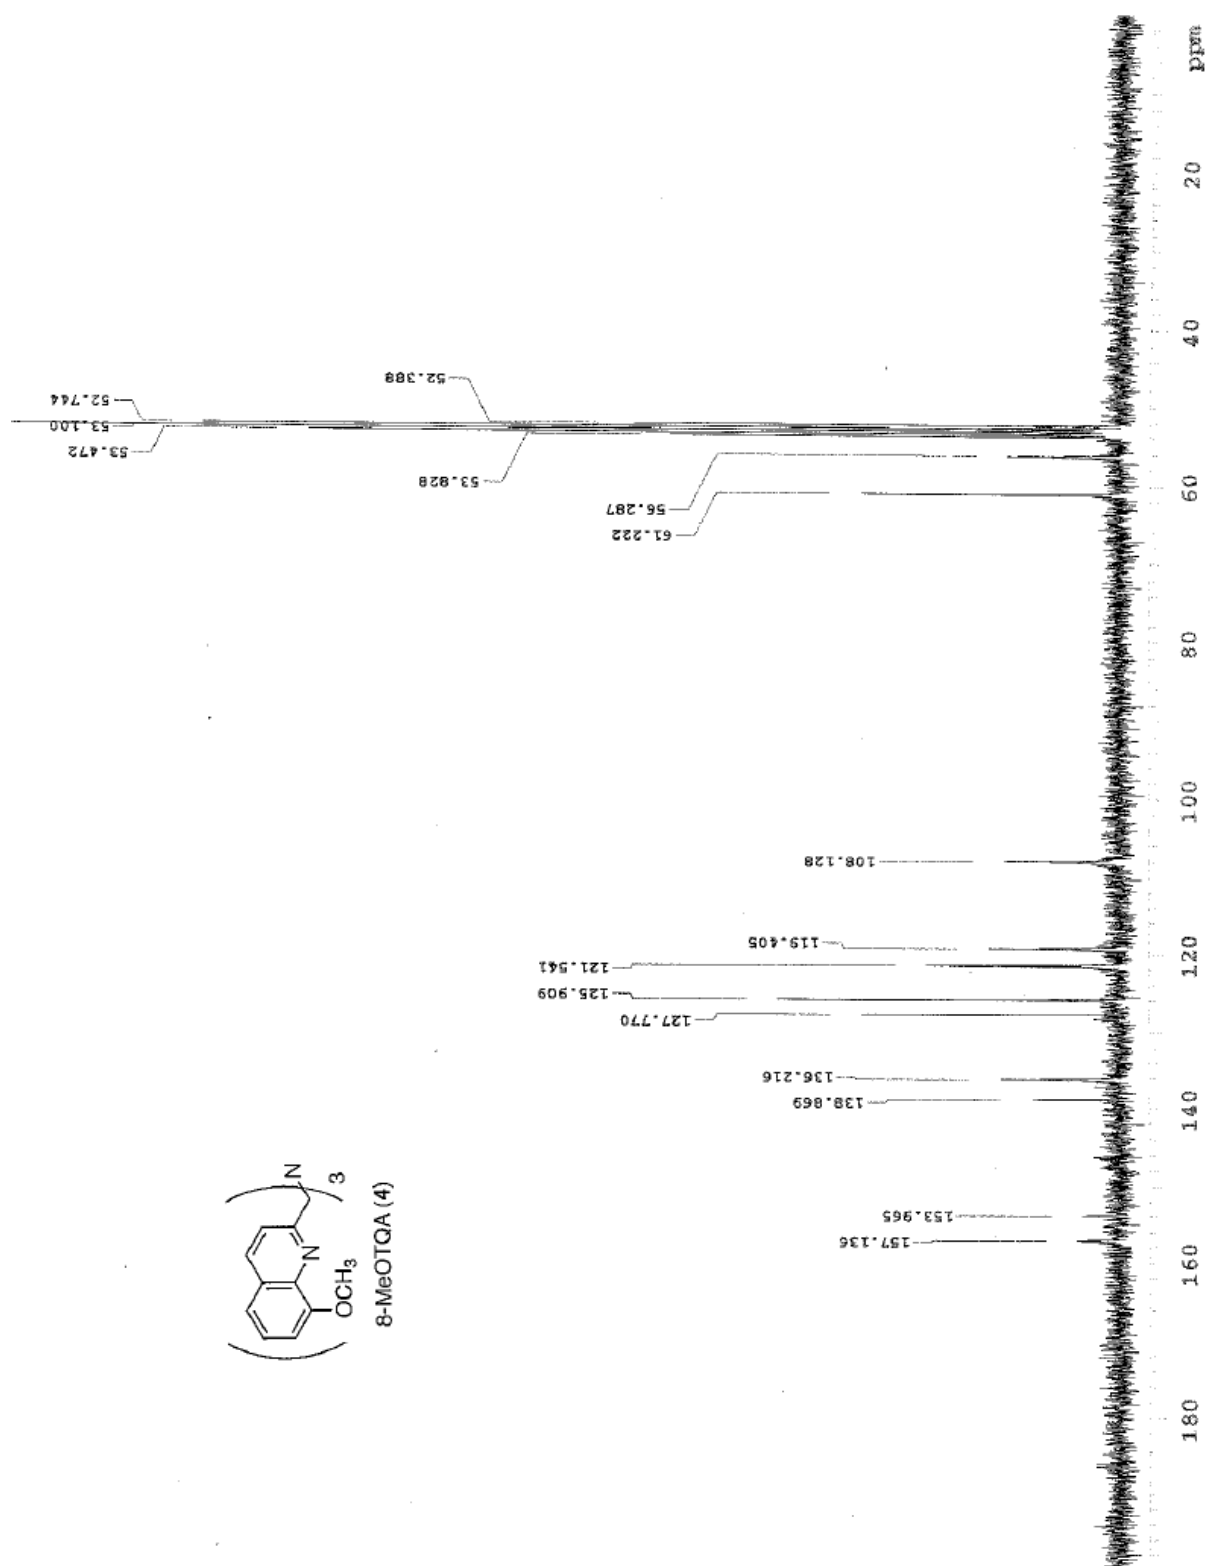

Fig. S16  $^{13}\text{C}$  NMR spectrum of 8-MeOTQA (4) in  $\text{CD}_2\text{Cl}_2$ .

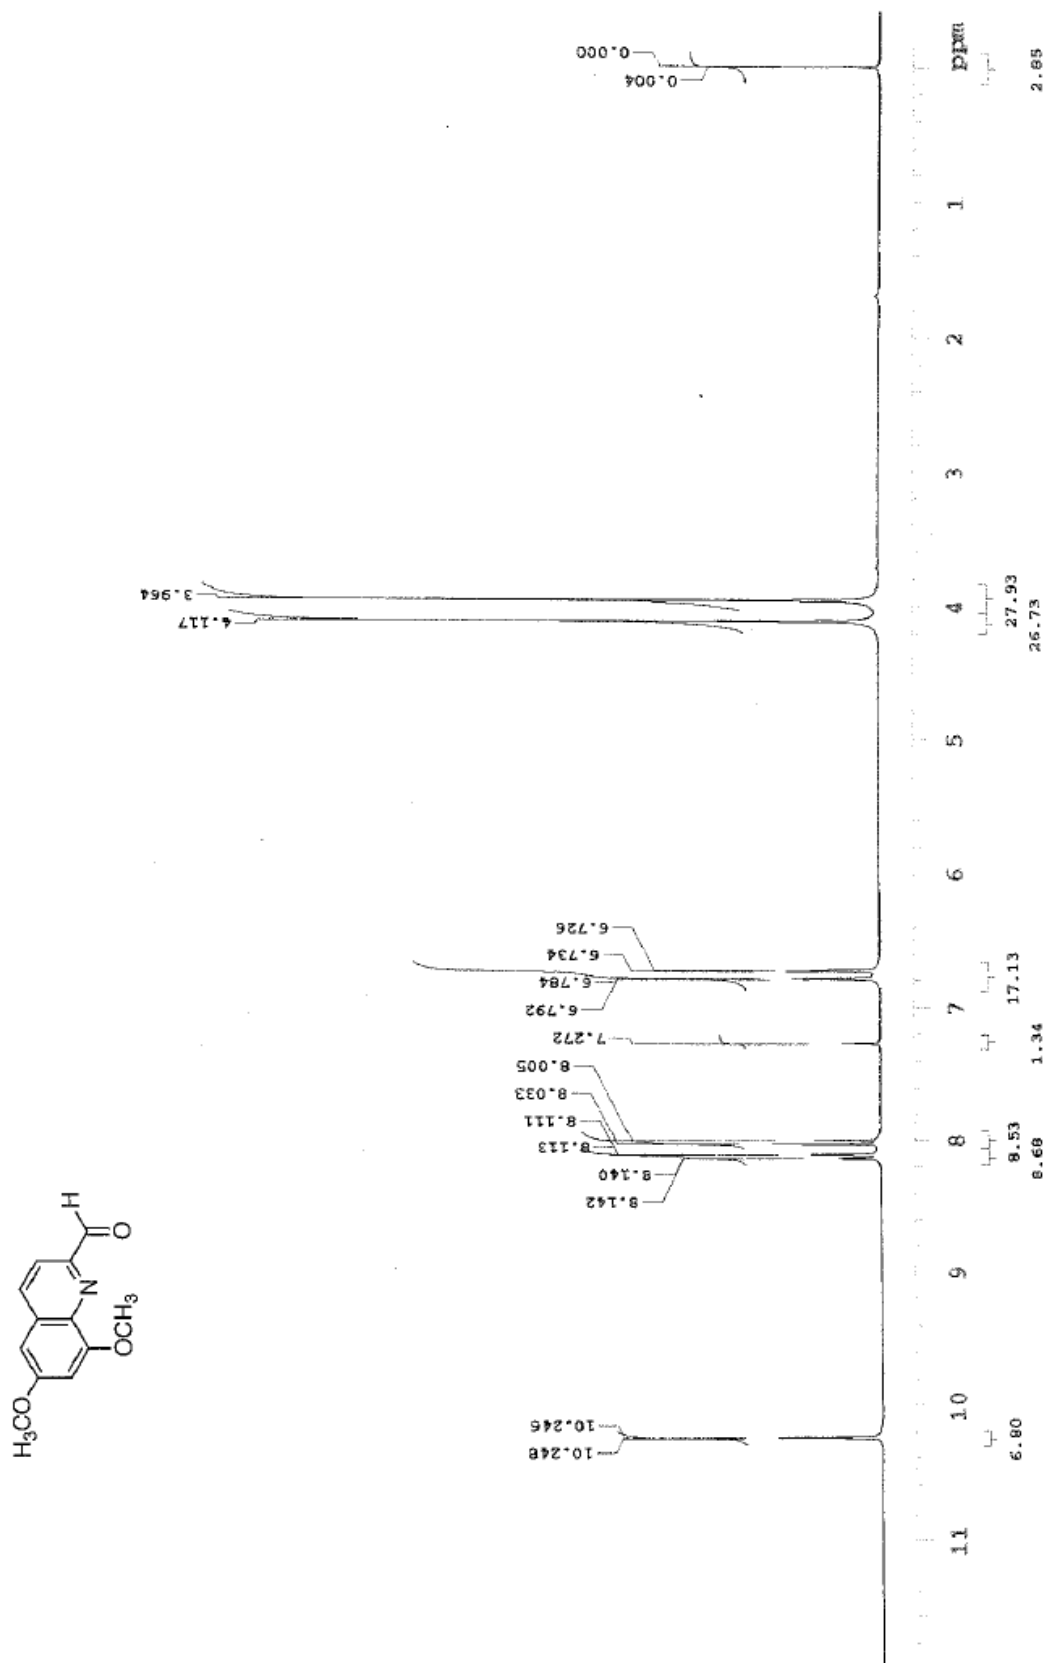

Fig. S17 <sup>1</sup>H NMR spectrum of 6,8-dimethoxy-2-quinolinecarbaldehyde in CDCl<sub>3</sub>.



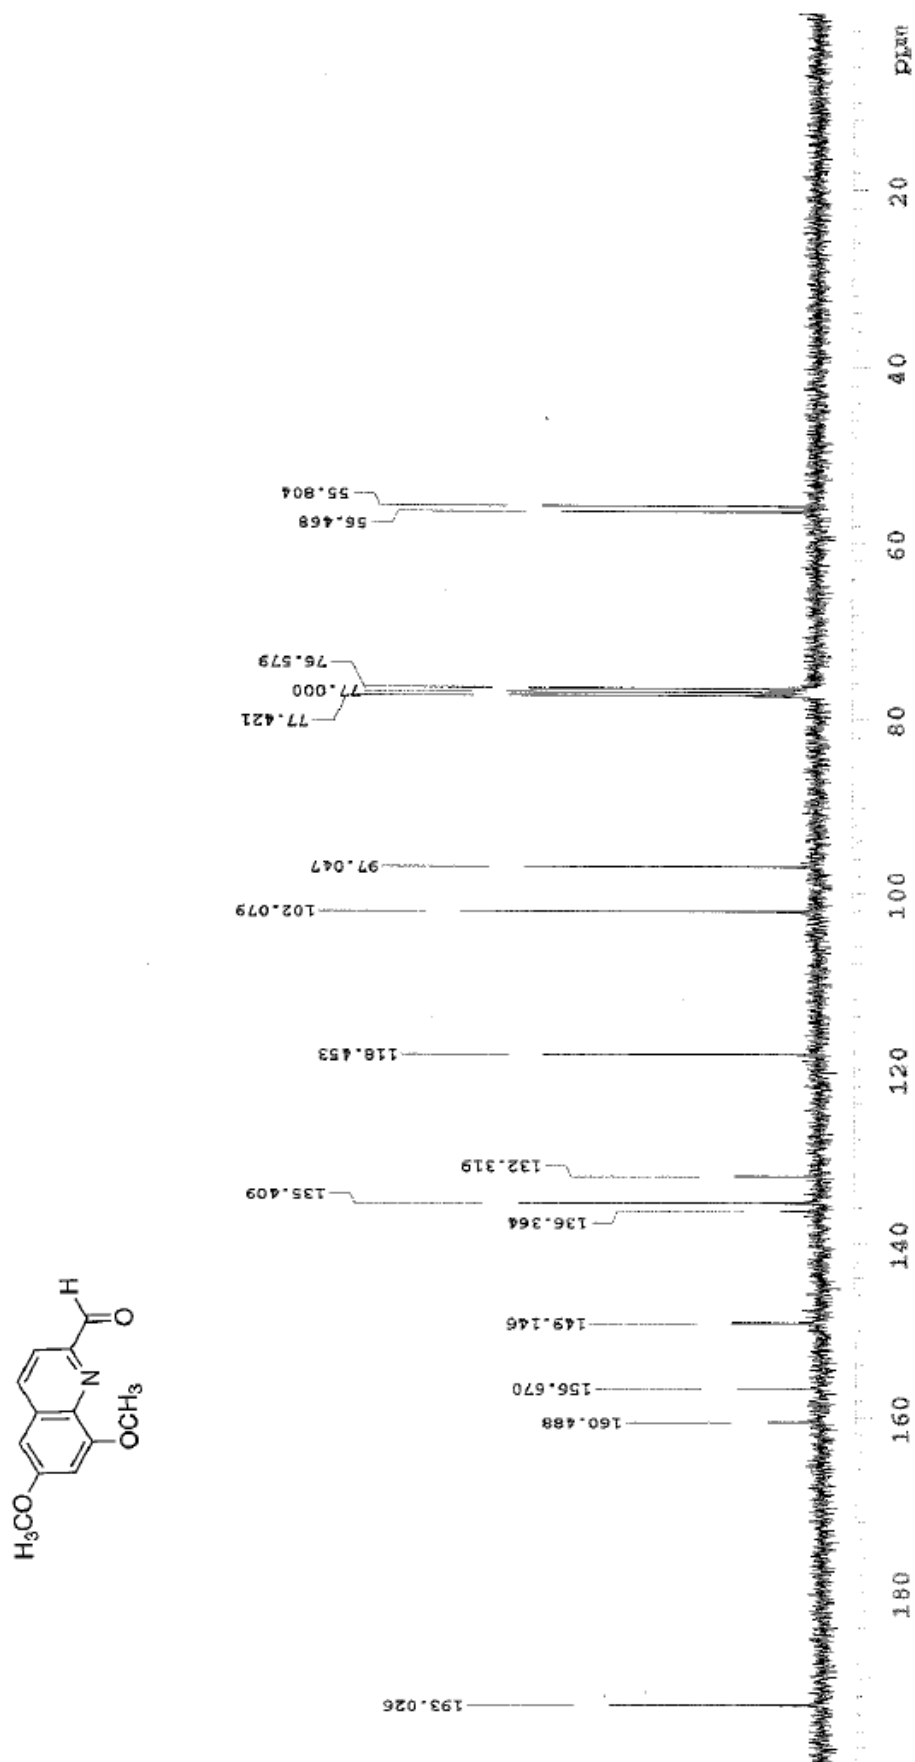

Fig. S18 <sup>13</sup>C NMR spectrum of 6,8-dimethoxy-2-quinolinecarbaldehyde in CDCl<sub>3</sub>.

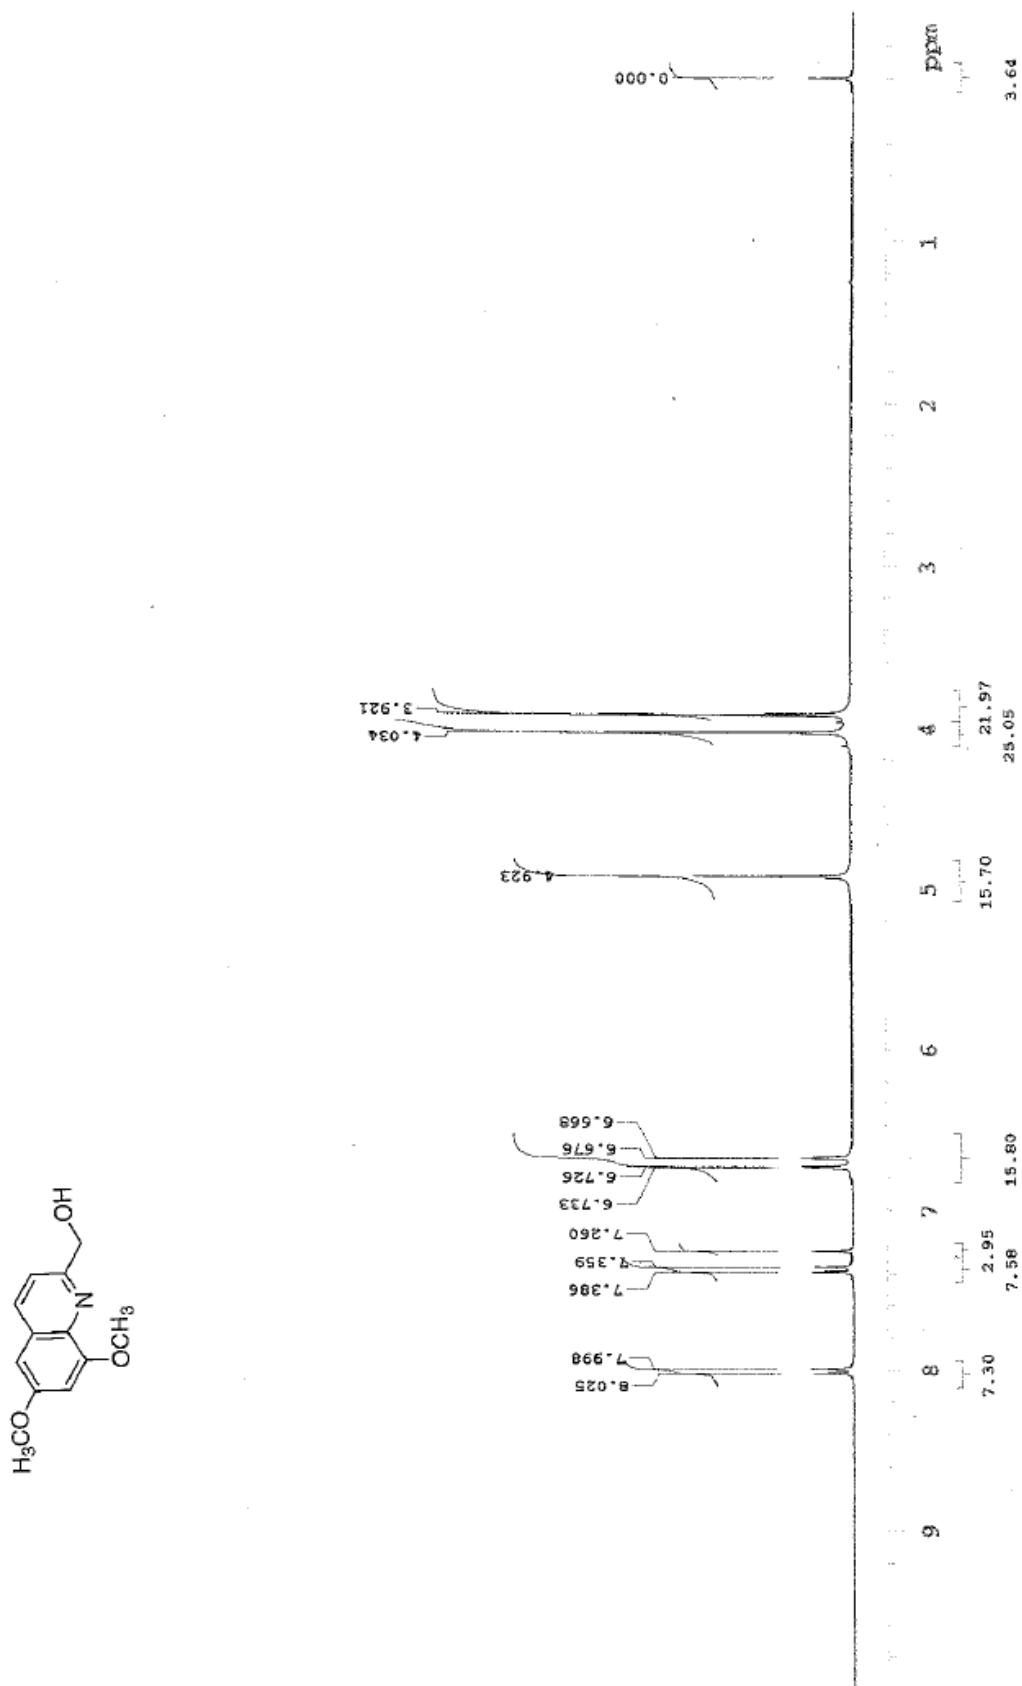

Fig. S19 <sup>1</sup>H NMR spectrum of 6,8-dimethoxy-2-hydroxymethylquinoline in CDCl<sub>3</sub>.

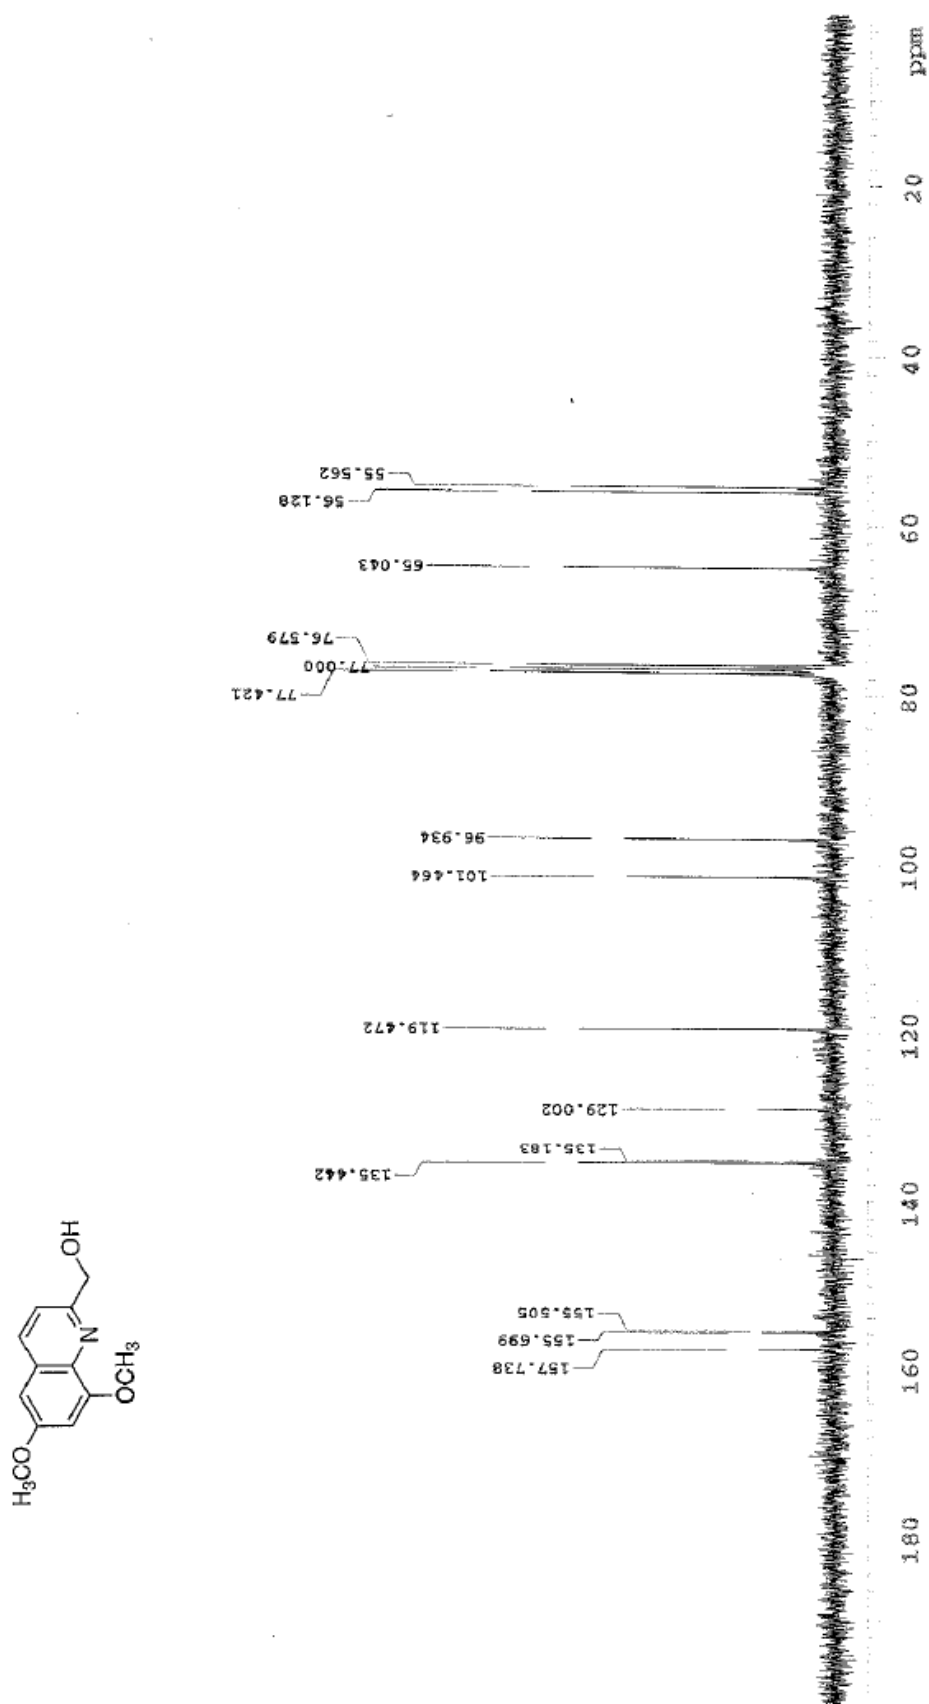

Fig. S20 <sup>13</sup>C NMR spectrum of 6,8-dimethoxy-2-hydroxymethylquinoline in CDCl<sub>3</sub>.

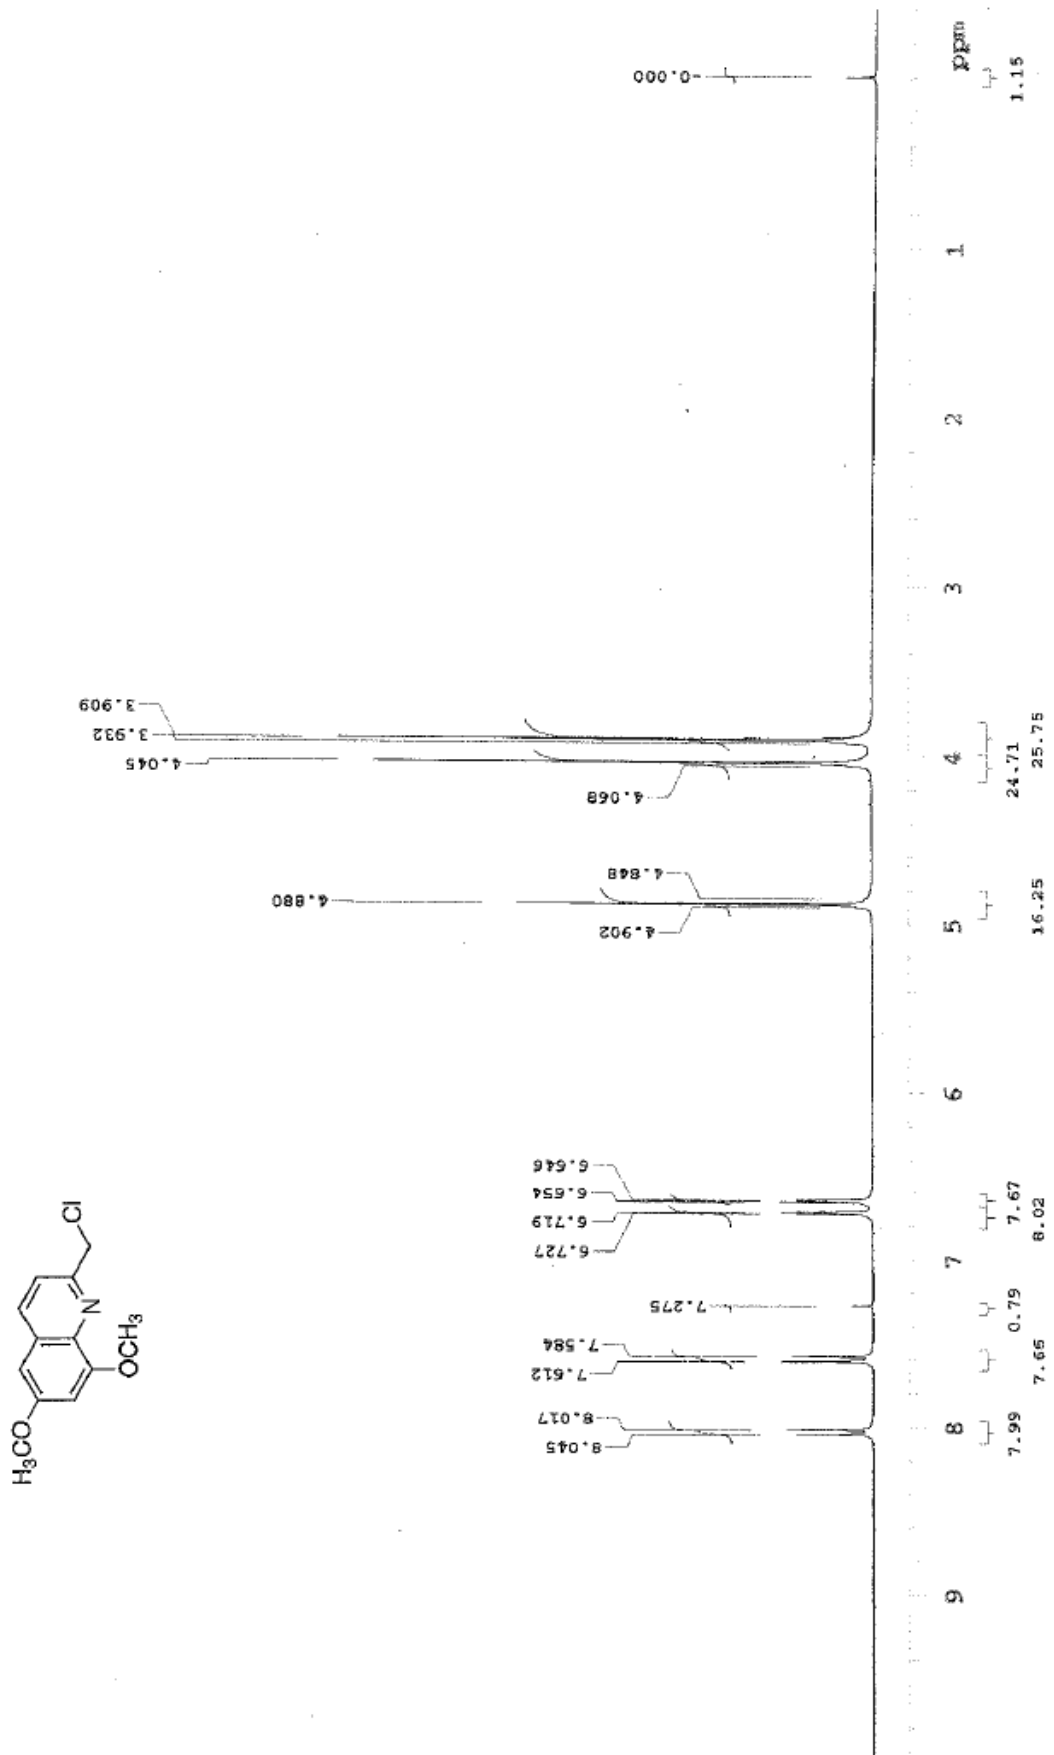

Fig. S21 <sup>1</sup>H NMR spectrum of 6,8-dimethoxy-2-chloromethylquinoline in CDCl<sub>3</sub>.

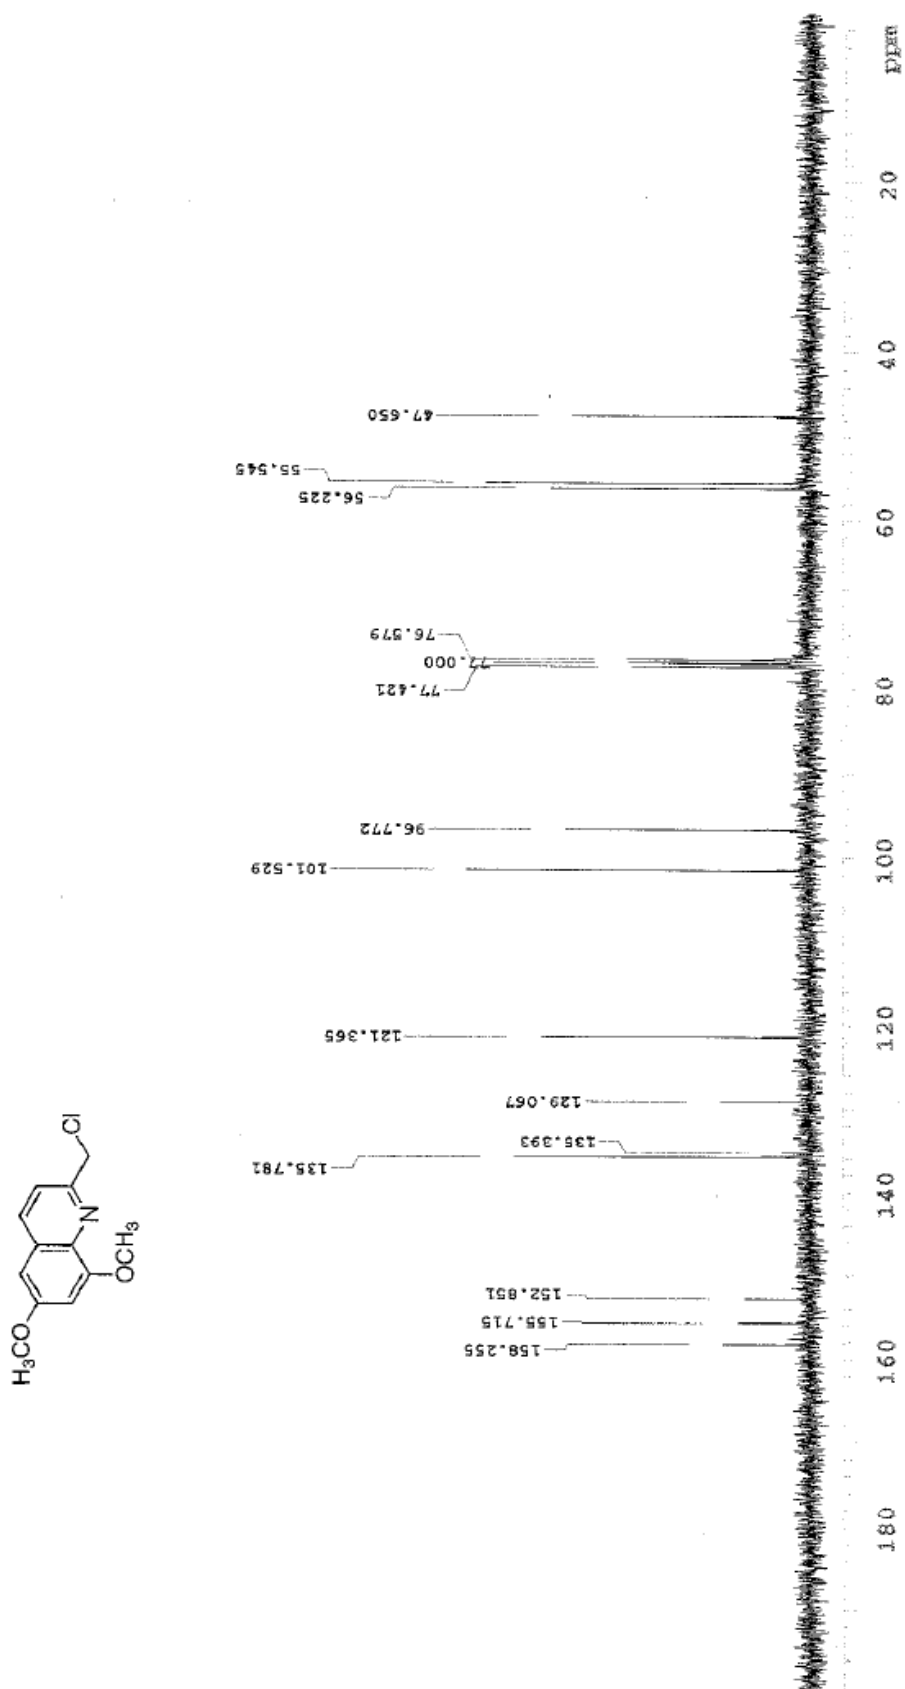

Fig. S22 <sup>13</sup>C NMR spectrum of 6,8-dimethoxy-2-chloromethylquinoline in CDCl<sub>3</sub>.

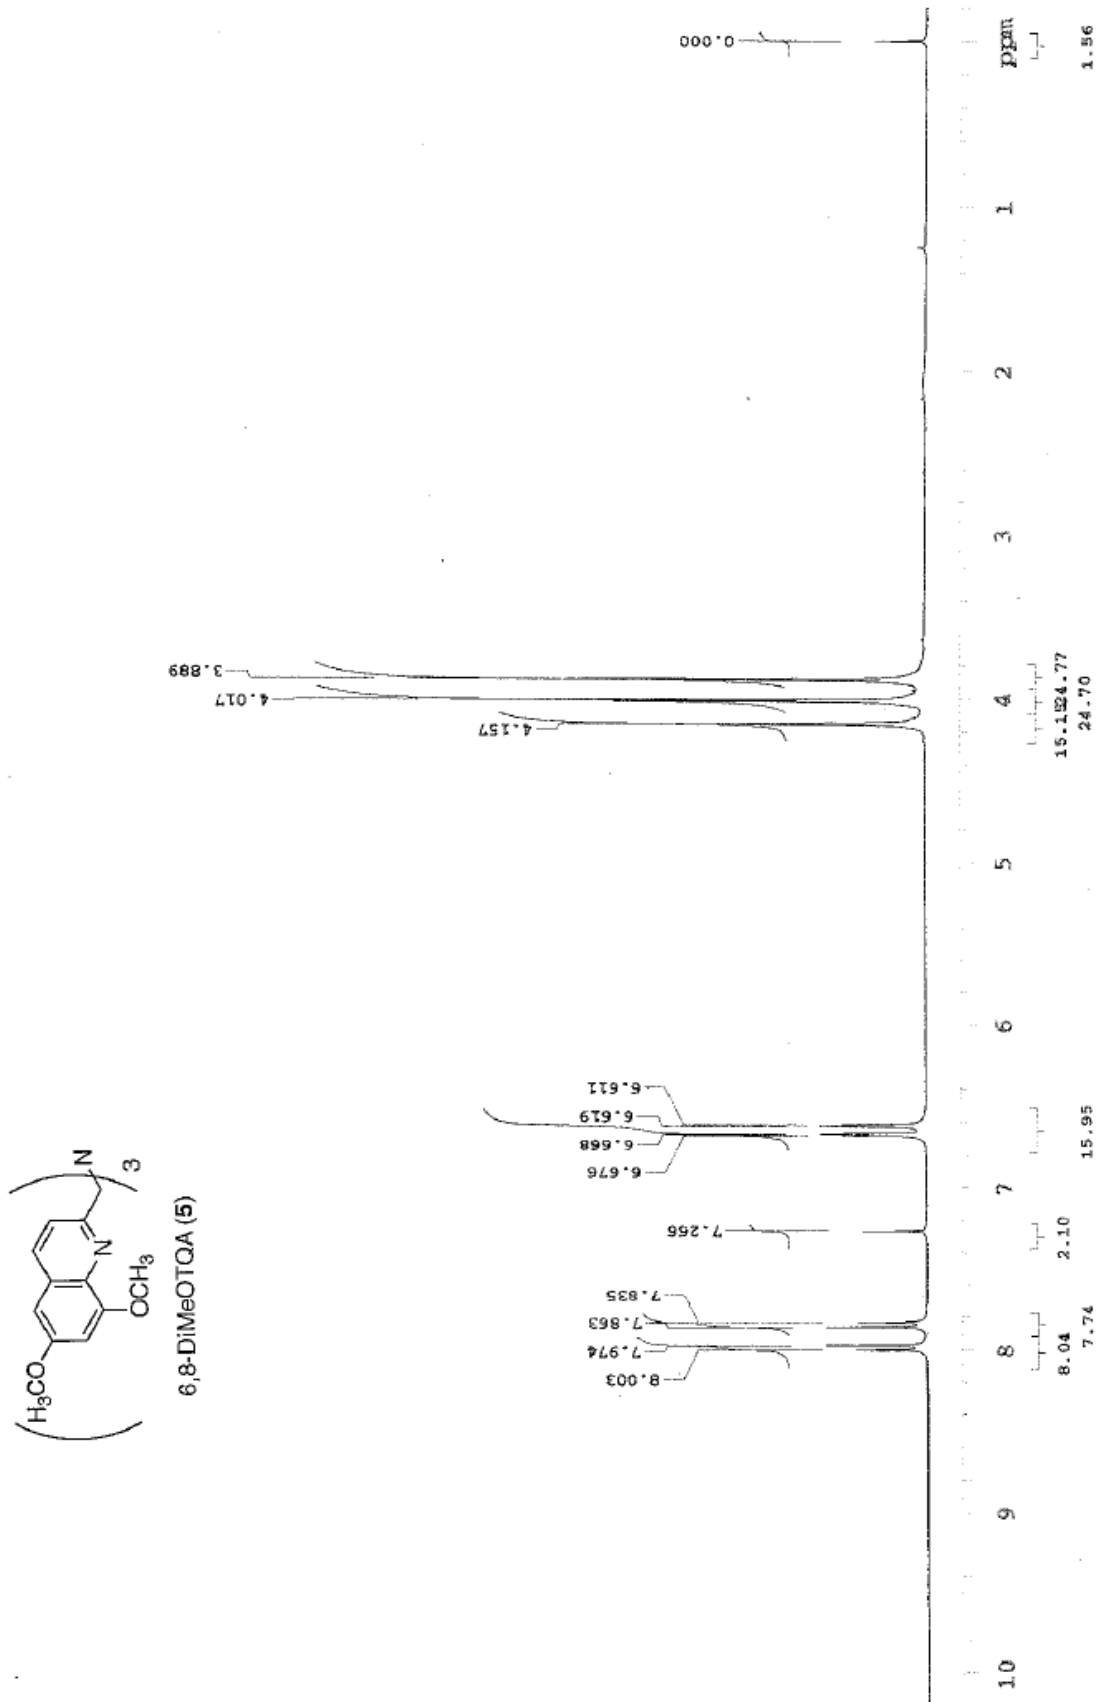

Fig. S23 <sup>1</sup>H NMR spectrum of 6,8-DiMeOTQA (5) in CDCl<sub>3</sub>.

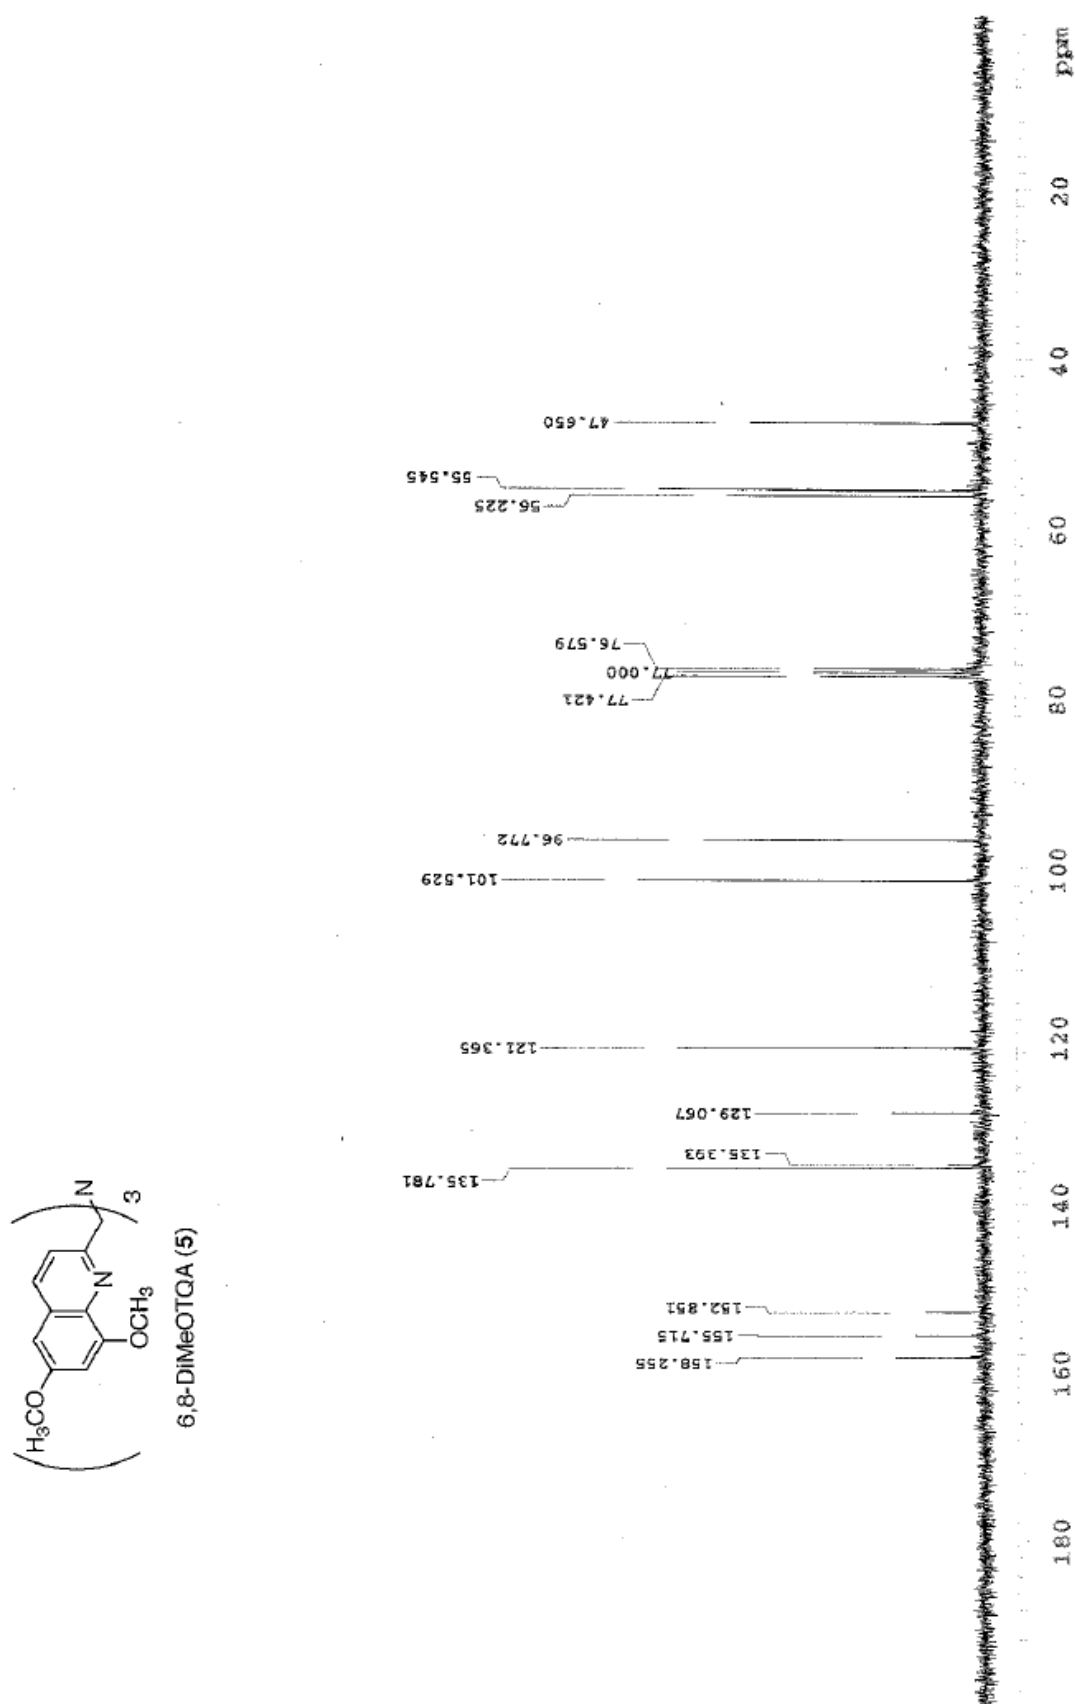

Fig. S24 <sup>13</sup>C NMR spectrum of 6,8-DiMeOTQA (5) in CDCl<sub>3</sub>.

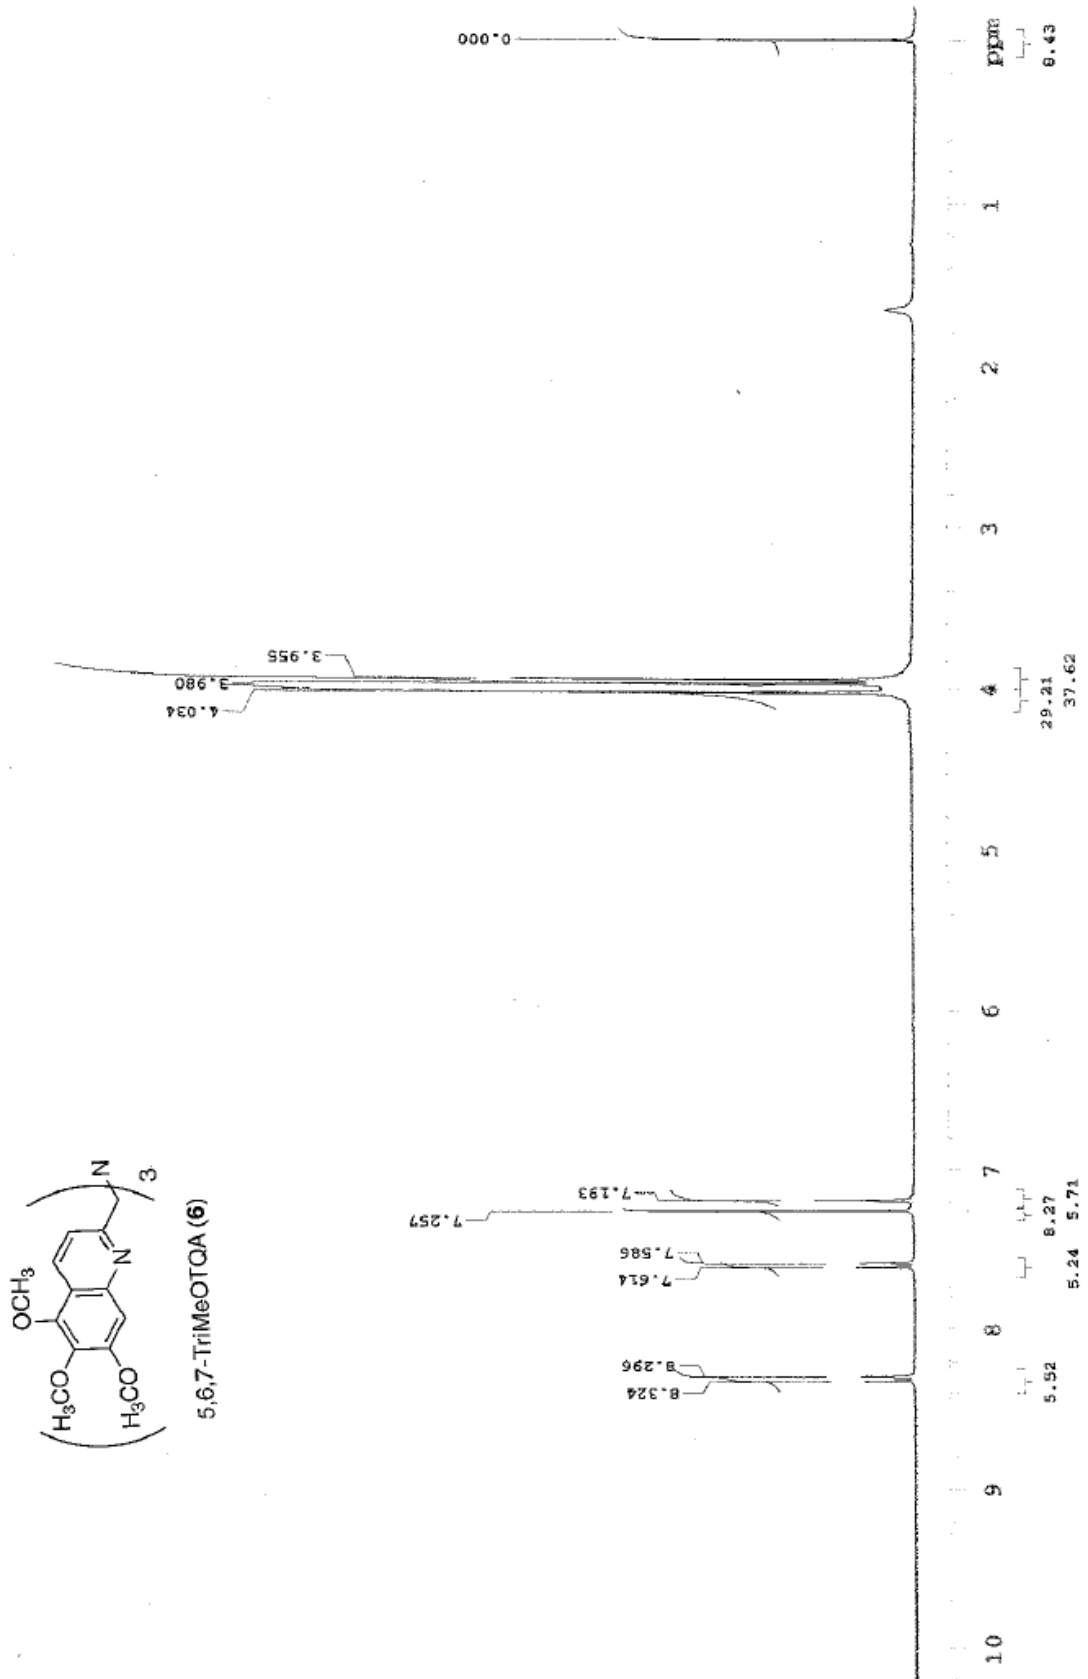

Fig. S25 <sup>1</sup>H NMR spectrum of 5,6,7-TriMeOTQA (6) in CDCl<sub>3</sub>.



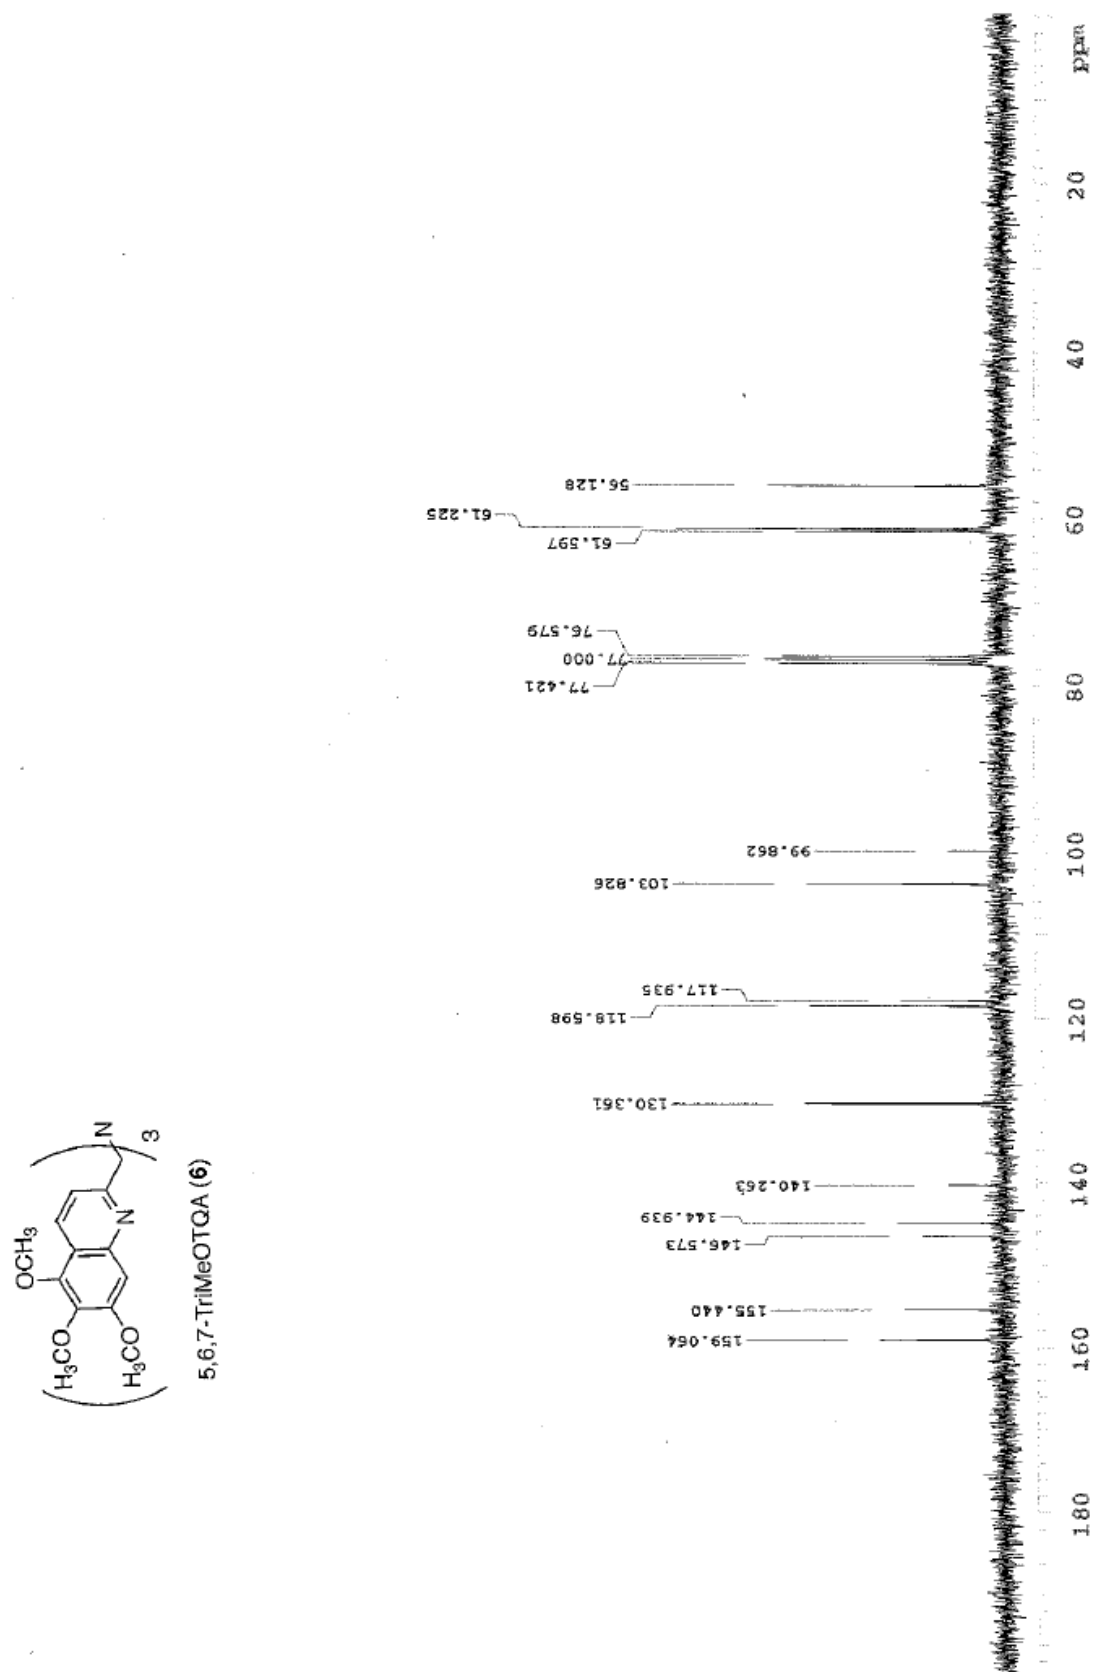

Fig. S26  $^{13}\text{C}$  NMR spectrum of 5,6,7-TriMeOTQA (6) in  $\text{CDCl}_3$ .

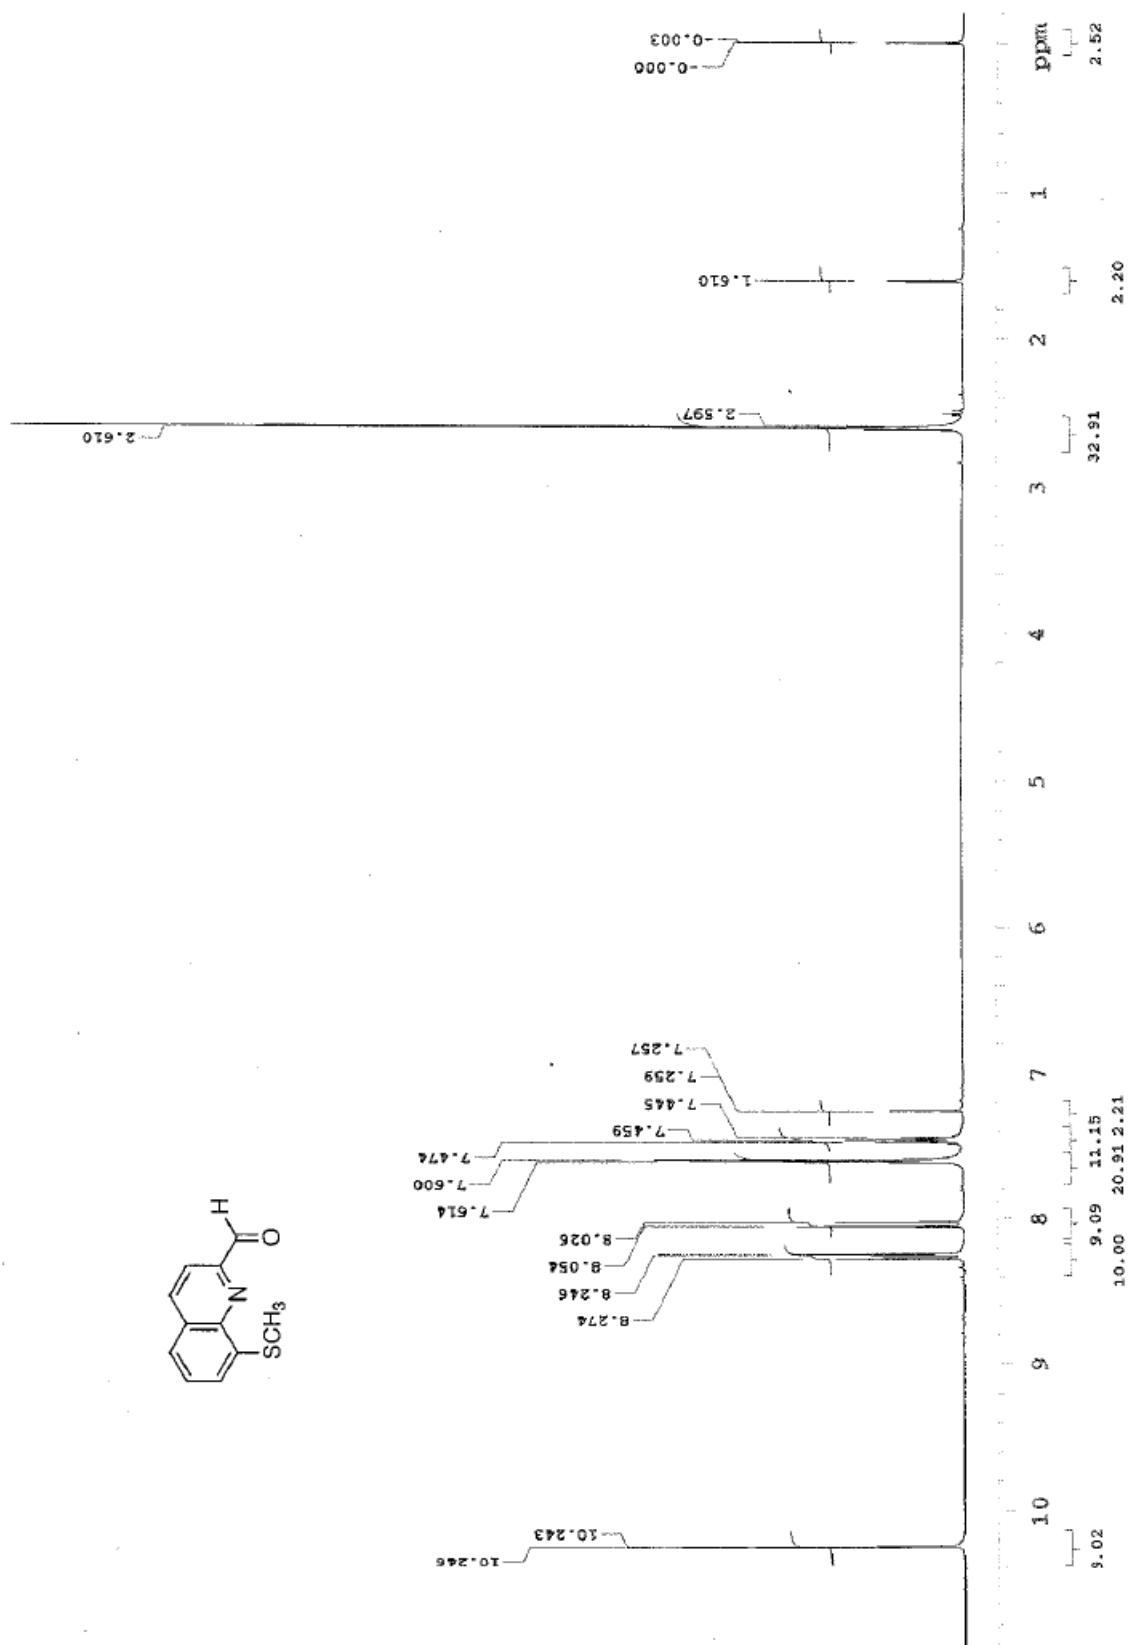

Fig. S27 <sup>1</sup>H NMR spectrum of 8-methylthioquinoline-2-carbaldehyde in CDCl<sub>3</sub>.

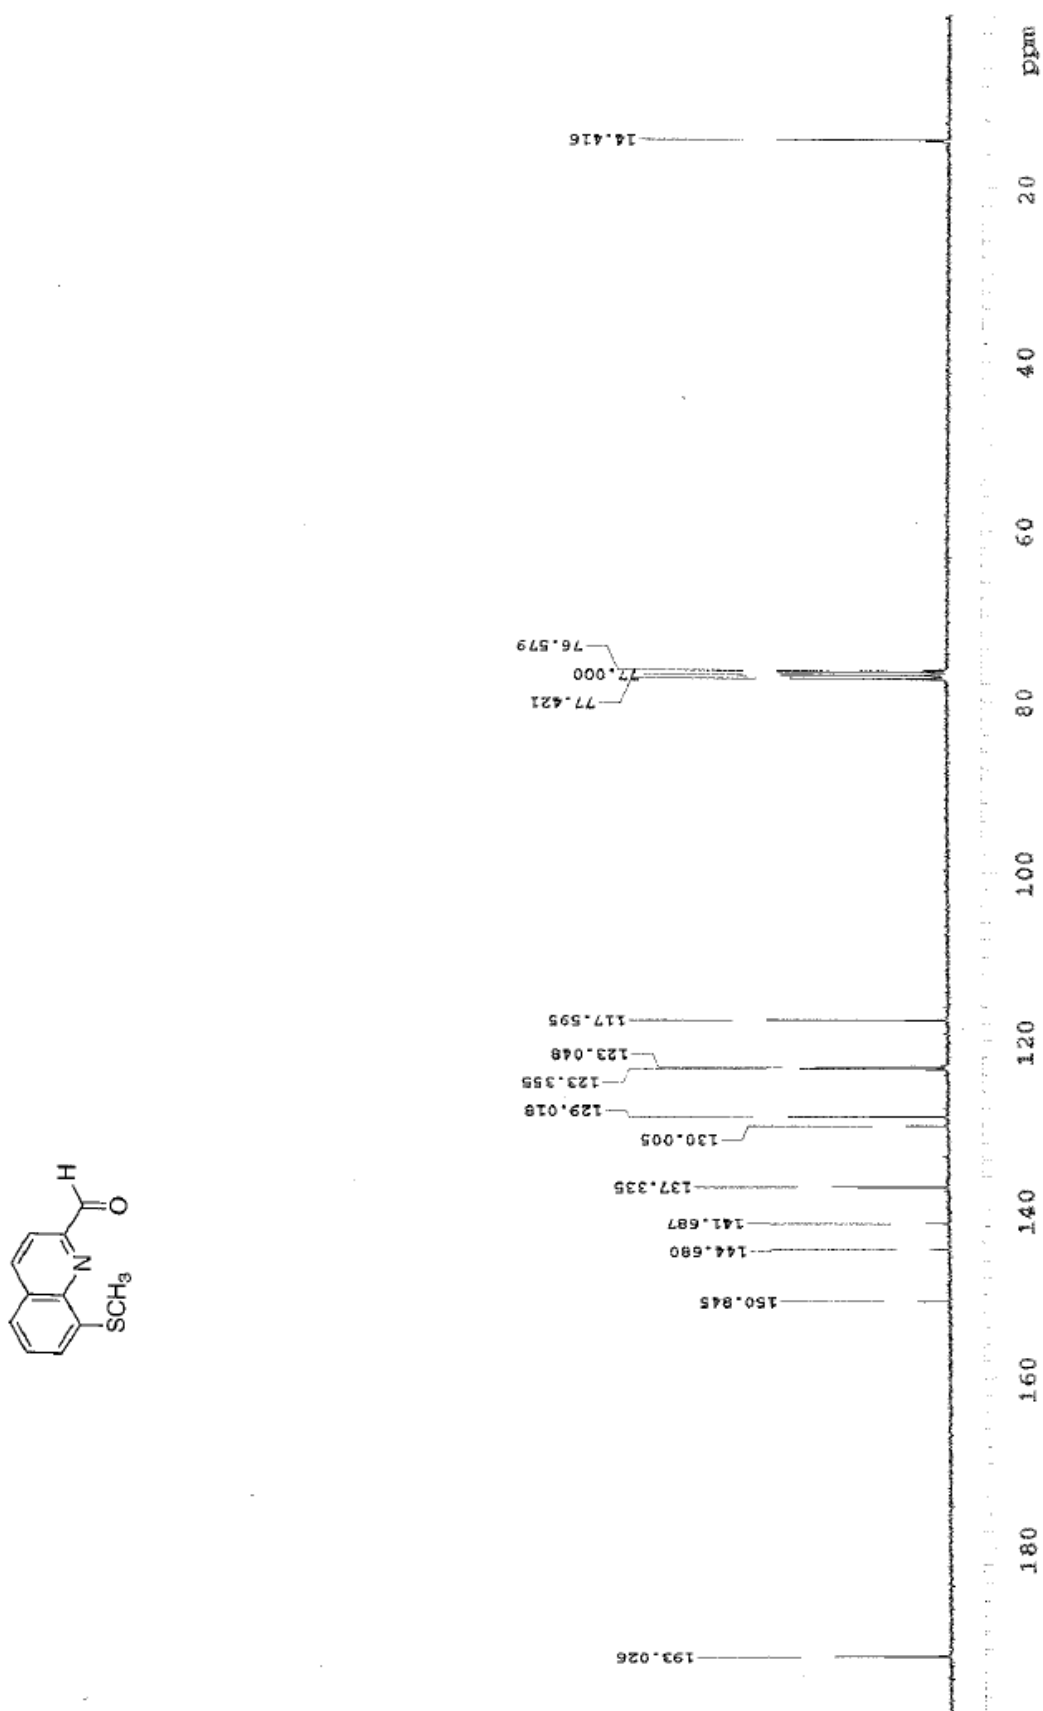

Fig. S28 <sup>13</sup>C NMR spectrum of 8-methylthioquinoline-2-carbaldehyde in CDCl<sub>3</sub>.

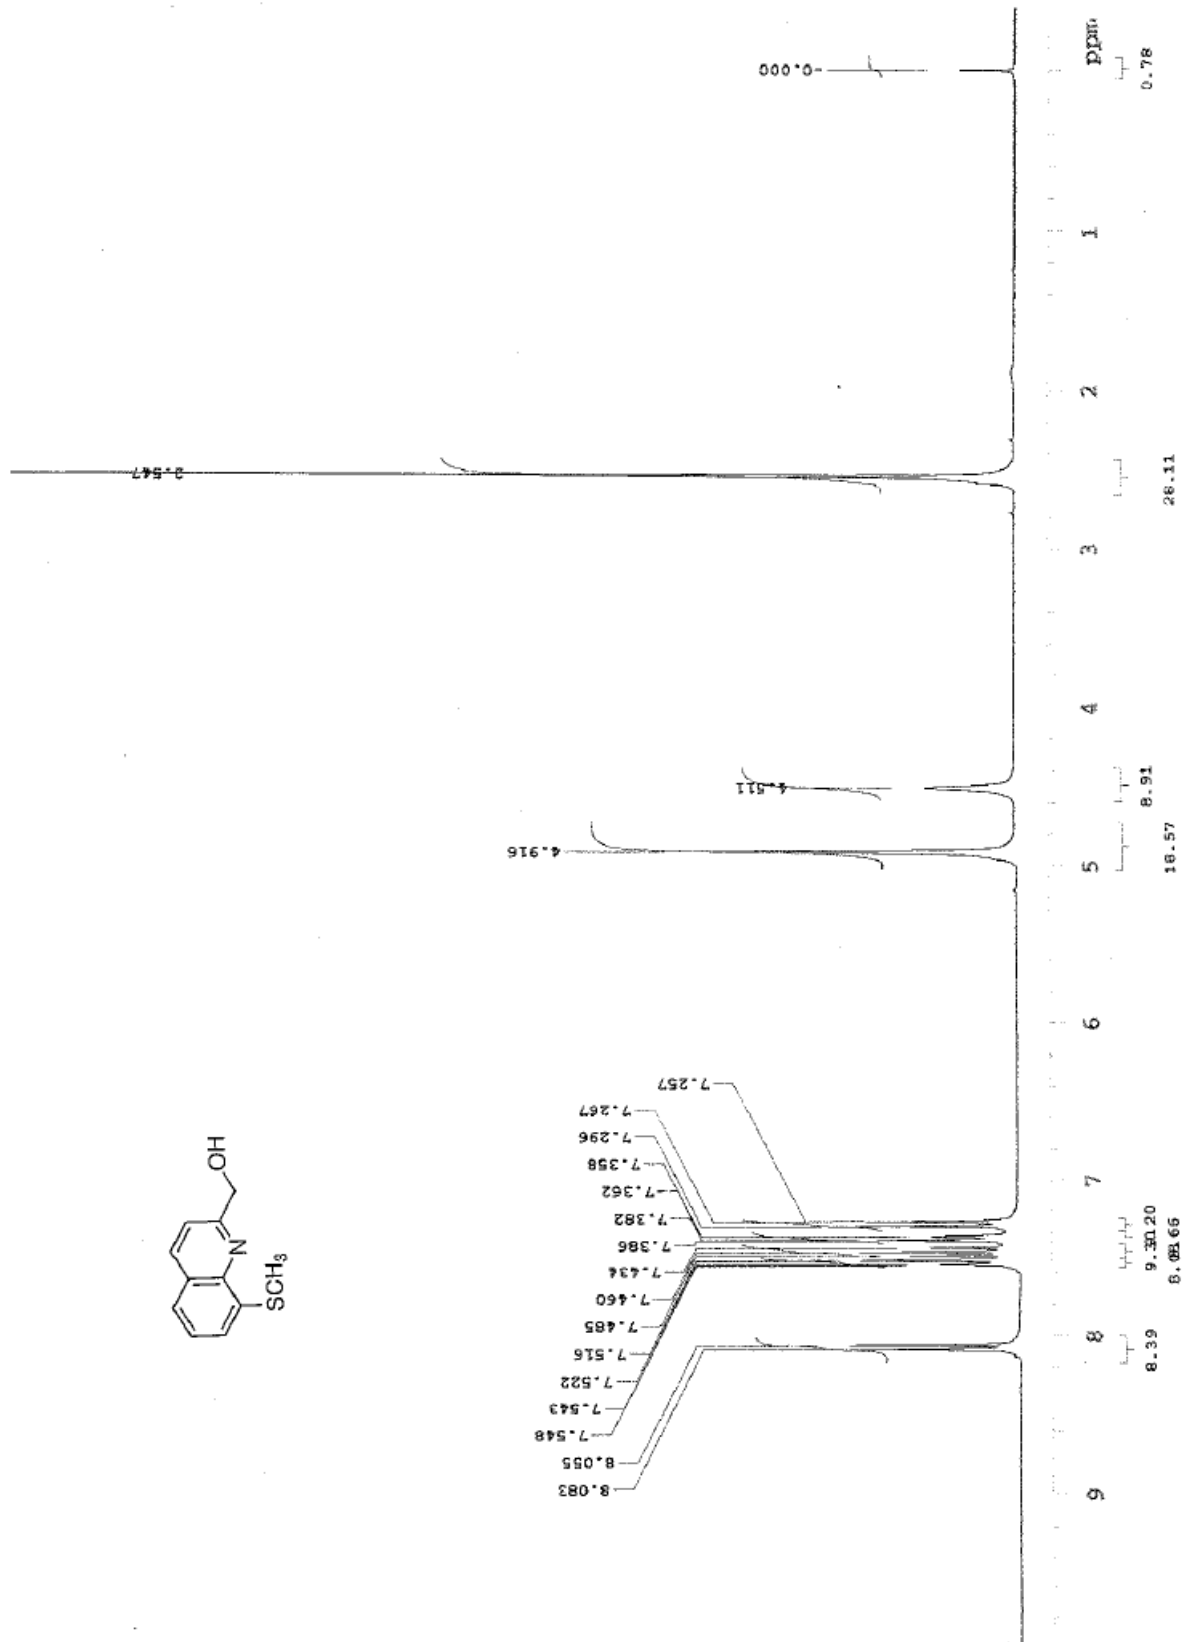

Fig. S29 <sup>1</sup>H NMR spectrum of 8-methylthio-2-hydroxymethylquinoline in CDCl<sub>3</sub>.

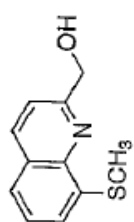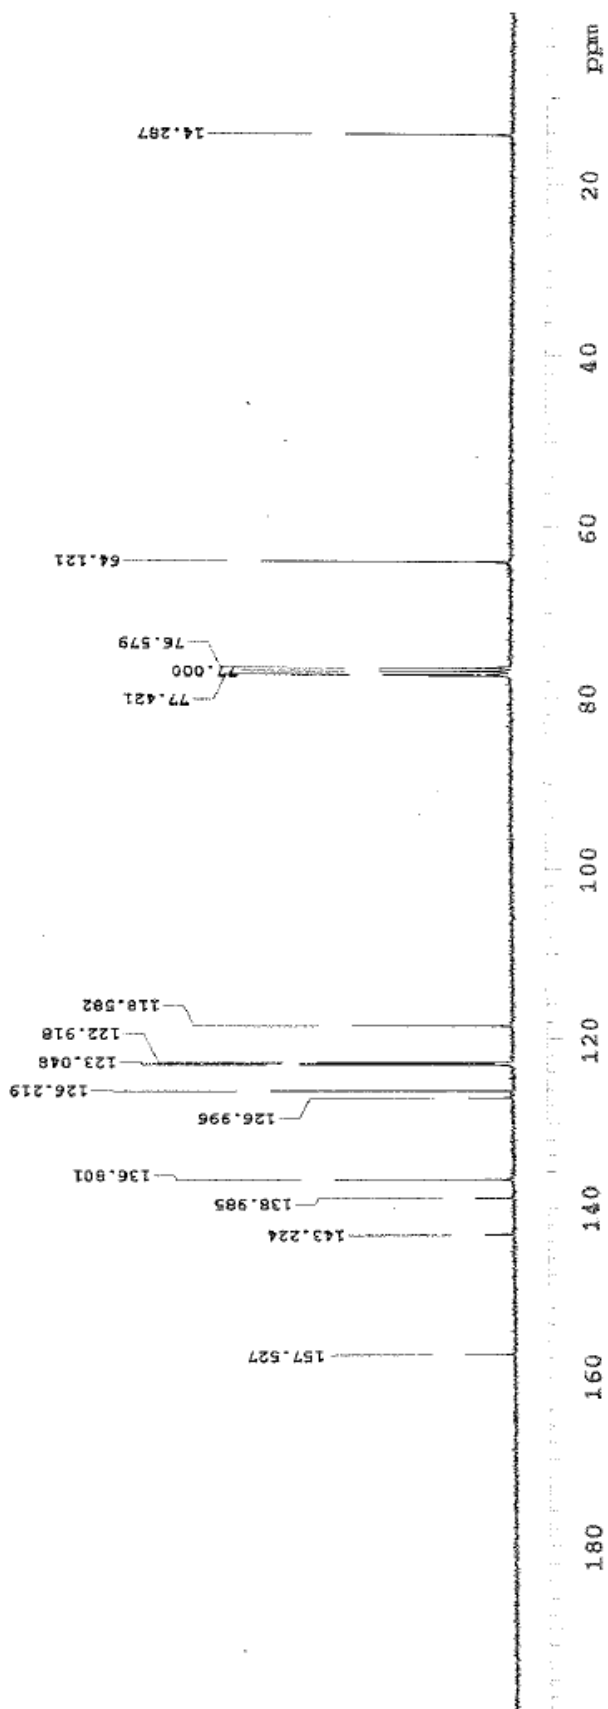

Fig. S30 <sup>13</sup>C NMR spectrum of 8-methylthio-2-hydroxymethylquinoline in CDCl<sub>3</sub>.

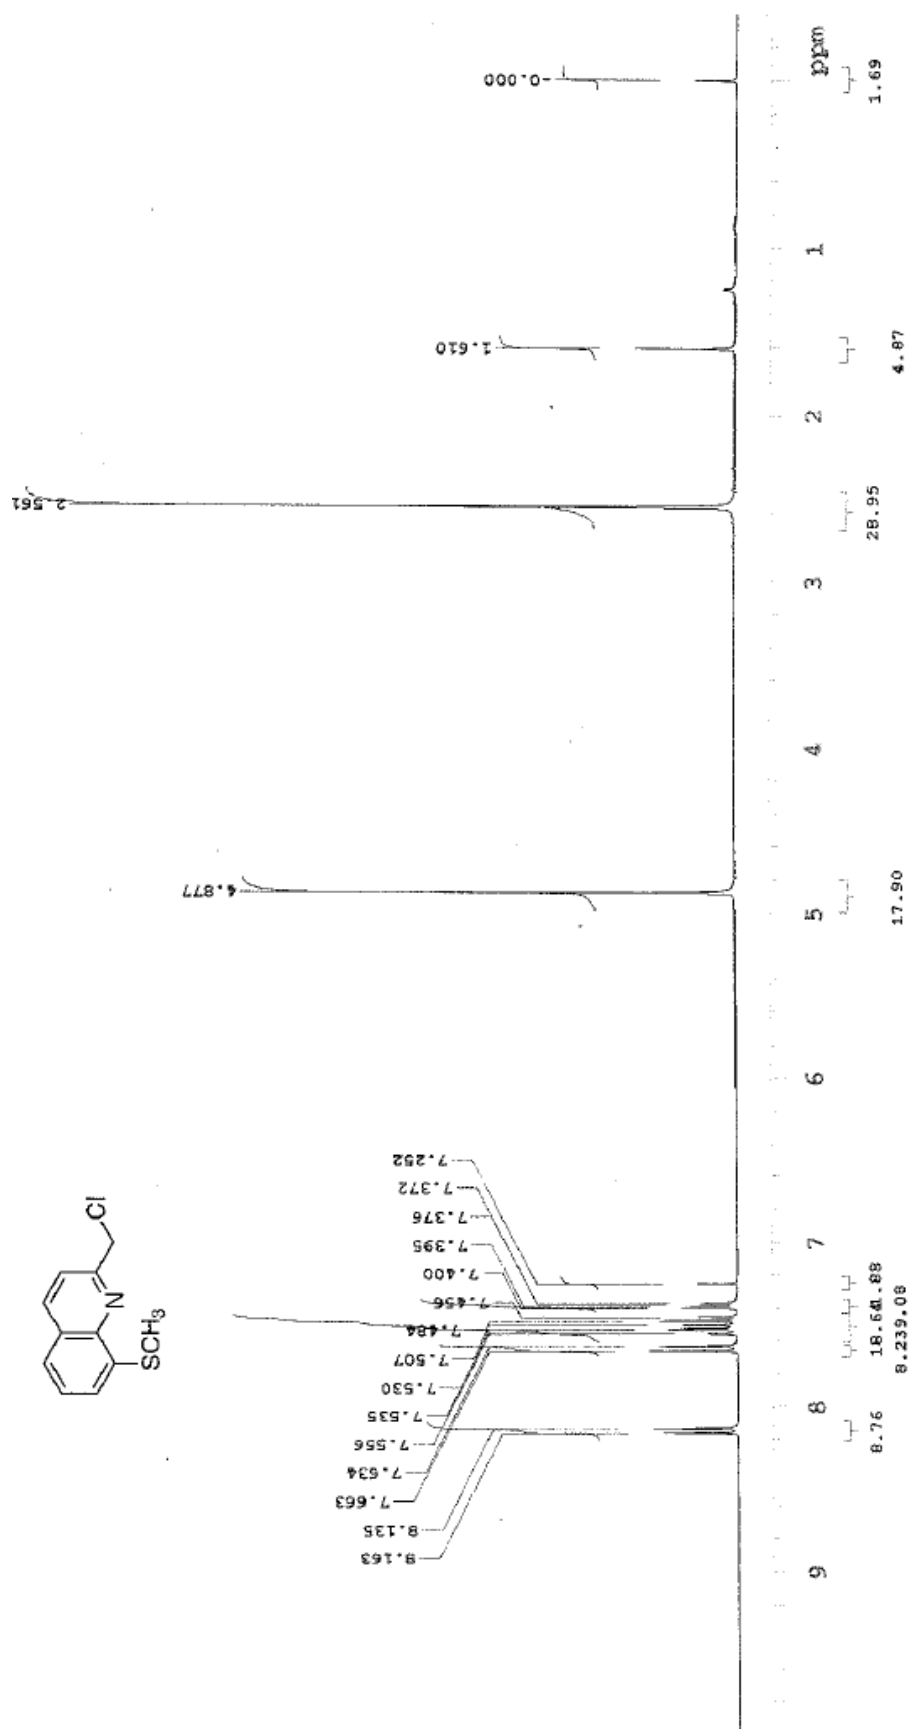

Fig. S31  $^1\text{H}$  NMR spectrum of 8-methylthio-2-chloromethylquinoline in  $\text{CDCl}_3$ .

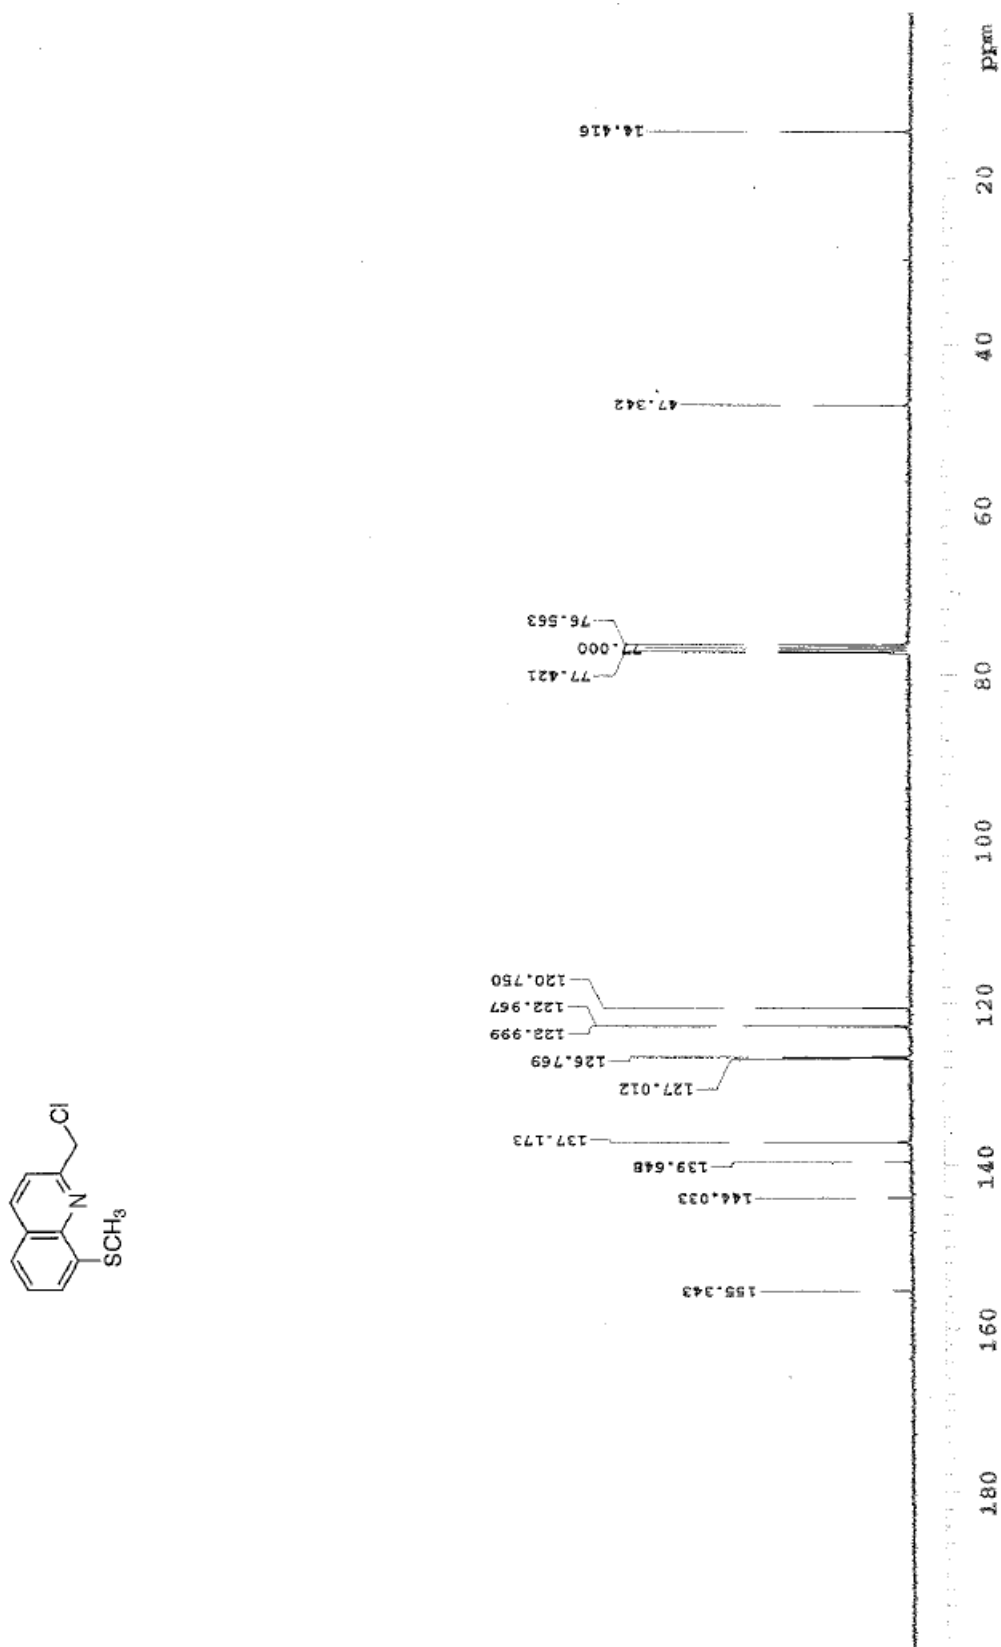

Fig. S32 <sup>13</sup>C NMR spectrum of 8-methylthio-2-chloromethylquinoline in CDCl<sub>3</sub>.

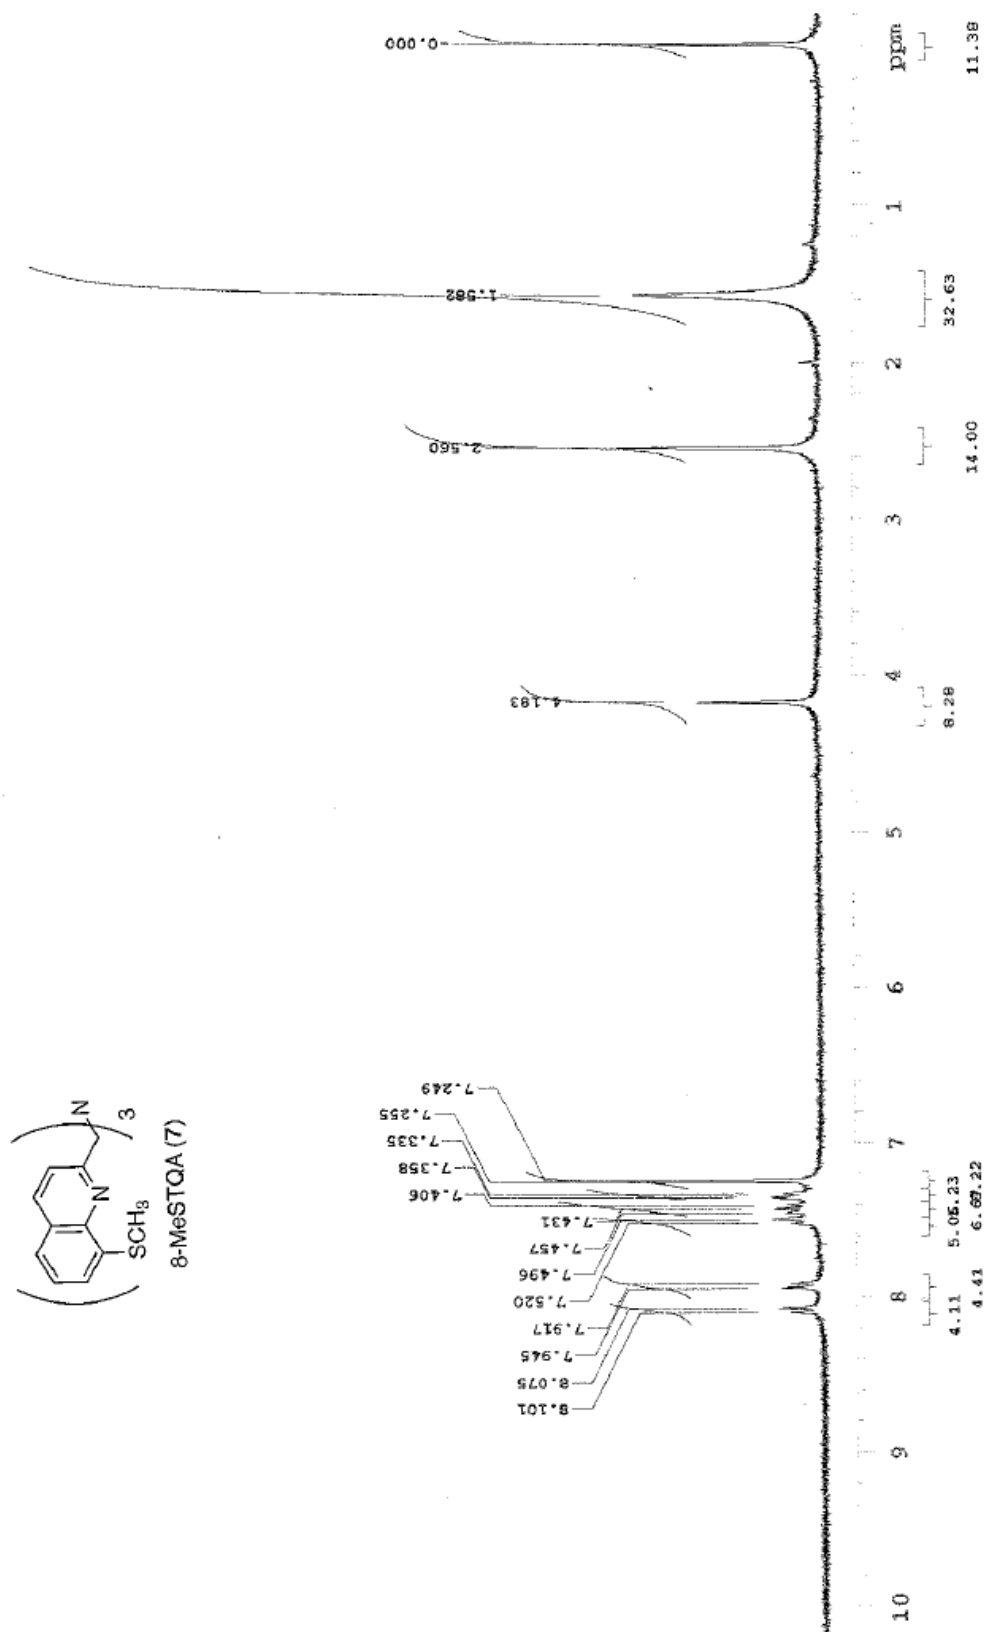

Fig. S33 <sup>1</sup>H NMR spectrum of 8-MeSTQA (7) in CDCl<sub>3</sub>.



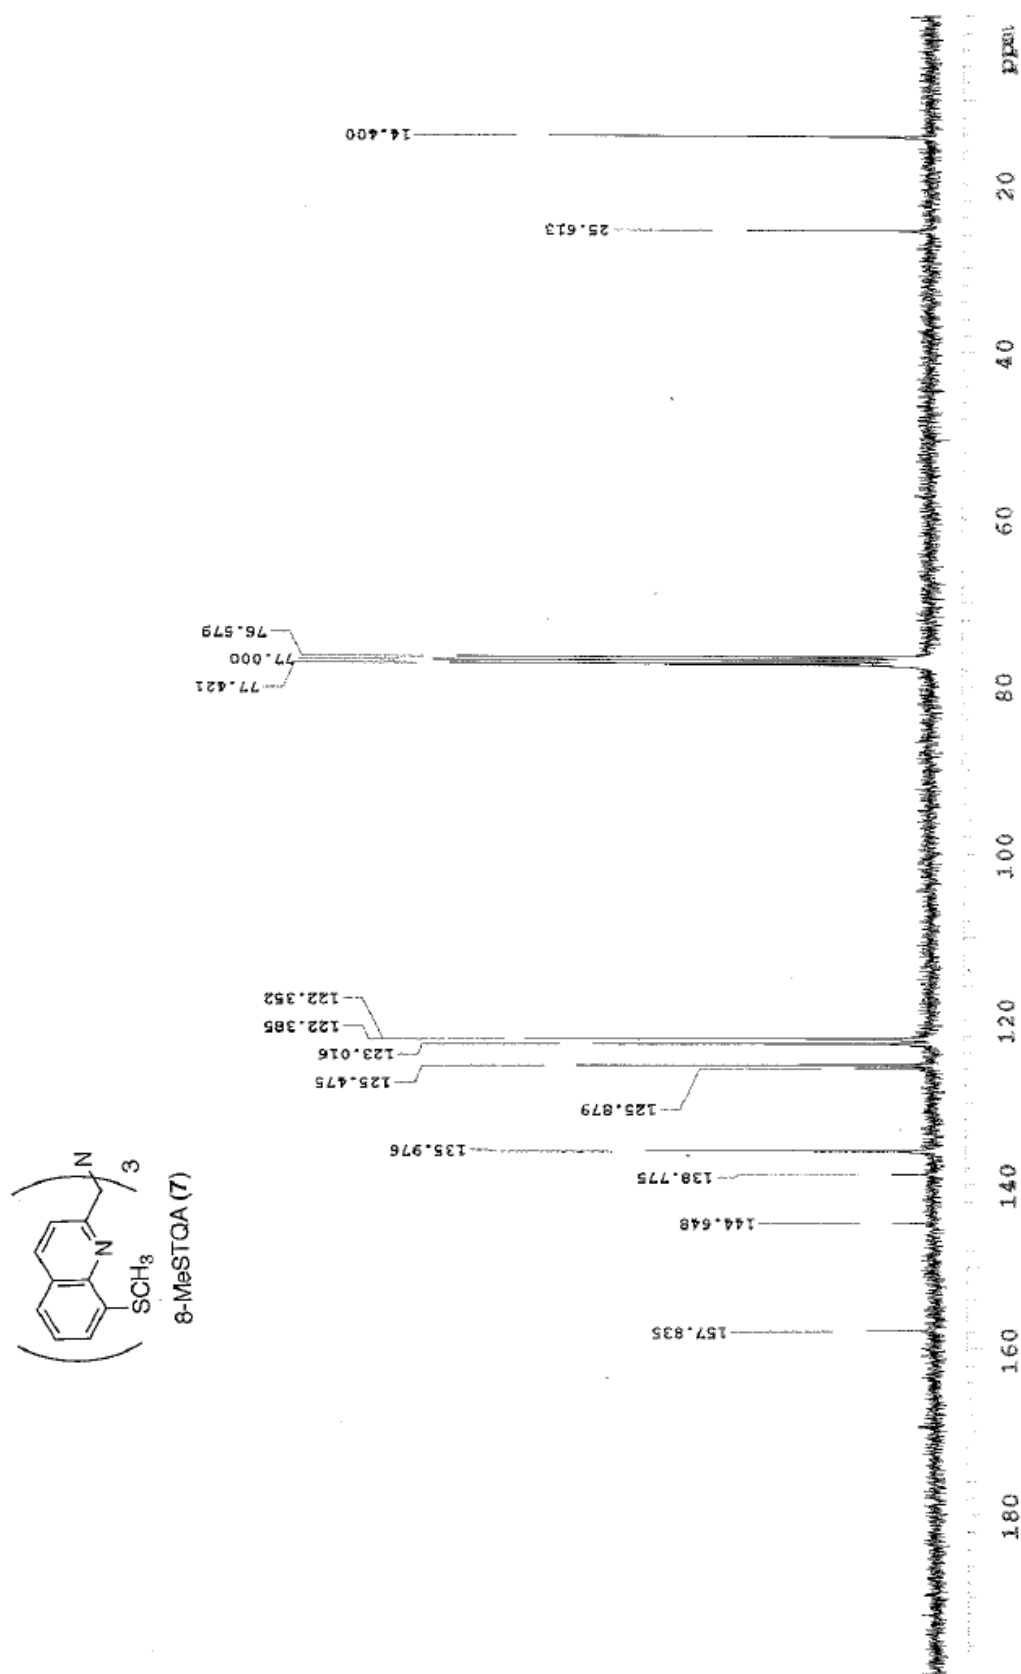

Fig. S34 <sup>13</sup>C NMR spectrum of 8-MeSTQA (7) in CDCl<sub>3</sub>.

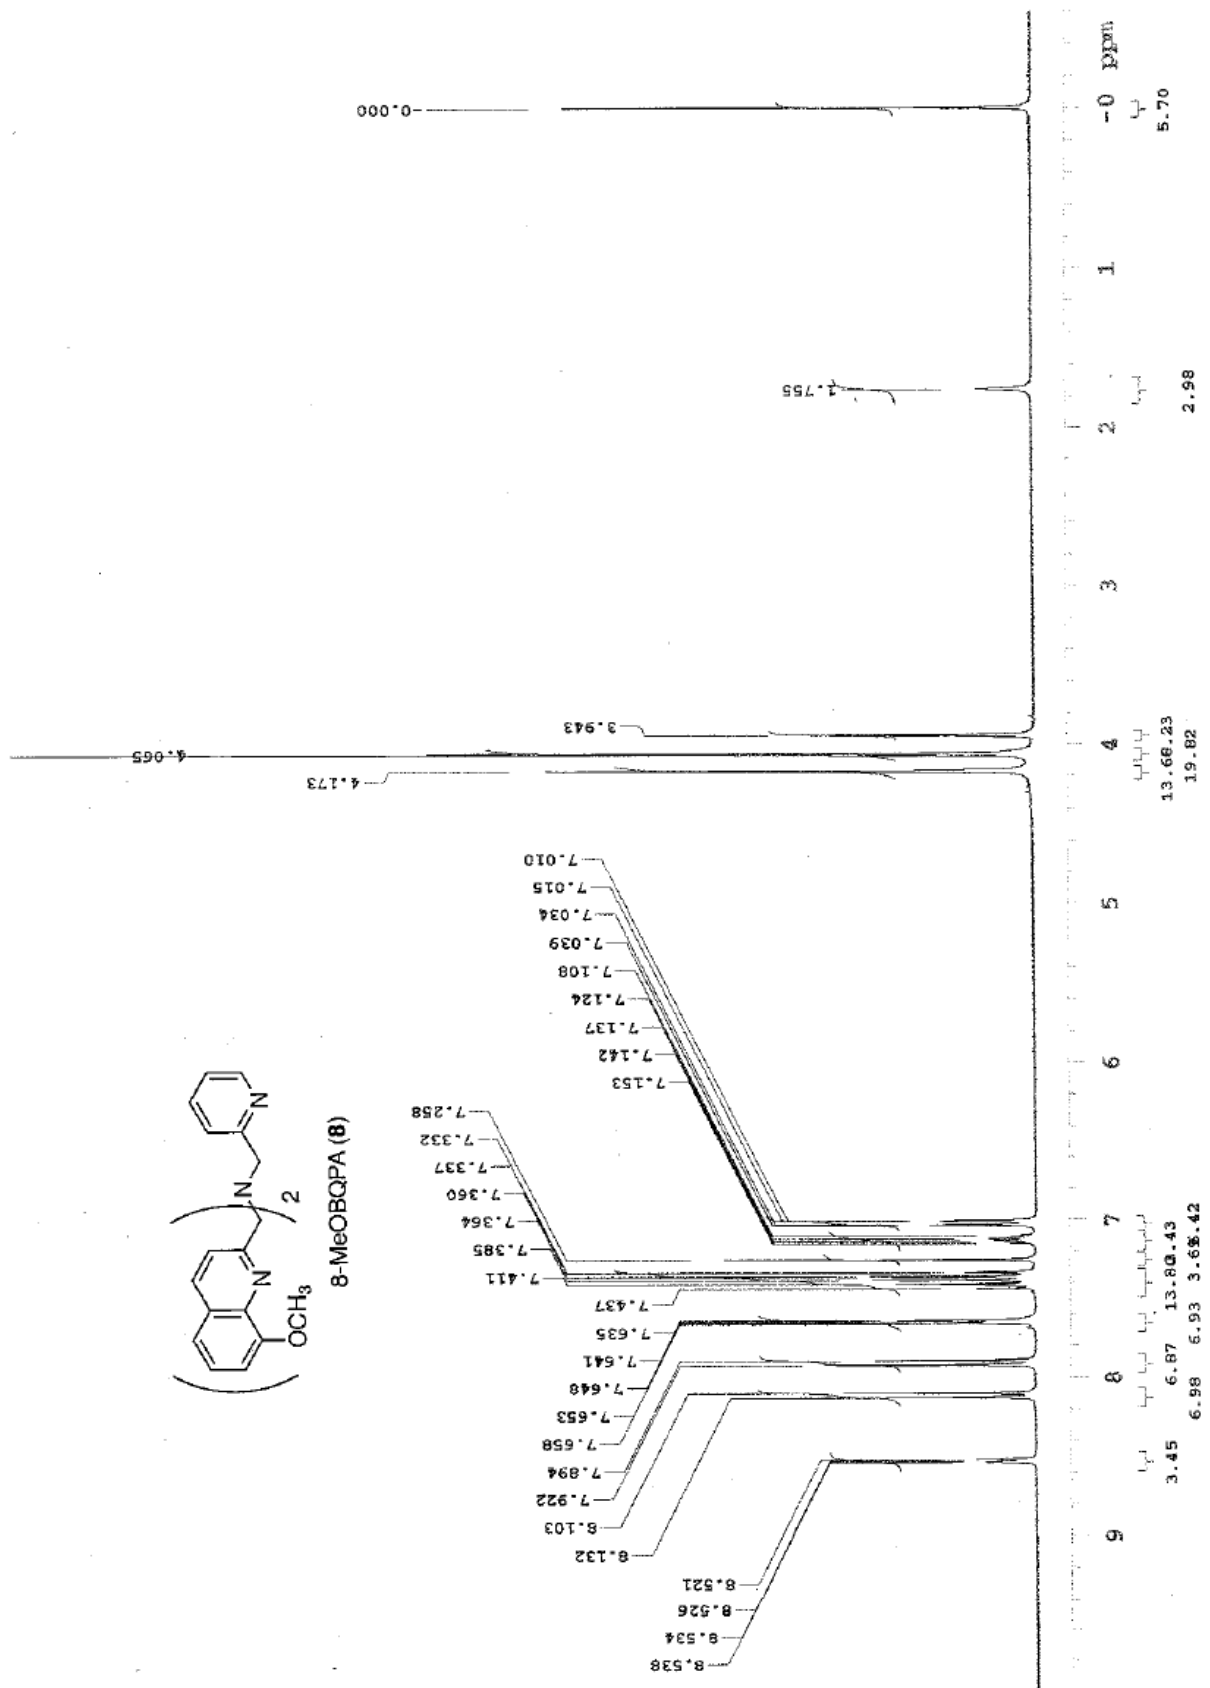

Fig. S35 <sup>1</sup>H NMR spectrum of 8-MeOBQPA (8) in CDCl<sub>3</sub>.

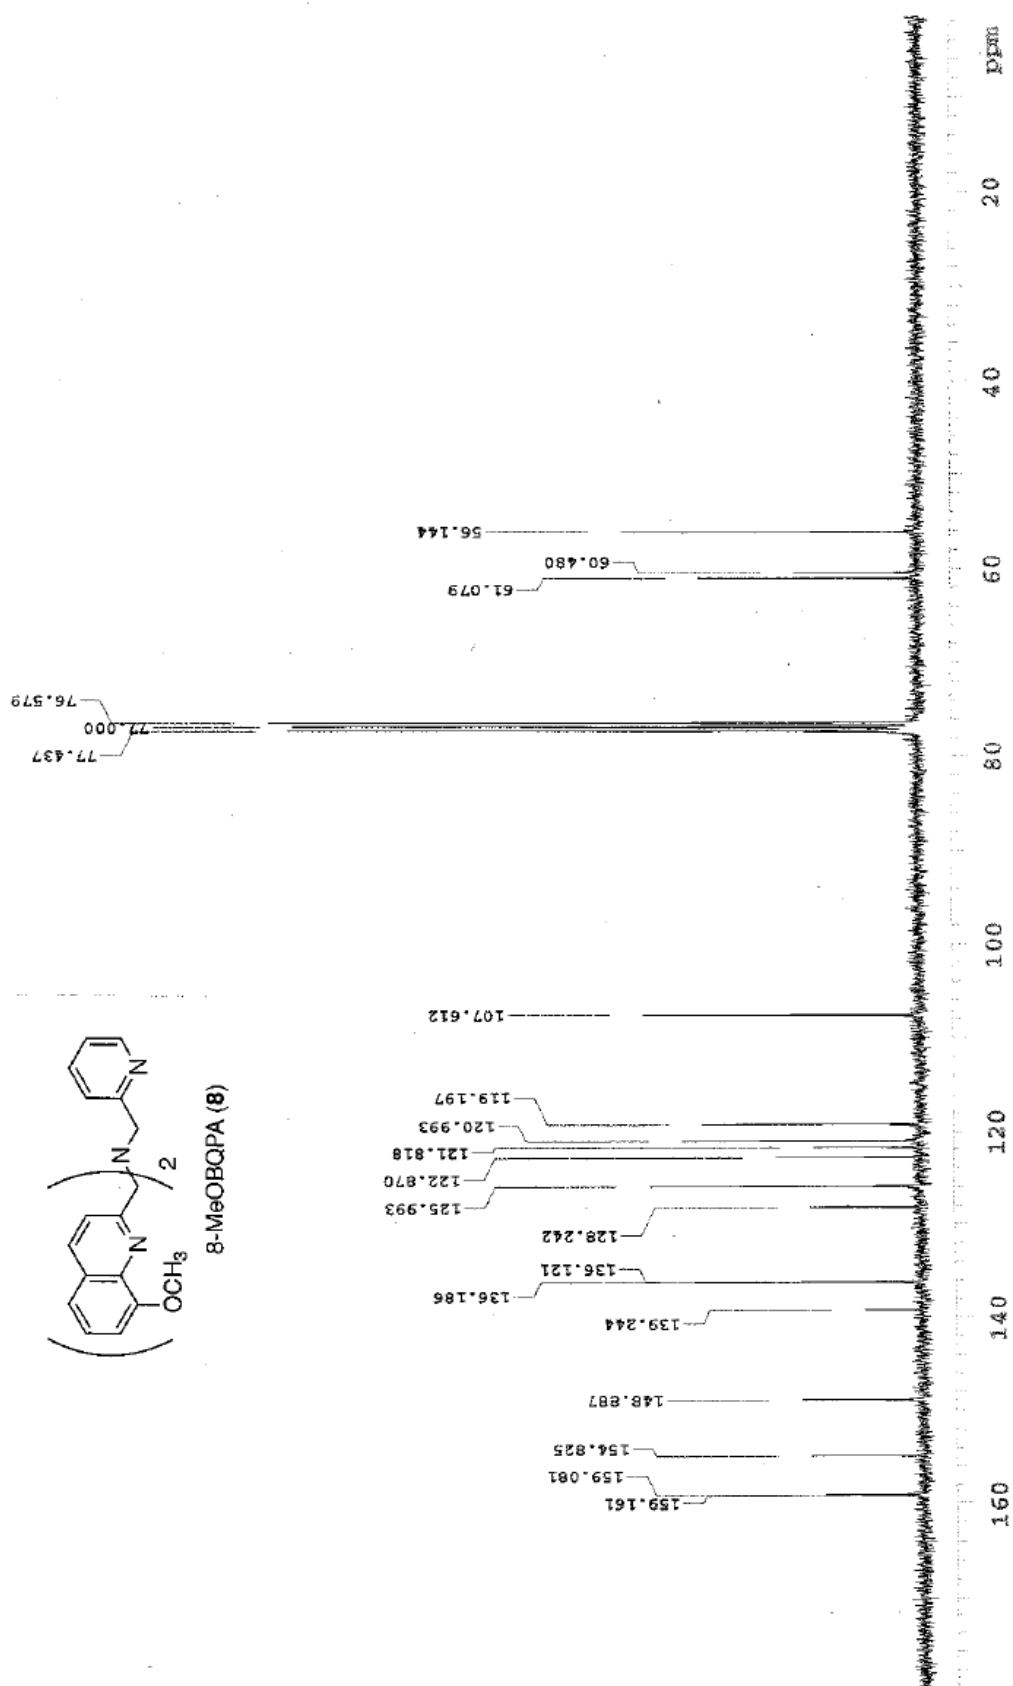

Fig. S36 <sup>13</sup>C NMR spectrum of 8-MeOBQPA (8) in CDCl<sub>3</sub>.

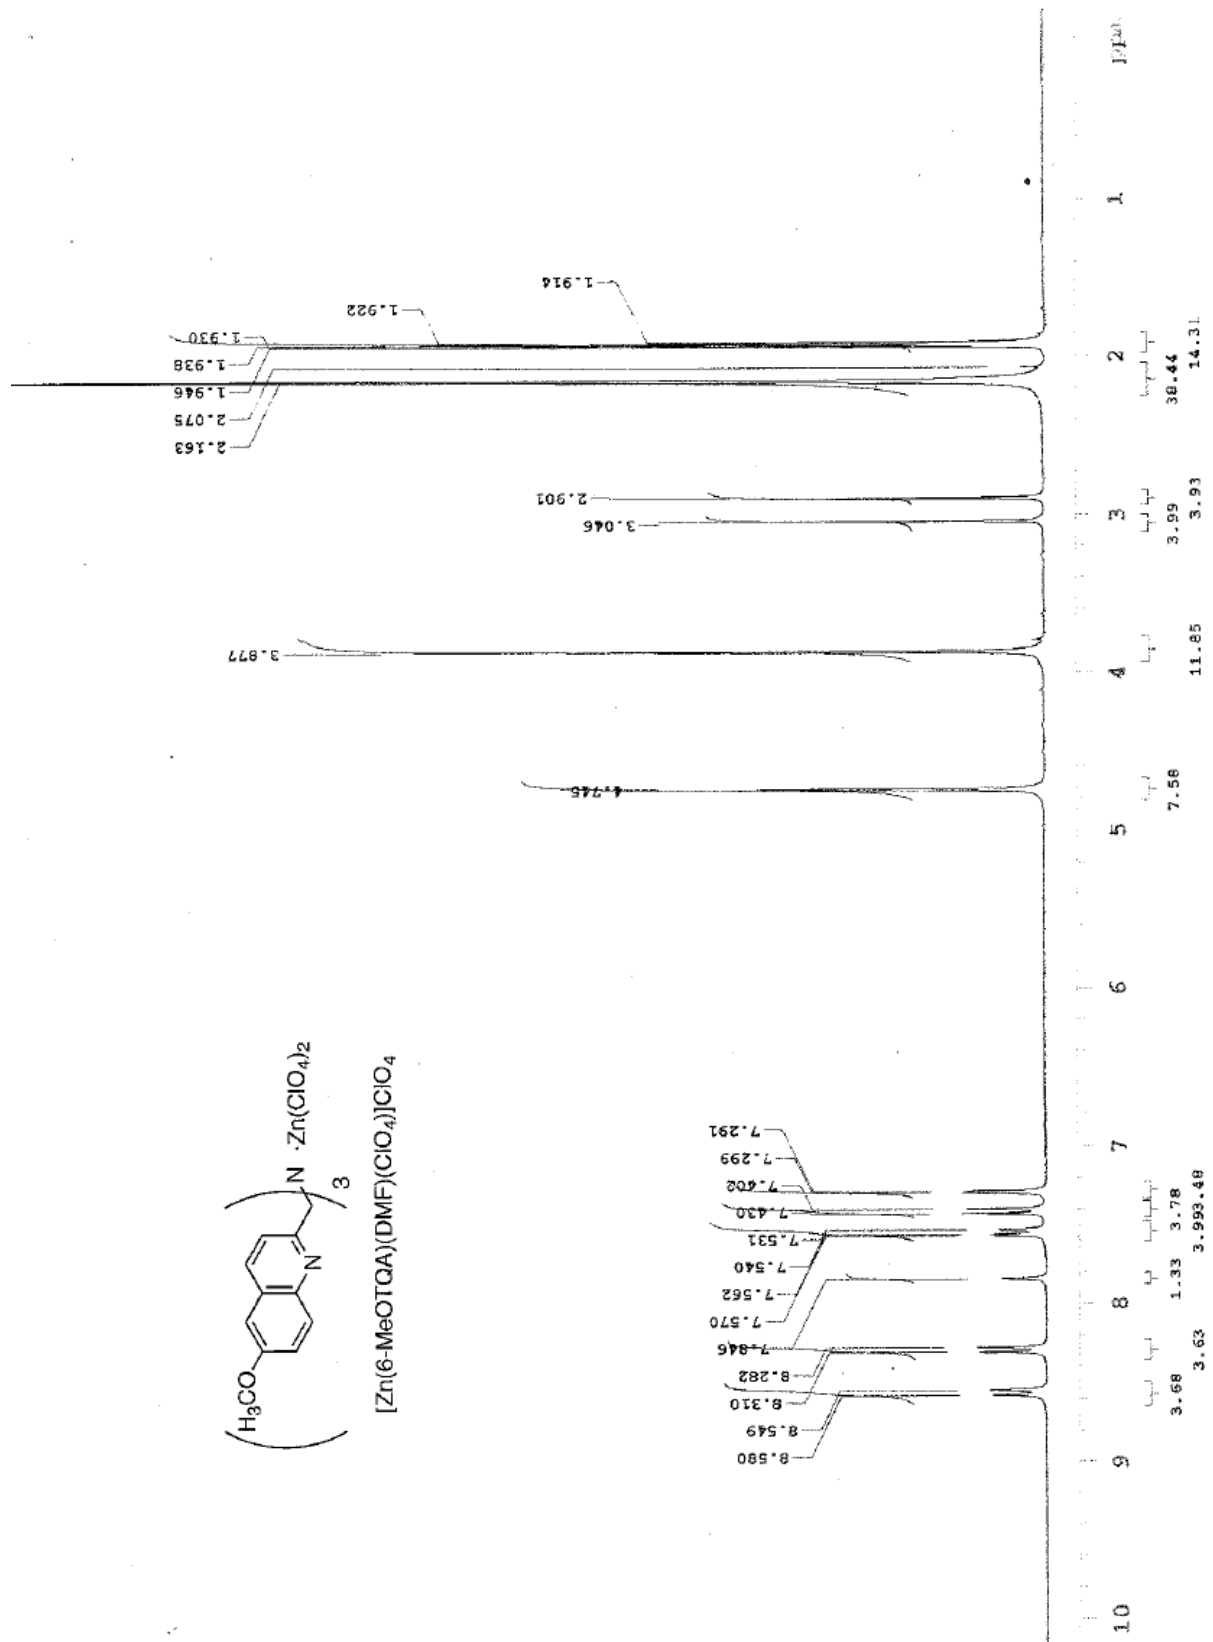

Fig. S37  $^{13}C$  NMR spectrum of  $[Zn(6\text{-MeOTQA})(DMF)(ClO_4)]ClO_4$  in  $CD_3CN$ .

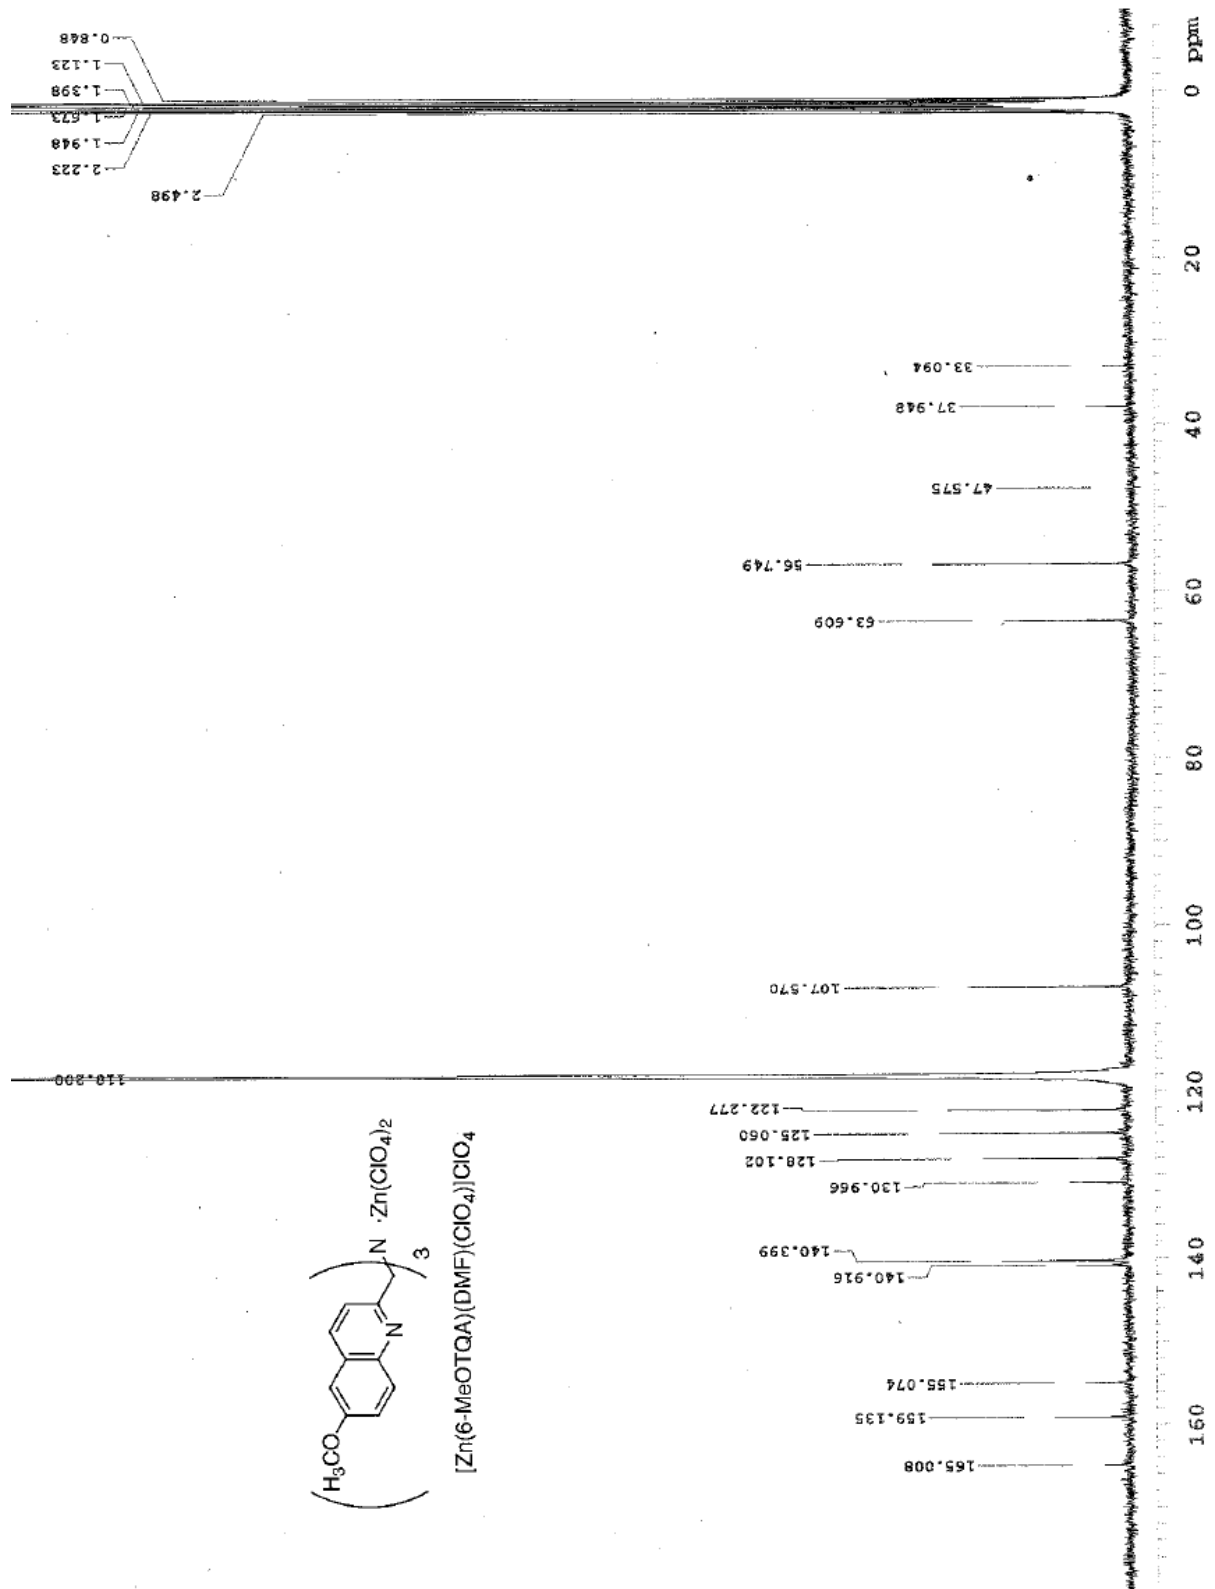

Fig. S38  $^{13}C$  NMR spectrum of  $[Zn(6\text{-MeOTQA})(DMF)(ClO_4)]ClO_4$  in  $CD_3CN$ .

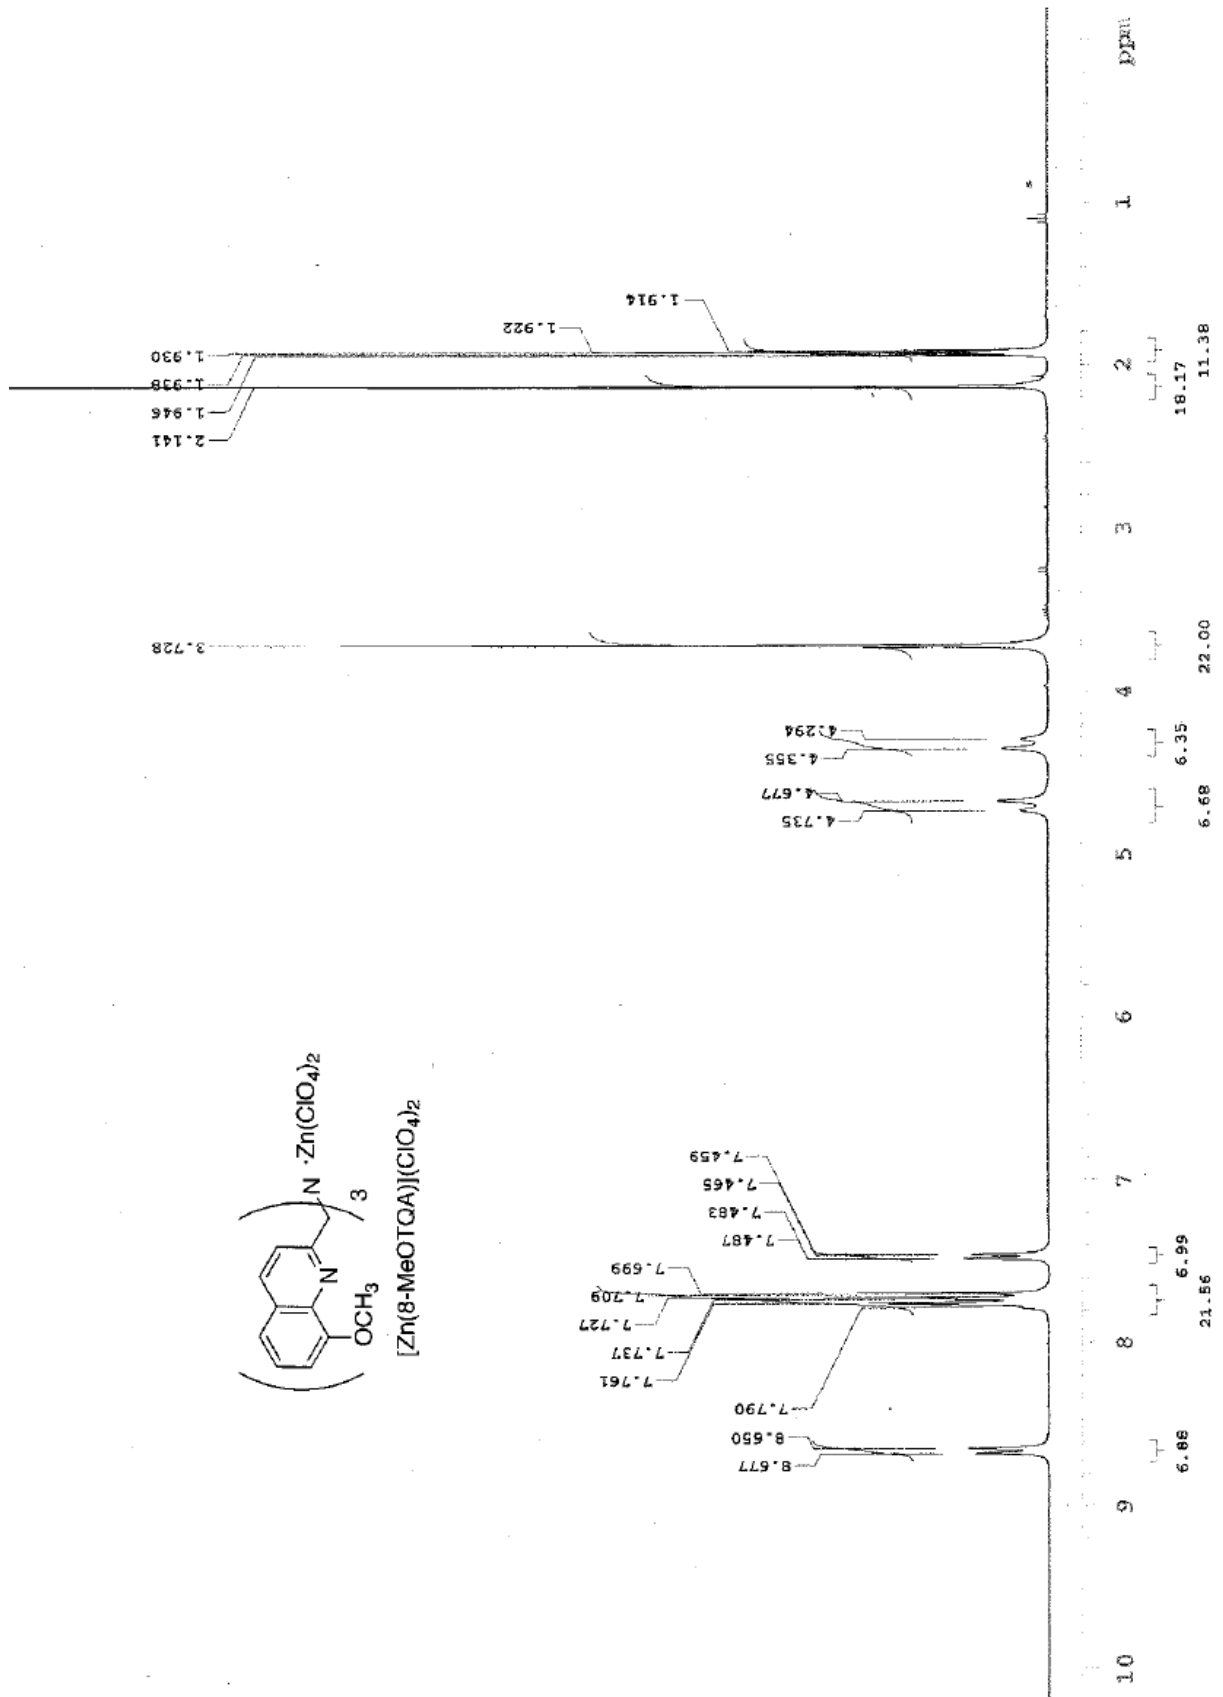

Fig. S39  $^1H$  NMR spectrum of  $[Zn(8-MeOTQA)](ClO_4)_2$  in  $CD_3CN$ .

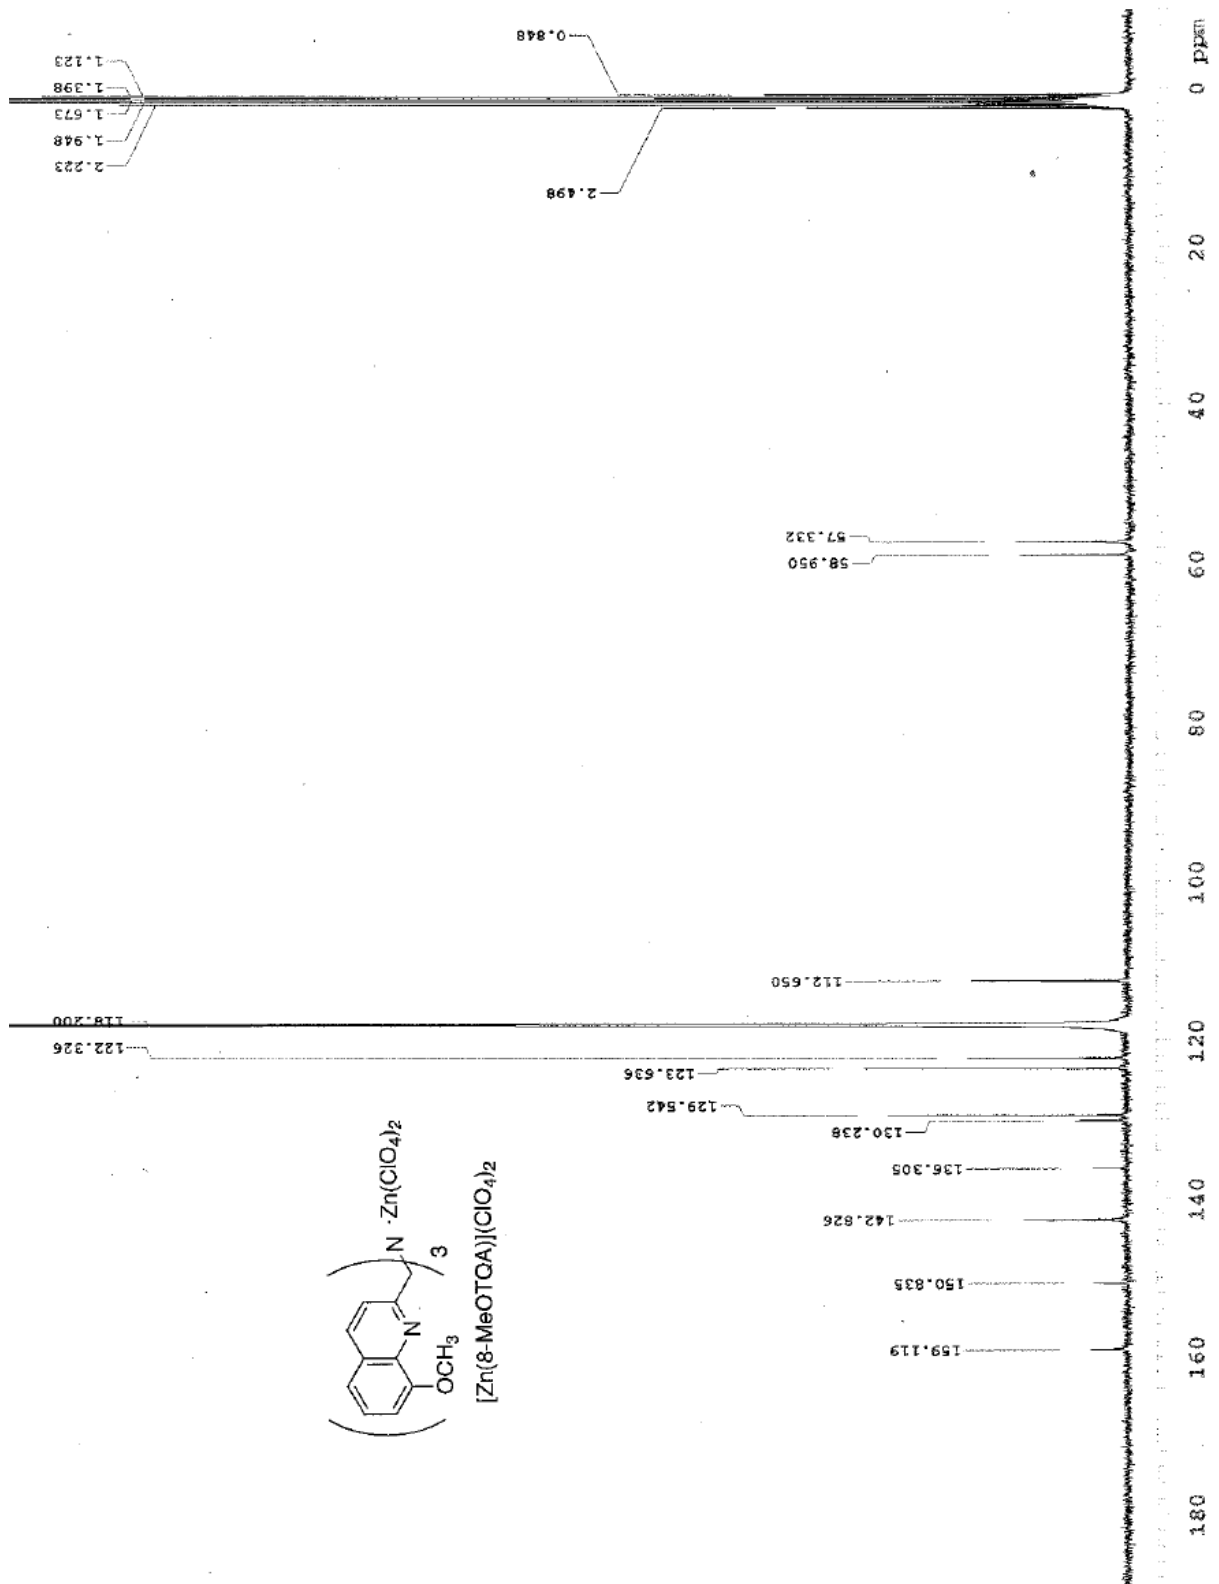

Fig. S40  $^{13}\text{C}$  NMR spectrum of  $[\text{Zn}(8\text{-MeOTQA})](\text{ClO}_4)_2$  in  $\text{CD}_3\text{CN}$ .

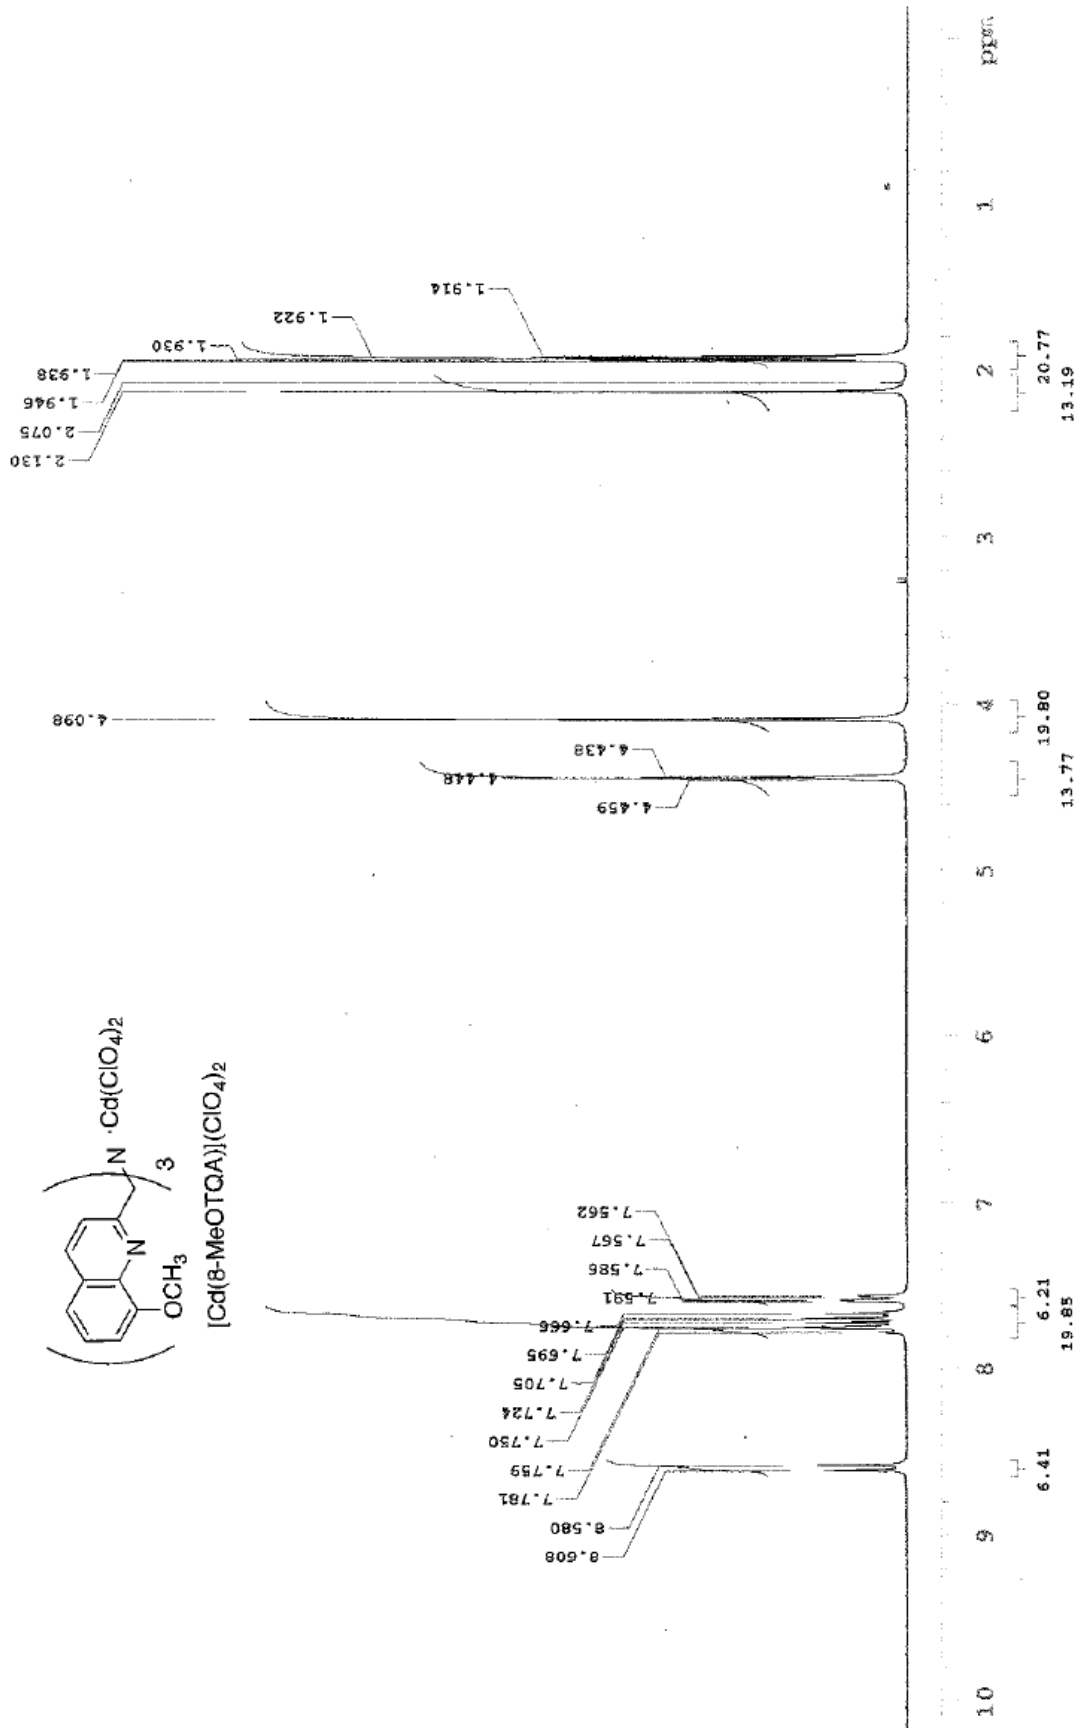

Fig. S41  $^1\text{H}$  NMR spectrum of  $[\text{Cd}(\text{8-MeOTQA})](\text{ClO}_4)_2$  in  $\text{CD}_3\text{CN}$ .



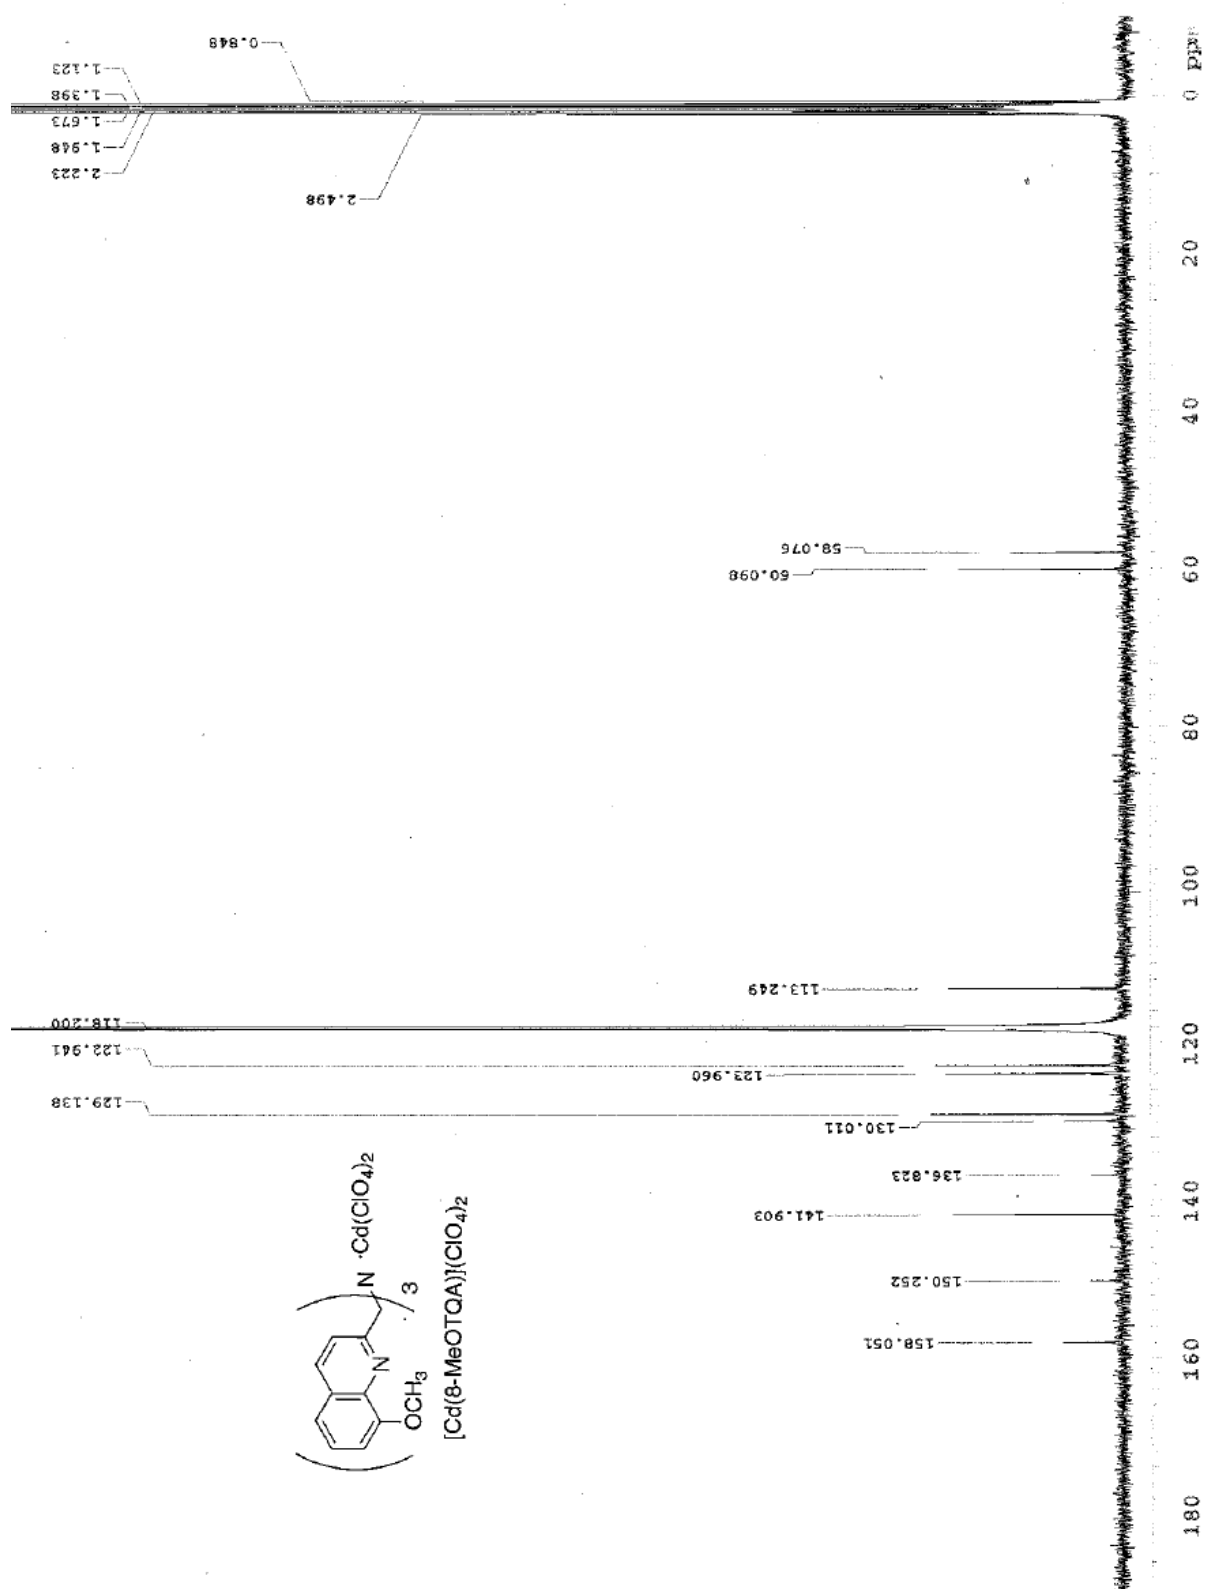

Fig. S42  $^{13}\text{C}$  NMR spectrum of  $[\text{Cd}(\text{8-MeOTQA})](\text{ClO}_4)_2$  in  $\text{CD}_3\text{CN}$ .

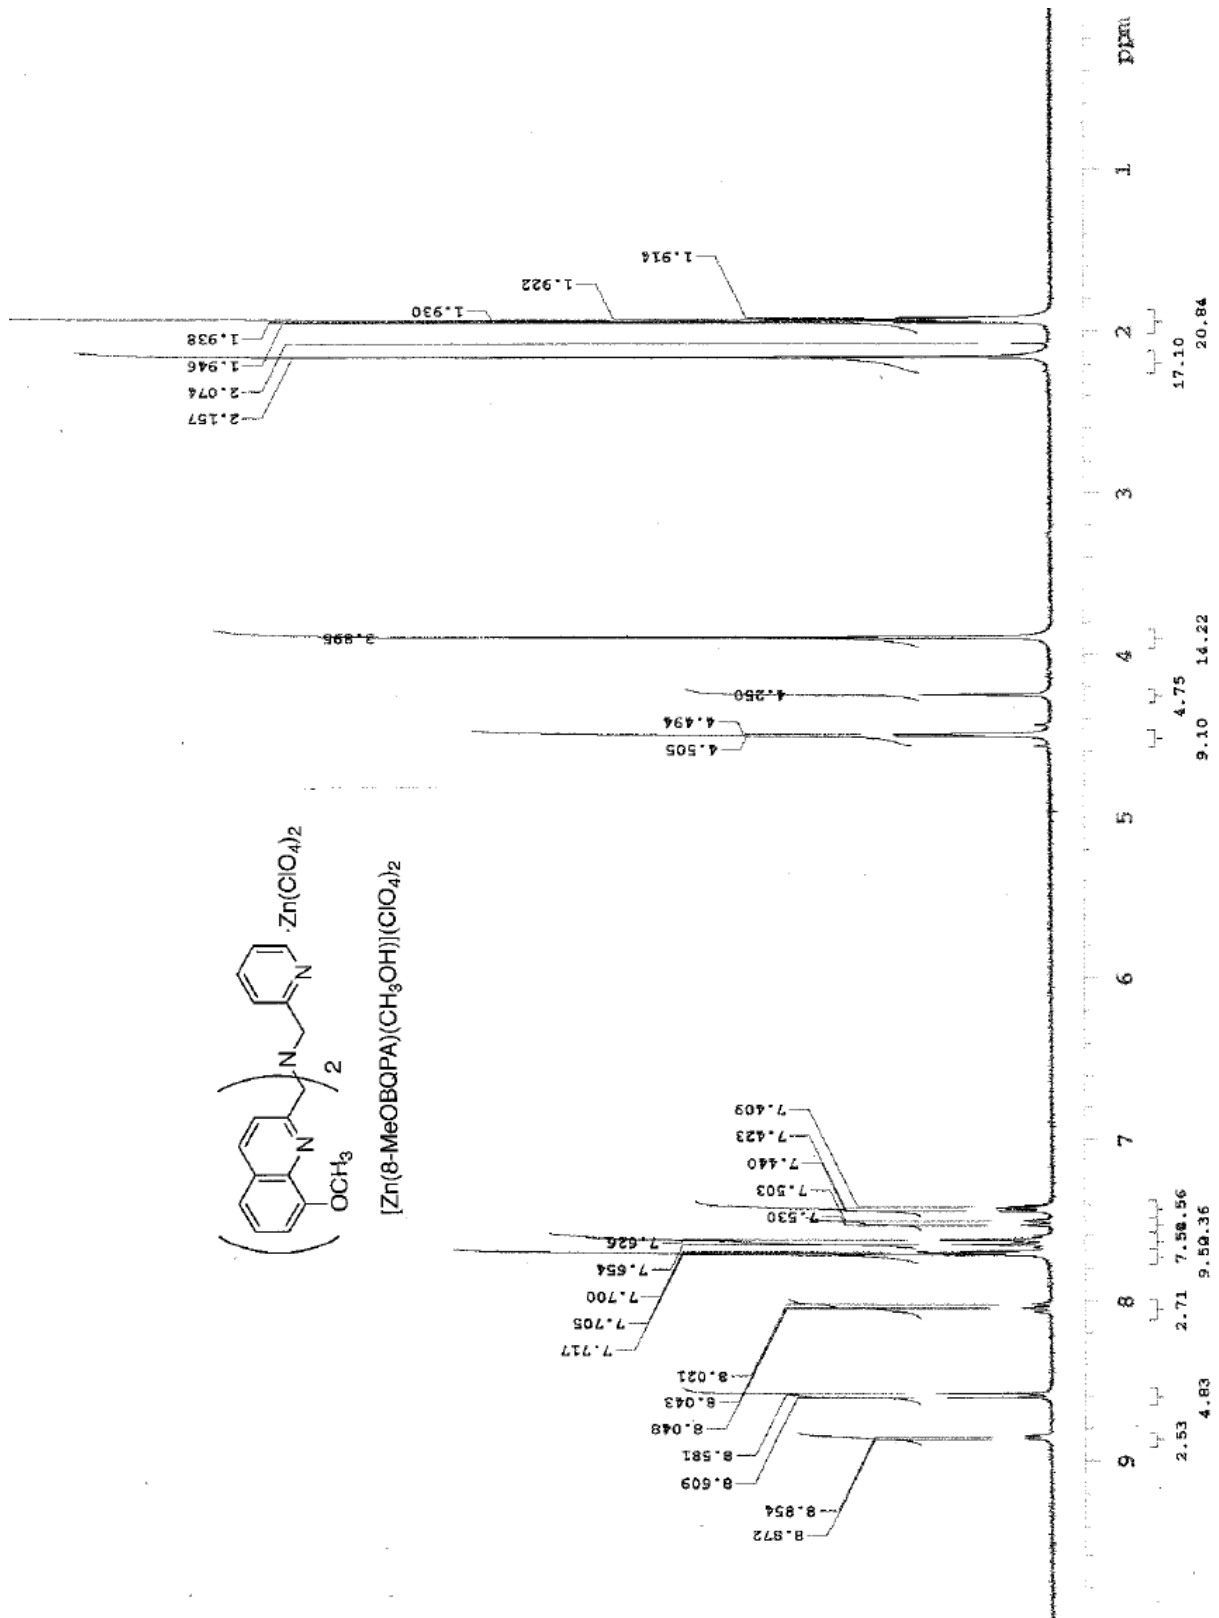

Fig. S43  $^1\text{H}$  NMR spectrum of  $[\text{Zn}(\text{8-MeOBQPA})(\text{CH}_3\text{OH})](\text{ClO}_4)_2$  in  $\text{CD}_3\text{CN}$ .

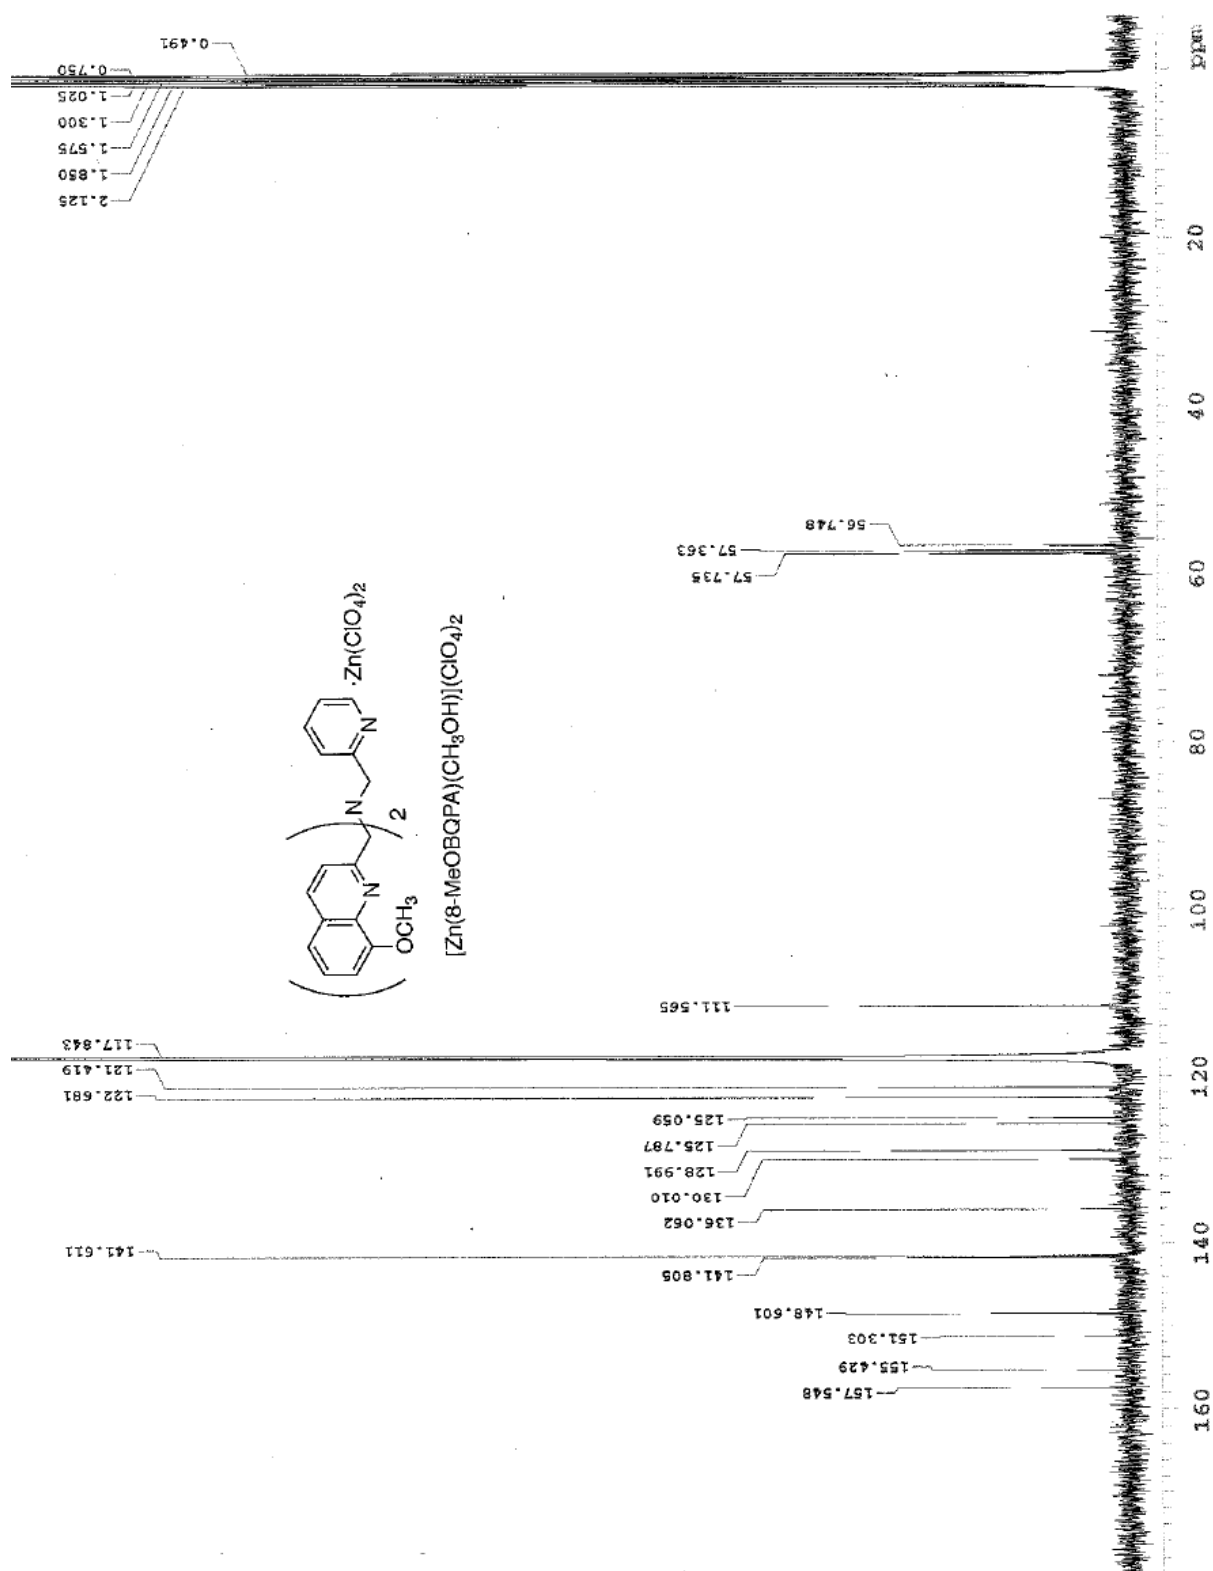

Fig. S44  $^{13}C$  NMR spectrum of  $[Zn(8-MeOBQPA)(CH_3OH)](ClO_4)_2$  in  $CD_3CN$ .

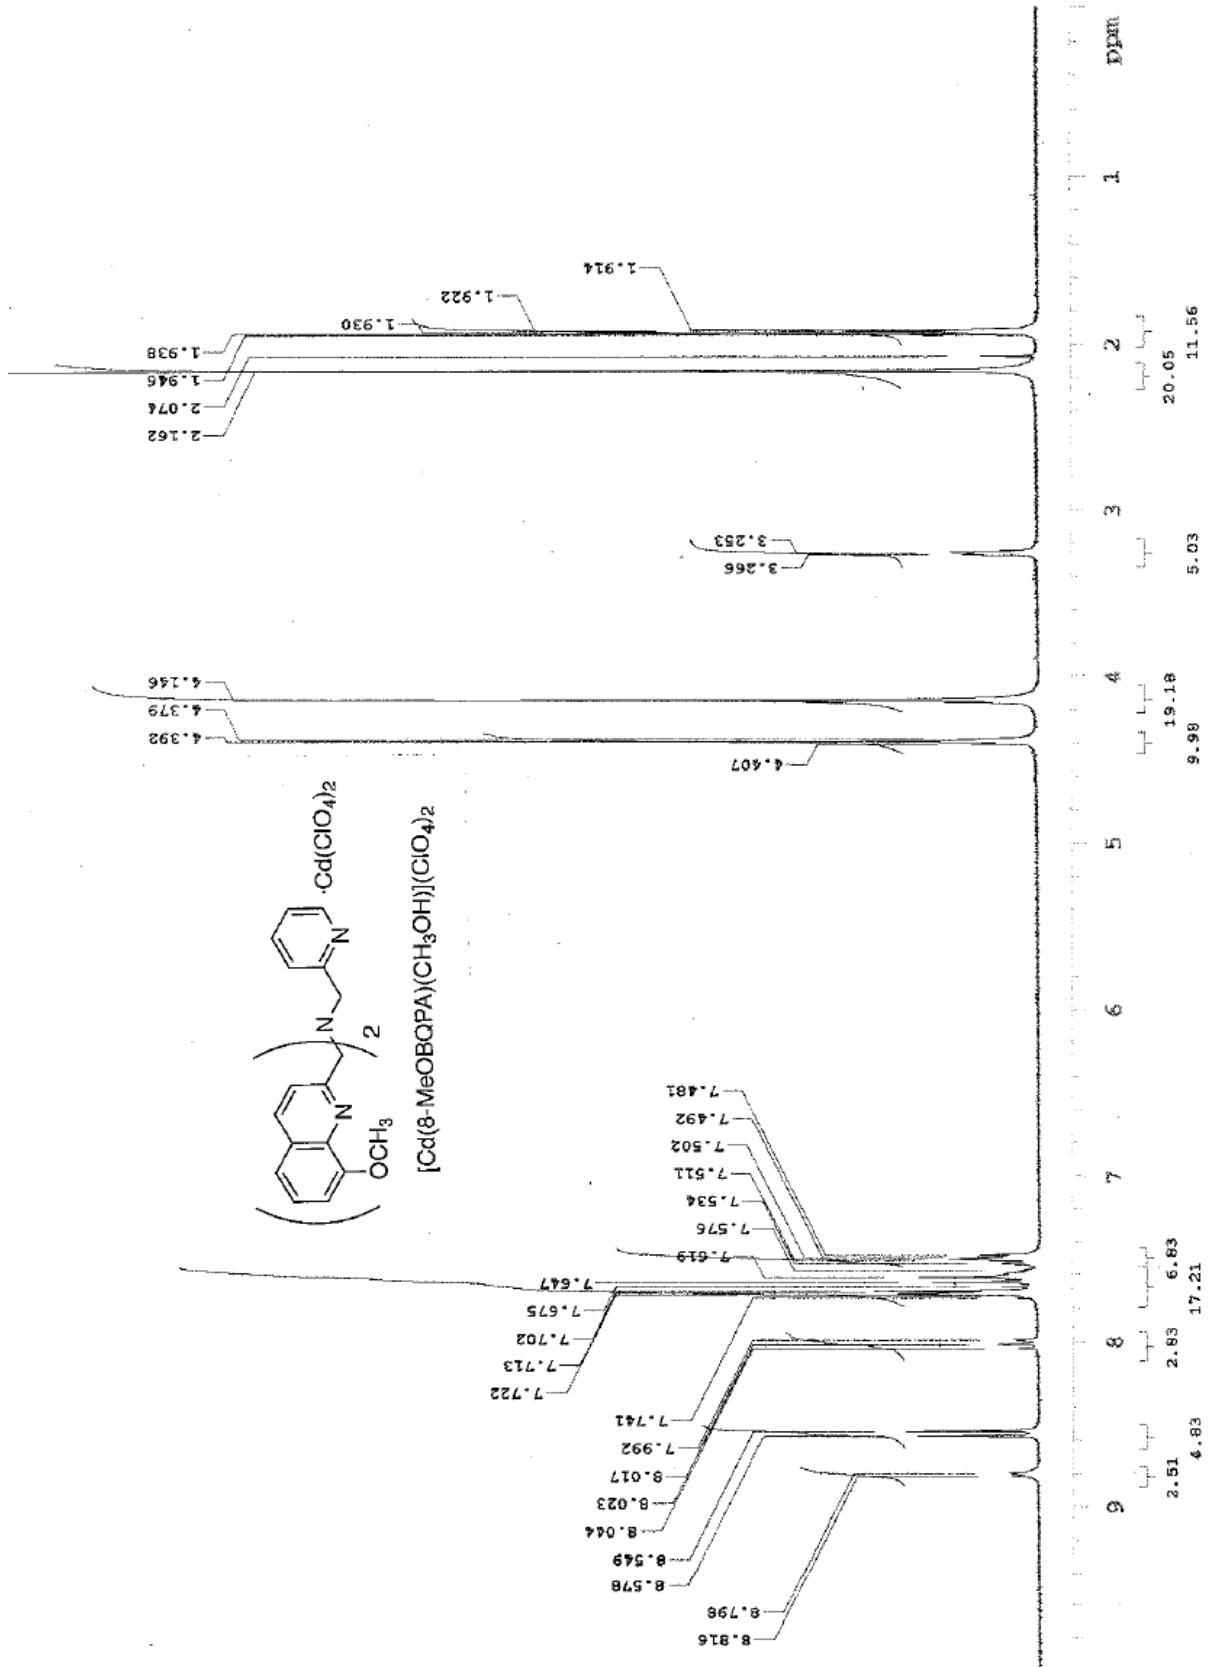

Fig. S45  $^1\text{H}$  NMR spectrum of  $[\text{Cd}(\text{8-MeOBQPA})(\text{CH}_3\text{OH})](\text{ClO}_4)_2$  in  $\text{CD}_3\text{CN}$ .

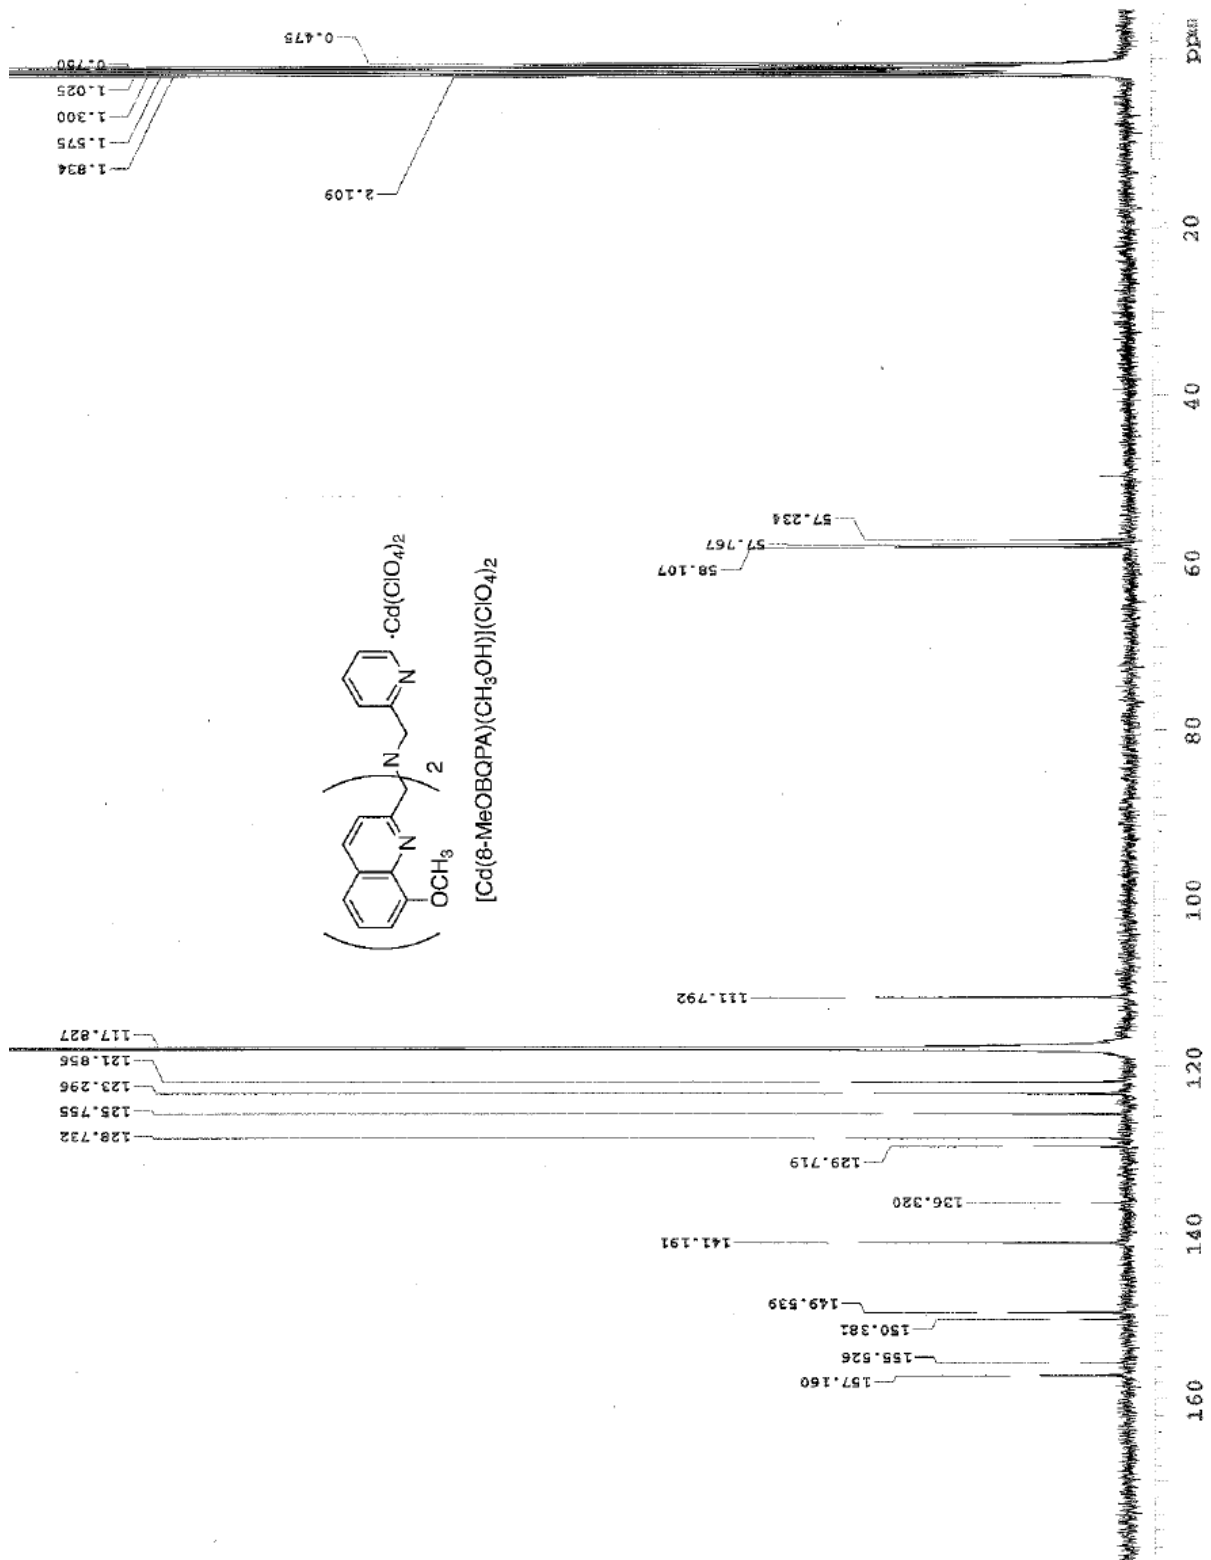

Fig. S46  $^{13}C$  NMR spectrum of  $[Cd(8-MeOBQPA)(CH_3OH)](ClO_4)_2$  in  $CD_3CN$ .
